# Supplementary material for: Comparative genomics analysis of the MYB gene family in barley: preliminary insights into evolution and biological function in Blue Qingke
Source: PeerJ. 2024 Dec 2;12:e18443. doi: 10.7717/peerj.18443 (PMC11619697; doi:10.7717/peerj.18443)
Supplement: Supplemental Information 3 [file peerj-12-18443-s003.xlsx]

## Sheet: Sheet1
Table S2 cDNA reverse transcription reaction system
PCR reaction system	Usage
5XRT Mix	4ul
RNA	1000/RNA concentration (V)
ddH2O	20-4-V
Total	20ul
PCR reaction: 37 ℃ 15 min, 85 ℃ 5 s, 4 ℃ ∞
