# Supplementary material for: Comparative genomics analysis of the MYB gene family in barley: preliminary insights into evolution and biological function in Blue Qingke
Source: PeerJ. 2024 Dec 2;12:e18443. doi: 10.7717/peerj.18443 (PMC11619697; doi:10.7717/peerj.18443)
Supplement: Supplemental Information 4 [file peerj-12-18443-s004.xlsx]

## Sheet: Sheet1
Table S3 qRT-PCR reaction system
PCR reaction system	Usage
cDNA	2ul
Primer-F	0.8ul
Primer-R	0.8ul
TB Green Premix Ex Taq II (Tli RNaseH Plus) (2X)	10μl
ddH2O	6.4μl
Total	20μl
