# Supplementary material for: Comparative genomics analysis of the MYB gene family in barley: preliminary insights into evolution and biological function in Blue Qingke
Source: PeerJ. 2024 Dec 2;12:e18443. doi: 10.7717/peerj.18443 (PMC11619697; doi:10.7717/peerj.18443)
Supplement: Supplemental Information 5 [file peerj-12-18443-s005.xlsx]

## Sheet: Sheet1
Table S4 Physicochemical properties and domain composition of 92 HvMYB proteins
Gene name	Gene ID	Subcellular localization	Number of Amino Acid	Molecular Weight/kDa	Theoretical pI	Instability Index	Aliphatic Index	Grand Average of Hydropathicity(GRAVY)	Domain composition
HvMYB1	HORVU.MOREX.r3.1HG0017050.1	Nucleus	325	35.46	5.81	57.16	70.68	-0.4	Only PLN03212 superfamily domain
HvMYB2	HORVU.MOREX.r3.1HG0018590.1	Nucleus	429	47.34	6.19	59.44	63.24	-0.656	Only PLN03091 superfamily domain
HvMYB3	HORVU.MOREX.r3.1HG0025510.1	Mitochondrion	221	24.61	9.12	58.05	85.75	-0.295	Only Myb_DNA-binding domain
HvMYB4	HORVU.MOREX.r3.1HG0031520.1	Nucleus	837	92.52	6.28	58.28	68.18	-0.697	Myb_DNA-binding domain and PLN03091 superfamily domain
HvMYB5	HORVU.MOREX.r3.1HG0043220.1	Nucleus	263	28.69	6.5	55.99	67.6	-0.668	Only PLN03091 superfamily domain
HvMYB6	HORVU.MOREX.r3.1HG0054480.1	Nucleus	247	26.86	5.45	67.62	66.8	-0.421	PLN03091 superfamily domain and PRK12323 superfamily domain
HvMYB7	HORVU.MOREX.r3.1HG0057900.1	Nucleus	270	29.59	8.82	48.2	68.74	-0.73	Only myb_SHAQKYF domain
HvMYB8	HORVU.MOREX.r3.1HG0066390.1	Nucleus	305	31.36	6.59	46.93	58.43	-0.431	Only myb_SHAQKYF domain
HvMYB9	HORVU.MOREX.r3.1HG0069820.1	Nucleus	457	50.39	5.12	47.23	60.94	-0.605	Only PLN03091 superfamily domain
HvMYB10	HORVU.MOREX.r3.1HG0073480.1	Nucleus	599	65.94	8.52	48.43	71.45	-0.619	Myb_DNA-bind_6 domain and PLN03212 superfamily domain
HvMYB11	HORVU.MOREX.r3.1HG0075320.1	Nucleus	251	27.6	8.69	52.18	66.97	-0.632	Only PLN03091 superfamily domain
HvMYB12	HORVU.MOREX.r3.1HG0079700.1	Nucleus	217	24.23	10.3	73.46	64.47	-0.796	Only PLN03091 superfamily domain
HvMYB13	HORVU.MOREX.r3.1HG0079760.1	Nucleus	302	33.1	5.1	54.76	72.45	-0.49	Only PLN03091 superfamily domain
HvMYB14	HORVU.MOREX.r3.1HG0084760.1	Nucleus	305	32.12	8.07	51.88	65.74	-0.279	Only PLN03091 superfamily domain
HvMYB15	HORVU.MOREX.r3.1HG0089600.1	Cytosol	88	9.86	6.57	78.58	47.73	-0.784	Only SANT domain
HvMYB16	HORVU.MOREX.r3.1HG0089650.1	Cytosol	88	9.86	6.73	67.59	52.05	-0.707	Only SANT domain
HvMYB17	HORVU.MOREX.r3.1HG0089660.1	Nucleus	87	9.89	6.57	77	47.13	-0.811	Only SANT domain
HvMYB18	HORVU.MOREX.r3.1HG0091990.1	Cytosol	96	10.76	9.2	49.47	74.27	-0.603	Only SANT domain
HvMYB19	HORVU.MOREX.r3.2HG0104540.1	Nucleus	351	38.25	8.34	52.1	59.6	-0.713	Only PLN03091 superfamily domain
HvMYB20	HORVU.MOREX.r3.2HG0121480.1	Nucleus	373	39.44	6.04	47.14	69.76	-0.413	Only PLN03091 superfamily domain
HvMYB21	HORVU.MOREX.r3.2HG0135680.1	Nucleus	353	38.9	6.25	47.4	76.43	-0.425	Only PLN03212 superfamily domain
HvMYB22	HORVU.MOREX.r3.2HG0144990.1	Nucleus	382	41.26	6.51	47.09	63.12	-0.467	Only PLN03091 superfamily domain
HvMYB23	HORVU.MOREX.r3.2HG0184160.1	Nucleus	287	30.76	7.01	41.4	69.58	-0.424	Only PLN03091 superfamily domain
HvMYB24	HORVU.MOREX.r3.2HG0197540.1	Nucleus	358	38.63	4.86	50.05	71.23	-0.495	Only PLN03091 superfamily domain
HvMYB25	HORVU.MOREX.r3.2HG0210870.1	Nucleus	352	37.94	6.28	61.51	65.85	-0.553	Only PLN03091 superfamily domain
HvMYB26	HORVU.MOREX.r3.3HG0222330.1	Nucleus	351	37.86	5.92	59.35	69.97	-0.402	Only PLN03091 superfamily domain
HvMYB27	HORVU.MOREX.r3.3HG0222600.1	Nucleus	184	20.07	9.75	69.69	60.05	-0.885	Only PLN03091 superfamily domain
HvMYB28	HORVU.MOREX.r3.3HG0228120.1	Nucleus	226	24.98	11.02	76.05	66.59	-0.681	SANT superfamily domain and F-box_SF superfamily domain
HvMYB29	HORVU.MOREX.r3.3HG0228140.1	Nucleus	303	32.97	9.41	57.96	51.25	-0.722	SANT domain and SANT superfamily domain
HvMYB30	HORVU.MOREX.r3.3HG0234110.1	Nucleus	286	30.61	5.39	55.3	64.9	-0.57	Only PLN03091 superfamily domain
HvMYB31	HORVU.MOREX.r3.3HG0236520.1	Chloroplast	305	32.14	10.25	58.1	65.38	-0.433	Only myb_SHAQKYF domain
HvMYB32	HORVU.MOREX.r3.3HG0236690.1	Nucleus	269	28.57	5.96	51.17	67.36	-0.29	Only PLN03091 superfamily domain
HvMYB33	HORVU.MOREX.r3.3HG0236900.1	Chloroplast	363	38.67	8.45	60.06	61.57	-0.485	Only myb_SHAQKYF domain
HvMYB34	HORVU.MOREX.r3.3HG0248740.1	Nucleus	981	107.71	5.29	56.27	62.17	-0.693	Myb_DNA-binding domain and PLN03212 superfamily domain
HvMYB35	HORVU.MOREX.r3.3HG0264850.1	Nucleus	303	33.67	5.78	55.46	62.51	-0.601	Only PLN03091 superfamily domain
HvMYB36	HORVU.MOREX.r3.3HG0274520.1	Nucleus	212	23.89	6.66	44.51	65.85	-0.65	Only PLN03091 superfamily domain
HvMYB37	HORVU.MOREX.r3.3HG0280840.1	Nucleus	296	31.77	8.38	57.9	61.86	-0.397	Only PLN03091 superfamily domain
HvMYB38	HORVU.MOREX.r3.3HG0283250.1	Nucleus	280	30.81	5.68	52.3	66.93	-0.635	Only PLN03091 superfamily domain
HvMYB39	HORVU.MOREX.r3.3HG0284070.1	Nucleus	293	31.28	7.12	47.52	80.03	-0.22	Only PLN03091 superfamily domain
HvMYB40	HORVU.MOREX.r3.3HG0298680.1	Nucleus	270	29.32	9.16	58.8	68.81	-0.509	Only PLN03091 superfamily domain
HvMYB41	HORVU.MOREX.r3.3HG0300210.1	Nucleus	176	20.21	7.82	60.41	55.63	-0.964	SANT domain and SANT superfamily domain
HvMYB42	HORVU.MOREX.r3.3HG0301170.1	Nucleus	415	44.99	5.85	54.89	63.13	-0.483	Only PLN03212 superfamily domain
HvMYB43	HORVU.MOREX.r3.3HG0301430.1	Nucleus	295	32.35	6.25	61.17	63.49	-0.578	SANT domain and myb_SHAQKYF domain
HvMYB44	HORVU.MOREX.r3.3HG0302660.1	Nucleus	604	65.99	7.32	47.91	71.21	-0.612	Myb_DNA-bind_6 domain and PLN03212 superfamily domain
HvMYB45	HORVU.MOREX.r3.3HG0311940.1	Nucleus	355	37.71	8.88	46.44	67.49	-0.315	Only PLN03091 superfamily domain
HvMYB46	HORVU.MOREX.r3.4HG0338090.1	Nucleus	243	27.6	7.73	58.91	58.72	-0.88	Only PLN03091 superfamily domain
HvMYB47	HORVU.MOREX.r3.4HG0346020.1	Nucleus	278	29.97	9.64	55.79	58.02	-0.615	Only PLN03091 superfamily domain
HvMYB48	HORVU.MOREX.r3.4HG0353430.1	Nucleus	302	33.12	6.26	56.26	66.29	-0.511	Only PLN03212 superfamily domain
HvMYB49	HORVU.MOREX.r3.4HG0359060.1	Nucleus	293	32.67	5.38	55.03	68.98	-0.614	Only PLN03091 superfamily domain
HvMYB50	HORVU.MOREX.r3.4HG0380990.1	Nucleus	313	34.61	5.02	62.45	72.17	-0.472	Only PLN03091 superfamily domain
HvMYB51	HORVU.MOREX.r3.4HG0383040.1	Nucleus	340	37.29	4.98	53.83	72.85	-0.643	PLN03212 superfamily domain and P_C superfamily domain
HvMYB52	HORVU.MOREX.r3.4HG0384200.1	Nucleus	307	32.88	5.62	37.22	75.5	-0.45	Only PLN03091 superfamily domain
HvMYB53	HORVU.MOREX.r3.4HG0392620.1	Nucleus	243	26.9	9.18	57.11	70.7	-0.578	Only PLN03212 superfamily domain
HvMYB54	HORVU.MOREX.r3.4HG0412080.1	Nucleus	252	28.9	6.79	70.92	68.97	-0.79	Only PLN03212 superfamily domain
HvMYB55	HORVU.MOREX.r3.5HG0441760.1	Mitochondrion	362	41.53	9.45	64.12	62.98	-0.889	Only PLN03091 superfamily domain
HvMYB56	HORVU.MOREX.r3.5HG0442330.2	Nucleus	237	27.11	9.37	63.85	59.2	-0.845	Only PLN03091 superfamily domain
HvMYB57	HORVU.MOREX.r3.5HG0443240.1	Nucleus	282	32.15	5.87	61.08	61.95	-0.761	Only PLN03091 superfamily domain
HvMYB58	HORVU.MOREX.r3.5HG0455320.1	Nucleus	264	28.18	8.9	53.87	74.73	-0.491	Only PLN03091 superfamily domain
HvMYB59	HORVU.MOREX.r3.5HG0467660.1	Nucleus	424	44.7	9.6	88.96	58.75	-0.489	Only PLN03091 superfamily domain
HvMYB60	HORVU.MOREX.r3.5HG0479070.1	Nucleus	281	30.86	5.23	60.17	69.86	-0.478	Only PLN03091 superfamily domain
HvMYB61	HORVU.MOREX.r3.5HG0481700.1	Nucleus	301	32.4	7	57.28	72.62	-0.447	Only PLN03091 superfamily domain
HvMYB62	HORVU.MOREX.r3.5HG0492890.1	Cytosol	87	9.73	9	65.31	53.91	-0.932	Only SANT domain
HvMYB63	HORVU.MOREX.r3.5HG0492940.1	Cytosol	87	9.73	9	65.31	53.91	-0.932	Only SANT domain
HvMYB64	HORVU.MOREX.r3.5HG0494820.1	Nucleus	960	106.35	9.13	46.81	69.73	-0.736	Myb_DNA-bind_6 domain and REB1 superfamily domain
HvMYB65	HORVU.MOREX.r3.5HG0498910.1	Nucleus	287	31.96	5.24	41.29	78.47	-0.616	Only PLN03091 superfamily domain
HvMYB66	HORVU.MOREX.r3.5HG0500520.1	Nucleus	269	29.9	9.13	43.66	75.5	-0.513	Only PLN03091 superfamily domain
HvMYB67	HORVU.MOREX.r3.5HG0513490.1	Nucleus	311	34.11	7.58	57.15	70.61	-0.483	Only PLN03091 superfamily domain
HvMYB68	HORVU.MOREX.r3.5HG0521570.1	Nucleus	1058	118.44	5.06	57.51	68.01	-0.972	REB1 superfamily, Myb_Cef, and tolA superfamily domain
HvMYB69	HORVU.MOREX.r3.5HG0536160.1	Nucleus	282	31.12	7.64	42.59	61.03	-0.495	Only PLN03212 superfamily domain
HvMYB70	HORVU.MOREX.r3.6HG0544390.1	Nucleus	313	33.8	7.03	53.73	58.4	-0.585	Only PLN03091 superfamily domain
HvMYB71	HORVU.MOREX.r3.6HG0566060.1	Nucleus	400	43.4	6.13	60.45	75.25	-0.492	Only PLN03091 superfamily domain
HvMYB72	HORVU.MOREX.r3.6HG0575580.1	Nucleus	296	31.78	8.75	74.66	61.42	-0.626	Only PLN03091 superfamily domain
HvMYB73	HORVU.MOREX.r3.6HG0595270.1	Nucleus	270	30.18	6.15	50.41	62.96	-0.824	Only PLN03091 superfamily domain
HvMYB74	HORVU.MOREX.r3.6HG0596330.1	Nucleus	243	26.61	6.39	65.01	63.95	-0.562	Only PLN03212 superfamily domain
HvMYB75	HORVU.MOREX.r3.6HG0596410.1	Nucleus	244	26.8	5.53	60.8	65.7	-0.563	Only PLN03212 superfamily domain
HvMYB76	HORVU.MOREX.r3.6HG0604730.1	Nucleus	449	48.57	8.74	53.94	45.7	-0.886	Only Myb_DNA-binding domain
HvMYB77	HORVU.MOREX.r3.6HG0617370.1	Nucleus	329	36.49	5.65	52.6	72.16	-0.603	Only PLN03091 superfamily domain
HvMYB78	HORVU.MOREX.r3.6HG0617380.1	Nucleus	329	36.5	5.15	53.38	77.48	-0.539	Only PLN03091 superfamily domain
HvMYB79	HORVU.MOREX.r3.6HG0622080.1	Nucleus	363	38.51	7.03	55.28	67.3	-0.408	Only PLN03091 superfamily domain
HvMYB80	HORVU.MOREX.r3.7HG0656270.1	Nucleus	427	46.25	5.37	57.3	68.22	-0.623	PLN03091 superfamily domain and PHA03247 superfamily domain
HvMYB81	HORVU.MOREX.r3.7HG0665260.1	Nucleus	324	36.04	6.12	59.79	76.3	-0.547	Only PLN03091 superfamily domain
HvMYB82	HORVU.MOREX.r3.7HG0666620.1	Chloroplast	205	23.31	9.04	35.16	65.56	-0.745	Only SANT domain
HvMYB83	HORVU.MOREX.r3.7HG0687560.1	Nucleus	238	26.59	9.16	58.47	76.26	-0.508	Only PLN03091 superfamily domain
HvMYB84	HORVU.MOREX.r3.7HG0699010.1	Nucleus	717	77.74	6.37	46.1	57.45	-0.704	Only SANT superfamily domain
HvMYB85	HORVU.MOREX.r3.7HG0701080.1	Nucleus	341	37.76	6.08	59.78	62.76	-0.55	Only PLN03091 superfamily domain
HvMYB86	HORVU.MOREX.r3.7HG0701130.2	Nucleus	364	38.74	9.37	68.75	61.18	-0.512	Only myb_SHAQKYF domain
HvMYB87	HORVU.MOREX.r3.7HG0701420.1	Nucleus	390	41.52	9.28	71.33	59.72	-0.554	Only myb_SHAQKYF domain
HvMYB88	HORVU.MOREX.r3.7HG0711530.1	Nucleus	350	38.82	7.59	60.6	72.23	-0.385	Only PLN03091 superfamily domain
HvMYB89	HORVU.MOREX.r3.7HG0726570.1	Nucleus	260	28.6	6.86	53.06	63.54	-0.511	Only PLN03091 superfamily domain
HvMYB90	HORVU.MOREX.r3.7HG0734500.1	Nucleus	390	42.78	7.8	52.21	65.59	-0.639	Only PLN03091 superfamily domain
HvMYB91	HORVU.MOREX.r3.7HG0746520.1	Nucleus	289	30.99	6.35	62.52	58.55	-0.618	Only PLN03091 superfamily domain
HvMYB92	HORVU.MOREX.r3.7HG0751030.1	Nucleus	491	53.17	5.8	55.22	58.02	-0.789	Only Myb_DNA-binding domain
