# Supplementary material for: Comparative genomics analysis of the MYB gene family in barley: preliminary insights into evolution and biological function in Blue Qingke
Source: PeerJ. 2024 Dec 2;12:e18443. doi: 10.7717/peerj.18443 (PMC11619697; doi:10.7717/peerj.18443)
Supplement: Supplemental Information 7 [file peerj-12-18443-s007.xlsx]

## Sheet: Arabidopsis
Table S6 Analysis of covariance between barley and the MYB family of Arabidopsis
chromosome	HORVU.MOREX Gene ID	match	chromosome	Arabidopsis Gene ID
1H	HORVU.MOREX.r3.1HG0017050.1	=	1H	AT1G48000.1
1H	HORVU.MOREX.r3.1HG0073480.1	=	3H	AT3G09370.3
1H	HORVU.MOREX.r3.1HG0043220.1	=	3H	AT3G23250.1
1H	HORVU.MOREX.r3.1HG0073480.1	=	5H	AT5G02320.2
2H	HORVU.MOREX.r3.2HG0184160.1	=	3H	AT3G61250.1
2H	HORVU.MOREX.r3.2HG0135680.1	=	4H	AT4G05100.1
2H	HORVU.MOREX.r3.2HG0135680.1	=	4H	AT4G21440.1
3H	HORVU.MOREX.r3.3HG0301430.1	=	2H	AT2G38090.1
3H	HORVU.MOREX.r3.3HG0302660.1	=	3H	AT3G09370.3
3H	HORVU.MOREX.r3.3HG0302660.1	=	5H	AT5G02320.2
3H	HORVU.MOREX.r3.3HG0301170.1	=	5H	AT5G58850.1
3H	HORVU.MOREX.r3.3HG0301430.1	=	5H	AT5G58900.1
3H	HORVU.MOREX.r3.3HG0301430.1	=	5H	AT5G05790.1
3H	HORVU.MOREX.r3.3HG0301430.1	=	5H	AT5G01200.1
4H	HORVU.MOREX.r3.4HG0383040.1	=	2H	AT2G47460.1
4H	HORVU.MOREX.r3.4HG0383040.1	=	3H	AT3G62610.1
4H	HORVU.MOREX.r3.4HG0380990.1	=	3H	AT3G06490.1
5H	HORVU.MOREX.r3.5HG0500520.1	=	4H	AT4G34990.1
6H	HORVU.MOREX.r3.6HG0622080.1	=	5H	AT5G57620.1
7H	HORVU.MOREX.r3.7HG0687560.1	=	4H	AT4G34990.1
7H	HORVU.MOREX.r3.7HG0665260.1	=	5H	AT5G65230.1

## Sheet: Rice
Table S6 Analysis of covariance between barley and the MYB family of rice
chromosome	HORVU.MOREX Gene ID	match	chromosome	Rice Gene ID
1H	HORVU.MOREX.r3.1HG0073480.1	=	1H	Os01t0841500-01
1H	HORVU.MOREX.r3.1HG0079700.1	=	1H	Os01t0702700-01
1H	HORVU.MOREX.r3.1HG0089600.1	=	1H	Os01t0635000-00
1H	HORVU.MOREX.r3.1HG0089600.1	=	1H	Os01t0663051-00
1H	HORVU.MOREX.r3.1HG0075320.1	=	1H	Os01t0874300-01
1H	HORVU.MOREX.r3.1HG0017050.1	=	1H	Os01t0298400-01
1H	HORVU.MOREX.r3.1HG0018590.1	=	1H	Os01t0285300-01
1H	HORVU.MOREX.r3.1HG0043220.1	=	10H	Os10t0478300-01
1H	HORVU.MOREX.r3.1HG0057900.1	=	10H	Os10t0562100-01
1H	HORVU.MOREX.r3.1HG0043220.1	=	2H	Os02t0624300-01
1H	HORVU.MOREX.r3.1HG0018590.1	=	5H	Os05t0140100-01
1H	HORVU.MOREX.r3.1HG0084760.1	=	5H	Os05t0553400-01
1H	HORVU.MOREX.r3.1HG0089600.1	=	5H	Os05t0567600-00
1H	HORVU.MOREX.r3.1HG0075320.1	=	5H	Os05t0429900-01
1H	HORVU.MOREX.r3.1HG0073480.1	=	5H	Os05t0459000-01
1H	HORVU.MOREX.r3.1HG0079700.1	=	5H	Os05t0543600-01
1H	HORVU.MOREX.r3.1HG0066390.1	=	5H	Os05t0412000-00
2H	HORVU.MOREX.r3.2HG0184160.1	=	2H	Os02t0641900-01
2H	HORVU.MOREX.r3.2HG0197540.1	=	2H	Os02t0695200-01
2H	HORVU.MOREX.r3.2HG0121480.1	=	3H	Os03t0371800-00
2H	HORVU.MOREX.r3.2HG0197540.1	=	4H	Os04t0594100-01
2H	HORVU.MOREX.r3.2HG0144990.1	=	7H	Os07t0497500-00
2H	HORVU.MOREX.r3.2HG0135680.1	=	7H	Os07t0558100-00
3H	HORVU.MOREX.r3.3HG0274520.1	=	1H	Os01t0637800-00
3H	HORVU.MOREX.r3.3HG0283250.1	=	1H	Os01t0702700-01
3H	HORVU.MOREX.r3.3HG0284070.1	=	1H	Os01t0709000-01
3H	HORVU.MOREX.r3.3HG0248740.1	=	1H	Os01t0229000-00
3H	HORVU.MOREX.r3.3HG0228120.1	=	1H	Os01t0142500-01
3H	HORVU.MOREX.r3.3HG0236520.1	=	1H	Os01t0187900-01
3H	HORVU.MOREX.r3.3HG0236690.1	=	1H	Os01t0191900-01
3H	HORVU.MOREX.r3.3HG0236900.1	=	1H	Os01t0192300-01
3H	HORVU.MOREX.r3.3HG0298680.1	=	1H	Os01t0874300-01
3H	HORVU.MOREX.r3.3HG0300210.1	=	1H	Os01t0863300-01
3H	HORVU.MOREX.r3.3HG0301170.1	=	1H	Os01t0855400-00
3H	HORVU.MOREX.r3.3HG0301430.1	=	1H	Os01t0853700-01
3H	HORVU.MOREX.r3.3HG0302660.1	=	1H	Os01t0841500-01
3H	HORVU.MOREX.r3.3HG0236520.1	=	1H	Os01t0192300-01
3H	HORVU.MOREX.r3.3HG0236900.1	=	1H	Os01t0187900-01
3H	HORVU.MOREX.r3.3HG0222330.1	=	1H	Os01t0128000-01
3H	HORVU.MOREX.r3.3HG0222600.1	=	1H	Os01t0127450-00
3H	HORVU.MOREX.r3.3HG0298680.1	=	5H	Os05t0429900-01
3H	HORVU.MOREX.r3.3HG0300210.1	=	5H	Os05t0442400-01
3H	HORVU.MOREX.r3.3HG0302660.1	=	5H	Os05t0459000-01
3H	HORVU.MOREX.r3.3HG0280840.1	=	5H	Os05t0553400-01
3H	HORVU.MOREX.r3.3HG0283250.1	=	5H	Os05t0543600-01
3H	HORVU.MOREX.r3.3HG0236520.1	=	5H	Os05t0195700-01
4H	HORVU.MOREX.r3.4HG0383040.1	=	1H	Os01t0305900-01
4H	HORVU.MOREX.r3.4HG0346020.1	=	11H	Os11t0207600-00
4H	HORVU.MOREX.r3.4HG0353430.1	=	11H	Os11t0128500-01
4H	HORVU.MOREX.r3.4HG0359060.1	=	11H	Os11t0684000-01
4H	HORVU.MOREX.r3.4HG0353430.1	=	12H	Os12t0125000-01
4H	HORVU.MOREX.r3.4HG0380990.1	=	3H	Os03t0315400-01
4H	HORVU.MOREX.r3.4HG0380990.1	=	7H	Os07t0688200-01
5H	HORVU.MOREX.r3.5HG0455320.1	=	11H	Os11t0180900-00
5H	HORVU.MOREX.r3.5HG0442330.2	=	11H	Os11t0700500-01
5H	HORVU.MOREX.r3.5HG0441760.1	=	12H	Os12t0572000-01
5H	HORVU.MOREX.r3.5HG0442330.2	=	12H	Os12t0567300-00
5H	HORVU.MOREX.r3.5HG0513490.1	=	3H	Os03t0771100-01
5H	HORVU.MOREX.r3.5HG0500520.1	=	8H	Os08t0549000-01
5H	HORVU.MOREX.r3.5HG0498910.1	=	9H	Os09t0532900-04
5H	HORVU.MOREX.r3.5HG0500520.1	=	9H	Os09t0538400-01
5H	HORVU.MOREX.r3.5HG0467660.1	=	9H	Os09t0106700-01
5H	HORVU.MOREX.r3.5HG0479070.1	=	9H	Os09t0401000-01
5H	HORVU.MOREX.r3.5HG0481700.1	=	9H	Os09t0431300-00
6H	HORVU.MOREX.r3.6HG0596330.1	=	10H	Os10t0478300-01
6H	HORVU.MOREX.r3.6HG0595270.1	=	2H	Os02t0618400-02
6H	HORVU.MOREX.r3.6HG0596330.1	=	2H	Os02t0624300-01
6H	HORVU.MOREX.r3.6HG0604730.1	=	2H	Os02t0685200-01
6H	HORVU.MOREX.r3.6HG0622080.1	=	2H	Os02t0786400-00
6H	HORVU.MOREX.r3.6HG0575580.1	=	2H	Os02t0187700-00
6H	HORVU.MOREX.r3.6HG0595270.1	=	4H	Os04t0508500-01
6H	HORVU.MOREX.r3.6HG0596330.1	=	4H	Os04t0517100-02
6H	HORVU.MOREX.r3.6HG0604730.1	=	4H	Os04t0583900-01
6H	HORVU.MOREX.r3.6HG0575580.1	=	6H	Os06t0637500-02
6H	HORVU.MOREX.r3.6HG0617370.1	=	6H	Os06t0221000-00
7H	HORVU.MOREX.r3.7HG0665260.1	=	6H	Os06t0221000-00
7H	HORVU.MOREX.r3.7HG0734500.1	=	6H	Os06t0679400-01
7H	HORVU.MOREX.r3.7HG0746520.1	=	6H	Os06t0637500-02
7H	HORVU.MOREX.r3.7HG0751030.1	=	6H	Os06t0728700-01
7H	HORVU.MOREX.r3.7HG0687560.1	=	8H	Os08t0549000-01
7H	HORVU.MOREX.r3.7HG0699010.1	=	8H	Os08t0157600-01
7H	HORVU.MOREX.r3.7HG0701080.1	=	8H	Os08t0151300-02
7H	HORVU.MOREX.r3.7HG0701130.2	=	8H	Os08t0151000-00
7H	HORVU.MOREX.r3.7HG0701420.1	=	8H	Os08t0144000-01
7H	HORVU.MOREX.r3.7HG0687560.1	=	9H	Os09t0538400-01

## Sheet: Maize
Table S6 Analysis of covariance between barley and the MYB family of maize
chromosome	HORVU.MOREX Gene ID	match	chromosome	Maize Gene ID
1H	HORVU.MOREX.r3.1HG0057900.1	=	1H	Zm00001eb023160_T001
1H	HORVU.MOREX.r3.1HG0057900.1	=	1H	Zm00001eb023780_T004
1H	HORVU.MOREX.r3.1HG0043220.1	=	1H	Zm00001eb045780_T001
1H	HORVU.MOREX.r3.1HG0017050.1	=	10H	Zm00001eb417170_T001
1H	HORVU.MOREX.r3.1HG0018590.1	=	10H	Zm00001eb417620_T001
1H	HORVU.MOREX.r3.1HG0043220.1	=	10H	Zm00001eb426670_T001
1H	HORVU.MOREX.r3.1HG0084760.1	=	3H	Zm00001eb156520_T001
1H	HORVU.MOREX.r3.1HG0075320.1	=	3H	Zm00001eb146230_T001
1H	HORVU.MOREX.r3.1HG0073480.1	=	3H	Zm00001eb148320_T003
1H	HORVU.MOREX.r3.1HG0025510.1	=	3H	Zm00001eb123770_T001
1H	HORVU.MOREX.r3.1HG0079700.1	=	3H	Zm00001eb155610_T001
1H	HORVU.MOREX.r3.1HG0017050.1	=	3H	Zm00001eb130020_T001
1H	HORVU.MOREX.r3.1HG0018590.1	=	3H	Zm00001eb129490_T001
1H	HORVU.MOREX.r3.1HG0043220.1	=	5H	Zm00001eb221780_T001
1H	HORVU.MOREX.r3.1HG0084760.1	=	6H	Zm00001eb295060_T001
1H	HORVU.MOREX.r3.1HG0089600.1	=	6H	Zm00001eb296170_T001
1H	HORVU.MOREX.r3.1HG0079700.1	=	6H	Zm00001eb294560_T001
1H	HORVU.MOREX.r3.1HG0066390.1	=	6H	Zm00001eb288080_T001
1H	HORVU.MOREX.r3.1HG0075320.1	=	6H	Zm00001eb289320_T001
1H	HORVU.MOREX.r3.1HG0031520.1	=	6H	Zm00001eb284910_T004
1H	HORVU.MOREX.r3.1HG0089600.1	=	8H	Zm00001eb344000_T001
1H	HORVU.MOREX.r3.1HG0066390.1	=	8H	Zm00001eb349450_T001
1H	HORVU.MOREX.r3.1HG0079700.1	=	8H	Zm00001eb361040_T001
1H	HORVU.MOREX.r3.1HG0075320.1	=	8H	Zm00001eb366540_T001
1H	HORVU.MOREX.r3.1HG0089600.1	=	8H	Zm00001eb359630_T001
1H	HORVU.MOREX.r3.1HG0017050.1	=	8H	Zm00001eb354750_T001
1H	HORVU.MOREX.r3.1HG0018590.1	=	8H	Zm00001eb354510_T001
1H	HORVU.MOREX.r3.1HG0079700.1	=	8H	Zm00001eb342580_T001
1H	HORVU.MOREX.r3.1HG0084760.1	=	8H	Zm00001eb360510_T001
2H	HORVU.MOREX.r3.2HG0121480.1	=	1H	Zm00001eb018070_T001
2H	HORVU.MOREX.r3.2HG0197540.1	=	10H	Zm00001eb430000_T001
2H	HORVU.MOREX.r3.2HG0135680.1	=	2H	Zm00001eb106790_T001
2H	HORVU.MOREX.r3.2HG0184160.1	=	2H	Zm00001eb075640_T001
2H	HORVU.MOREX.r3.2HG0197540.1	=	2H	Zm00001eb072200_T002
2H	HORVU.MOREX.r3.2HG0184160.1	=	5H	Zm00001eb248590_T001
2H	HORVU.MOREX.r3.2HG0121480.1	=	7H	Zm00001eb328600_T001
2H	HORVU.MOREX.r3.2HG0135680.1	=	7H	Zm00001eb324070_T001
2H	HORVU.MOREX.r3.2HG0144990.1	=	7H	Zm00001eb321920_T001
3H	HORVU.MOREX.r3.3HG0298680.1	=	3H	Zm00001eb146230_T001
3H	HORVU.MOREX.r3.3HG0300210.1	=	3H	Zm00001eb147010_T001
3H	HORVU.MOREX.r3.3HG0301430.1	=	3H	Zm00001eb147710_T001
3H	HORVU.MOREX.r3.3HG0302660.1	=	3H	Zm00001eb148320_T003
3H	HORVU.MOREX.r3.3HG0234110.1	=	3H	Zm00001eb123130_T001
3H	HORVU.MOREX.r3.3HG0222330.1	=	3H	Zm00001eb125520_T001
3H	HORVU.MOREX.r3.3HG0274520.1	=	3H	Zm00001eb158910_T001
3H	HORVU.MOREX.r3.3HG0280840.1	=	3H	Zm00001eb156520_T001
3H	HORVU.MOREX.r3.3HG0283250.1	=	3H	Zm00001eb155610_T001
3H	HORVU.MOREX.r3.3HG0284070.1	=	3H	Zm00001eb155190_T001
3H	HORVU.MOREX.r3.3HG0248740.1	=	3H	Zm00001eb119340_T004
3H	HORVU.MOREX.r3.3HG0228120.1	=	3H	Zm00001eb124630_T001
3H	HORVU.MOREX.r3.3HG0264850.1	=	3H	Zm00001eb162680_T001
3H	HORVU.MOREX.r3.3HG0280840.1	=	6H	Zm00001eb295060_T001
3H	HORVU.MOREX.r3.3HG0283250.1	=	6H	Zm00001eb294560_T001
3H	HORVU.MOREX.r3.3HG0298680.1	=	6H	Zm00001eb289320_T001
3H	HORVU.MOREX.r3.3HG0300210.1	=	6H	Zm00001eb288730_T001
3H	HORVU.MOREX.r3.3HG0280840.1	=	8H	Zm00001eb360510_T001
3H	HORVU.MOREX.r3.3HG0283250.1	=	8H	Zm00001eb361040_T001
3H	HORVU.MOREX.r3.3HG0298680.1	=	8H	Zm00001eb366540_T001
3H	HORVU.MOREX.r3.3HG0300210.1	=	8H	Zm00001eb366790_T001
3H	HORVU.MOREX.r3.3HG0301430.1	=	8H	Zm00001eb367300_T001
3H	HORVU.MOREX.r3.3HG0236520.1	=	8H	Zm00001eb337410_T002
3H	HORVU.MOREX.r3.3HG0228120.1	=	8H	Zm00001eb335680_T001
3H	HORVU.MOREX.r3.3HG0234110.1	=	8H	Zm00001eb336500_T001
3H	HORVU.MOREX.r3.3HG0236900.1	=	8H	Zm00001eb337410_T002
4H	HORVU.MOREX.r3.4HG0380990.1	=	1H	Zm00001eb015120_T001
4H	HORVU.MOREX.r3.4HG0383040.1	=	1H	Zm00001eb014260_T001
4H	HORVU.MOREX.r3.4HG0384200.1	=	1H	Zm00001eb013670_T001
4H	HORVU.MOREX.r3.4HG0359060.1	=	4H	Zm00001eb165000_T003
4H	HORVU.MOREX.r3.4HG0346020.1	=	4H	Zm00001eb168720_T001
4H	HORVU.MOREX.r3.4HG0353430.1	=	4H	Zm00001eb195850_T001
4H	HORVU.MOREX.r3.4HG0338090.1	=	5H	Zm00001eb216040_T001
4H	HORVU.MOREX.r3.4HG0383040.1	=	9H	Zm00001eb396390_T001
4H	HORVU.MOREX.r3.4HG0380990.1	=	9H	Zm00001eb395580_T001
5H	HORVU.MOREX.r3.5HG0513490.1	=	1H	Zm00001eb058880_T001
5H	HORVU.MOREX.r3.5HG0443240.1	=	1H	Zm00001eb028610_T001
5H	HORVU.MOREX.r3.5HG0441760.1	=	1H	Zm00001eb029300_T001
5H	HORVU.MOREX.r3.5HG0442330.2	=	1H	Zm00001eb028820_T004
5H	HORVU.MOREX.r3.5HG0479070.1	=	1H	Zm00001eb041860_T001
5H	HORVU.MOREX.r3.5HG0500520.1	=	2H	Zm00001eb103730_T001
5H	HORVU.MOREX.r3.5HG0481700.1	=	2H	Zm00001eb099830_T001
5H	HORVU.MOREX.r3.5HG0467660.1	=	2H	Zm00001eb095690_T001
5H	HORVU.MOREX.r3.5HG0442330.2	=	3H	Zm00001eb136720_T001
5H	HORVU.MOREX.r3.5HG0455320.1	=	3H	Zm00001eb138920_T001
5H	HORVU.MOREX.r3.5HG0442330.2	=	4H	Zm00001eb164740_T001
5H	HORVU.MOREX.r3.5HG0513490.1	=	5H	Zm00001eb213800_T002
5H	HORVU.MOREX.r3.5HG0479070.1	=	7H	Zm00001eb312120_T001
5H	HORVU.MOREX.r3.5HG0498910.1	=	7H	Zm00001eb319620_T001
5H	HORVU.MOREX.r3.5HG0481700.1	=	7H	Zm00001eb313580_T002
5H	HORVU.MOREX.r3.5HG0500520.1	=	7H	Zm00001eb332030_T001
5H	HORVU.MOREX.r3.5HG0467660.1	=	7H	Zm00001eb307400_T001
6H	HORVU.MOREX.r3.6HG0595270.1	=	10H	Zm00001eb426280_T001
6H	HORVU.MOREX.r3.6HG0596330.1	=	10H	Zm00001eb426670_T001
6H	HORVU.MOREX.r3.6HG0604730.1	=	10H	Zm00001eb428070_T001
6H	HORVU.MOREX.r3.6HG0595270.1	=	4H	Zm00001eb184890_T001
6H	HORVU.MOREX.r3.6HG0596330.1	=	4H	Zm00001eb185160_T001
6H	HORVU.MOREX.r3.6HG0604730.1	=	4H	Zm00001eb187450_T001
6H	HORVU.MOREX.r3.6HG0622080.1	=	4H	Zm00001eb192770_T001
6H	HORVU.MOREX.r3.6HG0595270.1	=	5H	Zm00001eb247370_T001
6H	HORVU.MOREX.r3.6HG0596330.1	=	5H	Zm00001eb247570_T001
6H	HORVU.MOREX.r3.6HG0604730.1	=	5H	Zm00001eb250940_T001
6H	HORVU.MOREX.r3.6HG0622080.1	=	5H	Zm00001eb257280_T001
6H	HORVU.MOREX.r3.6HG0617370.1	=	5H	Zm00001eb255300_T001
6H	HORVU.MOREX.r3.6HG0575580.1	=	5H	Zm00001eb234690_T001
6H	HORVU.MOREX.r3.6HG0596330.1	=	5H	Zm00001eb221780_T001
6H	HORVU.MOREX.r3.6HG0566060.1	=	6H	Zm00001eb273750_T001
6H	HORVU.MOREX.r3.6HG0575580.1	=	6H	Zm00001eb275490_T001
6H	HORVU.MOREX.r3.6HG0575580.1	=	9H	Zm00001eb387370_T001
7H	HORVU.MOREX.r3.7HG0687560.1	=	1H	Zm00001eb040070_T001
7H	HORVU.MOREX.r3.7HG0699010.1	=	10H	Zm00001eb415760_T001
7H	HORVU.MOREX.r3.7HG0701420.1	=	10H	Zm00001eb416530_T001
7H	HORVU.MOREX.r3.7HG0701080.1	=	10H	Zm00001eb416400_T001
7H	HORVU.MOREX.r3.7HG0701130.2	=	10H	Zm00001eb416370_T001
7H	HORVU.MOREX.r3.7HG0687560.1	=	2H	Zm00001eb103730_T001
7H	HORVU.MOREX.r3.7HG0699010.1	=	4H	Zm00001eb172450_T005
7H	HORVU.MOREX.r3.7HG0701420.1	=	4H	Zm00001eb172880_T001
7H	HORVU.MOREX.r3.7HG0665260.1	=	5H	Zm00001eb255300_T001
7H	HORVU.MOREX.r3.7HG0751030.1	=	5H	Zm00001eb228670_T002
7H	HORVU.MOREX.r3.7HG0746520.1	=	6H	Zm00001eb275490_T001
7H	HORVU.MOREX.r3.7HG0734500.1	=	6H	Zm00001eb273750_T001
7H	HORVU.MOREX.r3.7HG0687560.1	=	7H	Zm00001eb332030_T001
7H	HORVU.MOREX.r3.7HG0746520.1	=	9H	Zm00001eb387370_T001
