# Supplementary material for: Comparative genomics analysis of the MYB gene family in barley: preliminary insights into evolution and biological function in Blue Qingke
Source: PeerJ. 2024 Dec 2;12:e18443. doi: 10.7717/peerj.18443 (PMC11619697; doi:10.7717/peerj.18443)
Supplement: Supplemental Information 8 [file peerj-12-18443-s008.xlsx]

## Sheet: Sheet1
Table S7 Raw data for cis acting elements
Gene id	element	sequence	position	number	chain	species	function
HORVU.MOREX.r3.1HG0017050.1	MYC	CAATTG	735	6	+	Arabidopsis thaliana
HORVU.MOREX.r3.1HG0017050.1	Myb-binding site	CAACAG	232	6	+	Nicotiana tabacum
HORVU.MOREX.r3.1HG0017050.1	circadian	CAAAGATATC	1359	9	+	Lycopersicon esculentum	cis-acting regulatory element involved in circadian control
HORVU.MOREX.r3.1HG0017050.1	MYB recognition site	CCGTTG	163	6	+	Arabidopsis thaliana
HORVU.MOREX.r3.1HG0017050.1	MYB recognition site	CCGTTG	1647	6	+	Arabidopsis thaliana
HORVU.MOREX.r3.1HG0017050.1	I-box	cGATAAGGCG	140	9	+	Zea mays	part of a light responsive element
HORVU.MOREX.r3.1HG0017050.1	I-box	GTATAAGGCC	1765	9	-	Larix laricina	part of a light responsive element
HORVU.MOREX.r3.1HG0017050.1	3-AF1 binding site	TAAGAGAGGAA	830	10	+	Solanum tuberosum	light responsive element
HORVU.MOREX.r3.1HG0017050.1	Sp1	GGGCGG	70	6	+	Oryza sativa	light responsive element
HORVU.MOREX.r3.1HG0017050.1	Sp1	GGGCGG	661	6	+	Oryza sativa	light responsive element
HORVU.MOREX.r3.1HG0017050.1	Sp1	GGGCGG	954	6	-	Oryza sativa	light responsive element
HORVU.MOREX.r3.1HG0017050.1	O2-site	GATGA(C/T)(A/G)TG(A/G)	1263	8	+	Zea mays	cis-acting regulatory element involved in zein metabolism regulation
HORVU.MOREX.r3.1HG0017050.1	TCA	TCATCTTCAT	329	9	-	Pisum sativum
HORVU.MOREX.r3.1HG0017050.1	TCA	TCATCTTCAT	591	10	-	Pisum sativum
HORVU.MOREX.r3.1HG0017050.1	CCGTCC motif	CCGTCC	1688	6	-	Nicotiana tabacum
HORVU.MOREX.r3.1HG0017050.1	Unnamed__4	CTCC	110	4	-	Petroselinum hortense
HORVU.MOREX.r3.1HG0017050.1	Unnamed__4	CTCC	267	4	-	Petroselinum hortense
HORVU.MOREX.r3.1HG0017050.1	Unnamed__4	CTCC	398	4	-	Petroselinum hortense
HORVU.MOREX.r3.1HG0017050.1	Unnamed__4	CTCC	414	4	-	Petroselinum hortense
HORVU.MOREX.r3.1HG0017050.1	Unnamed__4	CTCC	527	4	-	Petroselinum hortense
HORVU.MOREX.r3.1HG0017050.1	Unnamed__4	CTCC	755	4	-	Petroselinum hortense
HORVU.MOREX.r3.1HG0017050.1	Unnamed__4	CTCC	763	4	-	Petroselinum hortense
HORVU.MOREX.r3.1HG0017050.1	Unnamed__4	CTCC	945	4	-	Petroselinum hortense
HORVU.MOREX.r3.1HG0017050.1	Unnamed__4	CTCC	1101	4	-	Petroselinum hortense
HORVU.MOREX.r3.1HG0017050.1	Unnamed__4	CTCC	1130	4	+	Petroselinum hortense
HORVU.MOREX.r3.1HG0017050.1	Unnamed__4	CTCC	1334	4	+	Petroselinum hortense
HORVU.MOREX.r3.1HG0017050.1	Unnamed__4	CTCC	1593	4	+	Petroselinum hortense
HORVU.MOREX.r3.1HG0017050.1	Unnamed__4	CTCC	1597	4	+	Petroselinum hortense
HORVU.MOREX.r3.1HG0017050.1	Unnamed__4	CTCC	1601	4	-	Petroselinum hortense
HORVU.MOREX.r3.1HG0017050.1	Unnamed__4	CTCC	1614	4	-	Petroselinum hortense
HORVU.MOREX.r3.1HG0017050.1	Unnamed__4	CTCC	1642	4	+	Petroselinum hortense
HORVU.MOREX.r3.1HG0017050.1	Unnamed__4	CTCC	1852	4	+	Petroselinum hortense
HORVU.MOREX.r3.1HG0017050.1	Unnamed__4	CTCC	1892	4	+	Petroselinum hortense
HORVU.MOREX.r3.1HG0017050.1	Unnamed__1	CGTGG	116	5	-	Zea mays
HORVU.MOREX.r3.1HG0017050.1	Unnamed__1	CGTGG	260	5	+	Zea mays
HORVU.MOREX.r3.1HG0017050.1	Unnamed__1	CGTGG	630	5	+	Zea mays
HORVU.MOREX.r3.1HG0017050.1	Unnamed__1	CGTGG	923	5	+	Zea mays
HORVU.MOREX.r3.1HG0017050.1	W box	TTGACC	1668	6	-	Arabidopsis thaliana
HORVU.MOREX.r3.1HG0017050.1	W box	TTGACC	1921	6	-	Arabidopsis thaliana
HORVU.MOREX.r3.1HG0017050.1	LTR	CCGAAA	1224	6	+	Hordeum vulgare	cis-acting element involved in low-temperature responsiveness
HORVU.MOREX.r3.1HG0017050.1	STRE	AGGGG	68	5	+	Arabidopsis thaliana
HORVU.MOREX.r3.1HG0017050.1	STRE	AGGGG	181	5	+	Arabidopsis thaliana
HORVU.MOREX.r3.1HG0017050.1	STRE	AGGGG	197	5	+	Arabidopsis thaliana
HORVU.MOREX.r3.1HG0017050.1	STRE	AGGGG	512	5	+	Arabidopsis thaliana
HORVU.MOREX.r3.1HG0017050.1	STRE	AGGGG	1759	5	-	Arabidopsis thaliana
HORVU.MOREX.r3.1HG0017050.1	AT~TATA-box	TATATA	1384	6	-	Arabidopsis thaliana
HORVU.MOREX.r3.1HG0017050.1	AT~TATA-box	TATATA	1412	6	-	Arabidopsis thaliana
HORVU.MOREX.r3.1HG0017050.1	AT~TATA-box	TATATA	1857	6	-	Arabidopsis thaliana
HORVU.MOREX.r3.1HG0017050.1	TC-rich repeats	GTTTTCTTAC	1707	9	+	Nicotiana tabacum	cis-acting element involved in defense and stress responsiveness
HORVU.MOREX.r3.1HG0017050.1	A-box	CCGTCC	1688	6	-	Petroselinum crispum	cis-acting regulatory element
HORVU.MOREX.r3.1HG0017050.1	MYB	CAACAG	232	6	+	Arabidopsis thaliana
HORVU.MOREX.r3.1HG0017050.1	MYB	CAACCA	812	6	+	Arabidopsis thaliana
HORVU.MOREX.r3.1HG0017050.1	MYB	CAACCA	1313	6	+	Arabidopsis thaliana
HORVU.MOREX.r3.1HG0017050.1	MYB	CAACCA	1805	6	+	Arabidopsis thaliana
HORVU.MOREX.r3.1HG0017050.1	TATA-box	TATA	1093	4	-	Arabidopsis thaliana	core promoter element around -30 of transcription start
HORVU.MOREX.r3.1HG0017050.1	TATA-box	ATTATA	1142	6	+	Brassica napus	core promoter element around -30 of transcription start
HORVU.MOREX.r3.1HG0017050.1	TATA-box	TATAA	1143	5	-	Arabidopsis thaliana	core promoter element around -30 of transcription start
HORVU.MOREX.r3.1HG0017050.1	TATA-box	TATA	1144	4	-	Arabidopsis thaliana	core promoter element around -30 of transcription start
HORVU.MOREX.r3.1HG0017050.1	TATA-box	TATA	1352	4	-	Arabidopsis thaliana	core promoter element around -30 of transcription start
HORVU.MOREX.r3.1HG0017050.1	TATA-box	ATATAT	1362	6	-	Brassica napus	core promoter element around -30 of transcription start
HORVU.MOREX.r3.1HG0017050.1	TATA-box	TATA	1363	4	-	Arabidopsis thaliana	core promoter element around -30 of transcription start
HORVU.MOREX.r3.1HG0017050.1	TATA-box	TATATAA	1383	7	-	Arabidopsis thaliana	core promoter element around -30 of transcription start
HORVU.MOREX.r3.1HG0017050.1	TATA-box	TATATA	1384	6	-	Arabidopsis thaliana	core promoter element around -30 of transcription start
HORVU.MOREX.r3.1HG0017050.1	TATA-box	ATATAT	1385	6	-	Brassica napus	core promoter element around -30 of transcription start
HORVU.MOREX.r3.1HG0017050.1	TATA-box	TATA	1386	4	-	Arabidopsis thaliana	core promoter element around -30 of transcription start
HORVU.MOREX.r3.1HG0017050.1	TATA-box	ccTATAAAaa	1395	9	+	Arabidopsis thaliana	core promoter element around -30 of transcription start
HORVU.MOREX.r3.1HG0017050.1	TATA-box	TATATAA	1411	7	-	Arabidopsis thaliana	core promoter element around -30 of transcription start
HORVU.MOREX.r3.1HG0017050.1	TATA-box	TATATA	1412	6	-	Arabidopsis thaliana	core promoter element around -30 of transcription start
HORVU.MOREX.r3.1HG0017050.1	TATA-box	ATATAT	1413	6	-	Brassica napus	core promoter element around -30 of transcription start
HORVU.MOREX.r3.1HG0017050.1	TATA-box	TATA	1414	4	-	Arabidopsis thaliana	core promoter element around -30 of transcription start
HORVU.MOREX.r3.1HG0017050.1	TATA-box	TATAA	1444	5	-	Arabidopsis thaliana	core promoter element around -30 of transcription start
HORVU.MOREX.r3.1HG0017050.1	TATA-box	TATA	1445	4	-	Arabidopsis thaliana	core promoter element around -30 of transcription start
HORVU.MOREX.r3.1HG0017050.1	TATA-box	ATATAA	1453	6	+	Brassica oleracea	core promoter element around -30 of transcription start
HORVU.MOREX.r3.1HG0017050.1	TATA-box	TATA	1454	4	-	Arabidopsis thaliana	core promoter element around -30 of transcription start
HORVU.MOREX.r3.1HG0017050.1	TATA-box	ATTATA	1459	6	+	Brassica napus	core promoter element around -30 of transcription start
HORVU.MOREX.r3.1HG0017050.1	TATA-box	TATAA	1460	5	-	Arabidopsis thaliana	core promoter element around -30 of transcription start
HORVU.MOREX.r3.1HG0017050.1	TATA-box	TATA	1461	4	-	Arabidopsis thaliana	core promoter element around -30 of transcription start
HORVU.MOREX.r3.1HG0017050.1	TATA-box	TACAAAA	1500	7	+	Oryza sativa	core promoter element around -30 of transcription start
HORVU.MOREX.r3.1HG0017050.1	TATA-box	TATAAA	1768	6	-	Helianthus annuus	core promoter element around -30 of transcription start
HORVU.MOREX.r3.1HG0017050.1	TATA-box	TATAA	1769	5	-	Arabidopsis thaliana	core promoter element around -30 of transcription start
HORVU.MOREX.r3.1HG0017050.1	TATA-box	TATA	1770	4	-	Arabidopsis thaliana	core promoter element around -30 of transcription start
HORVU.MOREX.r3.1HG0017050.1	TATA-box	ccTATAAAaa	1855	9	+	Arabidopsis thaliana	core promoter element around -30 of transcription start
HORVU.MOREX.r3.1HG0017050.1	TATA-box	TATATA	1857	6	-	Arabidopsis thaliana	core promoter element around -30 of transcription start
HORVU.MOREX.r3.1HG0017050.1	TATA-box	ATATAA	1858	6	+	Brassica oleracea	core promoter element around -30 of transcription start
HORVU.MOREX.r3.1HG0017050.1	TATA-box	TATA	1859	4	-	Arabidopsis thaliana	core promoter element around -30 of transcription start
HORVU.MOREX.r3.1HG0017050.1	CGTCA-motif	CGTCA	127	5	+	Hordeum vulgare	cis-acting regulatory element involved in the MeJA-responsiveness
HORVU.MOREX.r3.1HG0017050.1	CGTCA-motif	CGTCA	257	5	-	Hordeum vulgare	cis-acting regulatory element involved in the MeJA-responsiveness
HORVU.MOREX.r3.1HG0017050.1	CGTCA-motif	CGTCA	336	5	-	Hordeum vulgare	cis-acting regulatory element involved in the MeJA-responsiveness
HORVU.MOREX.r3.1HG0017050.1	CGTCA-motif	CGTCA	489	5	+	Hordeum vulgare	cis-acting regulatory element involved in the MeJA-responsiveness
HORVU.MOREX.r3.1HG0017050.1	CGTCA-motif	CGTCA	680	5	-	Hordeum vulgare	cis-acting regulatory element involved in the MeJA-responsiveness
HORVU.MOREX.r3.1HG0017050.1	CGTCA-motif	CGTCA	689	5	-	Hordeum vulgare	cis-acting regulatory element involved in the MeJA-responsiveness
HORVU.MOREX.r3.1HG0017050.1	CGTCA-motif	CGTCA	984	5	-	Hordeum vulgare	cis-acting regulatory element involved in the MeJA-responsiveness
HORVU.MOREX.r3.1HG0017050.1	G-box	CACGTC	258	6	-	Zea mays	cis-acting regulatory element involved in light responsiveness
HORVU.MOREX.r3.1HG0017050.1	G-box	CACGTC	921	6	-	Zea mays	cis-acting regulatory element involved in light responsiveness
HORVU.MOREX.r3.1HG0017050.1	WRE3	CCACCT	602	6	-	Pisum sativum
HORVU.MOREX.r3.1HG0017050.1	WRE3	CCACCT	1674	6	-	Pisum sativum
HORVU.MOREX.r3.1HG0017050.1	E2Fb	TTTGCCGC	1576	8	-	Nicotiana tabacum
HORVU.MOREX.r3.1HG0017050.1	Unnamed__6	taTAAATATct	1137	10	-	Zea mays
HORVU.MOREX.r3.1HG0017050.1	CCAAT-box	CAACGG	163	6	-	Hordeum vulgare	MYBHv1 binding site
HORVU.MOREX.r3.1HG0017050.1	CCAAT-box	CAACGG	1647	6	-	Hordeum vulgare	MYBHv1 binding site
HORVU.MOREX.r3.1HG0017050.1		motif_sequence	200	4	-	organism	short_function
HORVU.MOREX.r3.1HG0017050.1		motif_sequence	593	4	-	organism	short_function
HORVU.MOREX.r3.1HG0017050.1		motif_sequence	651	4	-	organism	short_function
HORVU.MOREX.r3.1HG0017050.1		motif_sequence	667	4	-	organism	short_function
HORVU.MOREX.r3.1HG0017050.1		motif_sequence	727	4	-	organism	short_function
HORVU.MOREX.r3.1HG0017050.1		motif_sequence	758	4	-	organism	short_function
HORVU.MOREX.r3.1HG0017050.1		motif_sequence	830	4	-	organism	short_function
HORVU.MOREX.r3.1HG0017050.1		motif_sequence	1128	4	+	organism	short_function
HORVU.MOREX.r3.1HG0017050.1		motif_sequence	1332	4	+	organism	short_function
HORVU.MOREX.r3.1HG0017050.1		motif_sequence	1545	4	+	organism	short_function
HORVU.MOREX.r3.1HG0017050.1		motif_sequence	1591	4	+	organism	short_function
HORVU.MOREX.r3.1HG0017050.1		motif_sequence	1640	4	+	organism	short_function
HORVU.MOREX.r3.1HG0017050.1		motif_sequence	1878	4	+	organism	short_function
HORVU.MOREX.r3.1HG0017050.1		motif_sequence	1890	4	+	organism	short_function
HORVU.MOREX.r3.1HG0017050.1	CAAT-box	CAAT	131	4	-	Nicotiana glutinosa
HORVU.MOREX.r3.1HG0017050.1	CAAT-box	CAAT	153	4	+	Nicotiana glutinosa
HORVU.MOREX.r3.1HG0017050.1	CAAT-box	CAAAT	210	5	+	Pisum sativum	common cis-acting element in promoter and enhancer regions
HORVU.MOREX.r3.1HG0017050.1	CAAT-box	CAAT	293	4	+	Nicotiana glutinosa
HORVU.MOREX.r3.1HG0017050.1	CAAT-box	CCAAT	390	5	-	Arabidopsis thaliana	common cis-acting element in promoter and enhancer regions
HORVU.MOREX.r3.1HG0017050.1	CAAT-box	CCAAT	734	5	+	Arabidopsis thaliana	common cis-acting element in promoter and enhancer regions
HORVU.MOREX.r3.1HG0017050.1	CAAT-box	CAAT	735	4	+	Nicotiana glutinosa
HORVU.MOREX.r3.1HG0017050.1	CAAT-box	CCAAT	737	5	-	Arabidopsis thaliana	common cis-acting element in promoter and enhancer regions
HORVU.MOREX.r3.1HG0017050.1	CAAT-box	CAAT	1074	4	-	Nicotiana glutinosa
HORVU.MOREX.r3.1HG0017050.1	CAAT-box	CAAAT	1267	5	-	Pisum sativum	common cis-acting element in promoter and enhancer regions
HORVU.MOREX.r3.1HG0017050.1	CAAT-box	CAAAT	1344	5	+	Pisum sativum	common cis-acting element in promoter and enhancer regions
HORVU.MOREX.r3.1HG0017050.1	CAAT-box	CAAAT	1359	5	+	Pisum sativum	common cis-acting element in promoter and enhancer regions
HORVU.MOREX.r3.1HG0017050.1	CAAT-box	CAAT	1428	4	+	Nicotiana glutinosa
HORVU.MOREX.r3.1HG0017050.1	CAAT-box	CAAT	1474	4	-	Nicotiana glutinosa
HORVU.MOREX.r3.1HG0017050.1	CAAT-box	CAAAT	1780	5	+	Pisum sativum	common cis-acting element in promoter and enhancer regions
HORVU.MOREX.r3.1HG0017050.1	CAAT-box	CAAT	1795	4	-	Nicotiana glutinosa
HORVU.MOREX.r3.1HG0017050.1	CAAT-box	CAAT	1924	4	+	Nicotiana glutinosa
HORVU.MOREX.r3.1HG0017050.1	CAAT-box	CCAAT	1930	5	+	Arabidopsis thaliana	common cis-acting element in promoter and enhancer regions
HORVU.MOREX.r3.1HG0017050.1	CAAT-box	CAAT	1931	4	+	Nicotiana glutinosa
HORVU.MOREX.r3.1HG0017050.1	TCCC-motif	TCTCCCT	1592	7	+	Spinacia oleracea	part of a light responsive element
HORVU.MOREX.r3.1HG0017050.1	CTAG-motif	ACTAGCAGAA	1435	9	-	Avena sativa
HORVU.MOREX.r3.1HG0017050.1	as-1	TGACG	127	5	-	Arabidopsis thaliana
HORVU.MOREX.r3.1HG0017050.1	as-1	TGACG	257	5	+	Arabidopsis thaliana
HORVU.MOREX.r3.1HG0017050.1	as-1	TGACG	336	5	+	Arabidopsis thaliana
HORVU.MOREX.r3.1HG0017050.1	as-1	TGACG	489	5	-	Arabidopsis thaliana
HORVU.MOREX.r3.1HG0017050.1	as-1	TGACG	680	5	+	Arabidopsis thaliana
HORVU.MOREX.r3.1HG0017050.1	as-1	TGACG	689	5	+	Arabidopsis thaliana
HORVU.MOREX.r3.1HG0017050.1	as-1	TGACG	984	5	+	Arabidopsis thaliana
HORVU.MOREX.r3.1HG0017050.1	box S	AGCCACC	992	7	-	Arabidopsis thaliana
HORVU.MOREX.r3.1HG0017050.1	MRE	AACCTAA	796	7	+	Petroselinum crispum	MYB binding site involved in light responsiveness
HORVU.MOREX.r3.1HG0017050.1	GC-motif	CCCCCG	314	6	-	Zea mays	enhancer-like element involved in anoxic specific inducibility
HORVU.MOREX.r3.1HG0017050.1	AE-box	AGAAACTT	1005	8	+	Arabidopsis thaliana	part of a module for light response
HORVU.MOREX.r3.1HG0017050.1	TGACG-motif	TGACG	127	5	-	Hordeum vulgare	cis-acting regulatory element involved in the MeJA-responsiveness
HORVU.MOREX.r3.1HG0017050.1	TGACG-motif	TGACG	257	5	+	Hordeum vulgare	cis-acting regulatory element involved in the MeJA-responsiveness
HORVU.MOREX.r3.1HG0017050.1	TGACG-motif	TGACG	336	5	+	Hordeum vulgare	cis-acting regulatory element involved in the MeJA-responsiveness
HORVU.MOREX.r3.1HG0017050.1	TGACG-motif	TGACG	489	5	-	Hordeum vulgare	cis-acting regulatory element involved in the MeJA-responsiveness
HORVU.MOREX.r3.1HG0017050.1	TGACG-motif	TGACG	680	5	+	Hordeum vulgare	cis-acting regulatory element involved in the MeJA-responsiveness
HORVU.MOREX.r3.1HG0017050.1	TGACG-motif	TGACG	689	5	+	Hordeum vulgare	cis-acting regulatory element involved in the MeJA-responsiveness
HORVU.MOREX.r3.1HG0017050.1	TGACG-motif	TGACG	984	5	+	Hordeum vulgare	cis-acting regulatory element involved in the MeJA-responsiveness
HORVU.MOREX.r3.1HG0017050.1	ABRE	ACGTG	259	5	+	Arabidopsis thaliana	cis-acting element involved in the abscisic acid responsiveness
HORVU.MOREX.r3.1HG0017050.1	ABRE	ACGTG	922	5	+	Arabidopsis thaliana	cis-acting element involved in the abscisic acid responsiveness
HORVU.MOREX.r3.1HG0017050.1	CCGTCC-box	CCGTCC	1688	6	-	Petroselinum hortense
HORVU.MOREX.r3.1HG0017050.1	DRE core	GCCGAC	418	6	+	Arabidopsis thaliana
HORVU.MOREX.r3.1HG0017050.1	DRE core	GCCGAC	517	6	+	Arabidopsis thaliana
HORVU.MOREX.r3.1HG0017050.1	DRE core	GCCGAC	559	6	+	Arabidopsis thaliana
HORVU.MOREX.r3.1HG0017050.1	DRE core	GCCGAC	577	6	+	Arabidopsis thaliana
HORVU.MOREX.r3.1HG0017050.1	DRE core	GCCGAC	949	6	+	Arabidopsis thaliana
HORVU.MOREX.r3.1HG0017050.1	DRE core	GCCGAC	1829	6	-	Arabidopsis thaliana
HORVU.MOREX.r3.1HG0018590.1	circadian	CAAAGATATC	868	9	+	Lycopersicon esculentum	cis-acting regulatory element involved in circadian control
HORVU.MOREX.r3.1HG0018590.1	AuxRR-core	GGTCCAT	655	7	-	Nicotiana tabacum	cis-acting regulatory element involved in auxin responsiveness
HORVU.MOREX.r3.1HG0018590.1	I-box	AAGATAAGGCT	1292	10	+	Gossypium hirsutum	part of a light responsive element
HORVU.MOREX.r3.1HG0018590.1	MYB recognition site	CCGTTG	1060	6	-	Arabidopsis thaliana
HORVU.MOREX.r3.1HG0018590.1	GT1-motif	GGTTAAT	209	7	-	Avena sativa	light responsive element
HORVU.MOREX.r3.1HG0018590.1	GT1-motif	GGTTAA	210	6	-	Arabidopsis thaliana	light responsive element
HORVU.MOREX.r3.1HG0018590.1	GT1-motif	GGTTAA	1644	6	+	Arabidopsis thaliana	light responsive element
HORVU.MOREX.r3.1HG0018590.1	MYC	CATGTG	489	6	-	Arabidopsis thaliana
HORVU.MOREX.r3.1HG0018590.1	MYC	CATGTG	1128	6	-	Arabidopsis thaliana
HORVU.MOREX.r3.1HG0018590.1	Unnamed__4	CTCC	38	4	-	Petroselinum hortense
HORVU.MOREX.r3.1HG0018590.1	Unnamed__4	CTCC	188	4	-	Petroselinum hortense
HORVU.MOREX.r3.1HG0018590.1	Unnamed__4	CTCC	265	4	-	Petroselinum hortense
HORVU.MOREX.r3.1HG0018590.1	Unnamed__4	CTCC	281	4	+	Petroselinum hortense
HORVU.MOREX.r3.1HG0018590.1	Unnamed__4	CTCC	290	4	+	Petroselinum hortense
HORVU.MOREX.r3.1HG0018590.1	Unnamed__4	CTCC	339	4	+	Petroselinum hortense
HORVU.MOREX.r3.1HG0018590.1	Unnamed__4	CTCC	650	4	+	Petroselinum hortense
HORVU.MOREX.r3.1HG0018590.1	Unnamed__4	CTCC	847	4	+	Petroselinum hortense
HORVU.MOREX.r3.1HG0018590.1	Unnamed__4	CTCC	861	4	-	Petroselinum hortense
HORVU.MOREX.r3.1HG0018590.1	Unnamed__4	CTCC	914	4	+	Petroselinum hortense
HORVU.MOREX.r3.1HG0018590.1	Unnamed__4	CTCC	931	4	-	Petroselinum hortense
HORVU.MOREX.r3.1HG0018590.1	Unnamed__4	CTCC	978	4	+	Petroselinum hortense
HORVU.MOREX.r3.1HG0018590.1	Unnamed__4	CTCC	1064	4	-	Petroselinum hortense
HORVU.MOREX.r3.1HG0018590.1	Unnamed__4	CTCC	1206	4	+	Petroselinum hortense
HORVU.MOREX.r3.1HG0018590.1	Unnamed__4	CTCC	1316	4	-	Petroselinum hortense
HORVU.MOREX.r3.1HG0018590.1	Unnamed__4	CTCC	1319	4	-	Petroselinum hortense
HORVU.MOREX.r3.1HG0018590.1	Unnamed__4	CTCC	1322	4	-	Petroselinum hortense
HORVU.MOREX.r3.1HG0018590.1	Unnamed__4	CTCC	1325	4	-	Petroselinum hortense
HORVU.MOREX.r3.1HG0018590.1	Unnamed__4	CTCC	1328	4	-	Petroselinum hortense
HORVU.MOREX.r3.1HG0018590.1	Unnamed__4	CTCC	1331	4	-	Petroselinum hortense
HORVU.MOREX.r3.1HG0018590.1	Unnamed__4	CTCC	1359	4	-	Petroselinum hortense
HORVU.MOREX.r3.1HG0018590.1	Unnamed__4	CTCC	1385	4	-	Petroselinum hortense
HORVU.MOREX.r3.1HG0018590.1	Unnamed__4	CTCC	1391	4	-	Petroselinum hortense
HORVU.MOREX.r3.1HG0018590.1	Unnamed__4	CTCC	1478	4	-	Petroselinum hortense
HORVU.MOREX.r3.1HG0018590.1	Unnamed__4	CTCC	1539	4	-	Petroselinum hortense
HORVU.MOREX.r3.1HG0018590.1	Unnamed__4	CTCC	1584	4	-	Petroselinum hortense
HORVU.MOREX.r3.1HG0018590.1	Unnamed__4	CTCC	1675	4	+	Petroselinum hortense
HORVU.MOREX.r3.1HG0018590.1	Unnamed__4	CTCC	1711	4	-	Petroselinum hortense
HORVU.MOREX.r3.1HG0018590.1	Unnamed__4	CTCC	1734	4	-	Petroselinum hortense
HORVU.MOREX.r3.1HG0018590.1	Unnamed__4	CTCC	1739	4	-	Petroselinum hortense
HORVU.MOREX.r3.1HG0018590.1	Unnamed__4	CTCC	1777	4	+	Petroselinum hortense
HORVU.MOREX.r3.1HG0018590.1	Unnamed__4	CTCC	1844	4	+	Petroselinum hortense
HORVU.MOREX.r3.1HG0018590.1	Unnamed__4	CTCC	1924	4	-	Petroselinum hortense
HORVU.MOREX.r3.1HG0018590.1	CCGTCC motif	CCGTCC	849	6	+	Nicotiana tabacum
HORVU.MOREX.r3.1HG0018590.1	Myb	CAACTG	991	6	+	Arabidopsis thaliana
HORVU.MOREX.r3.1HG0018590.1	Myb	CAACTG	1803	6	-	Arabidopsis thaliana
HORVU.MOREX.r3.1HG0018590.1	Sp1	GGGCGG	1381	6	+	Oryza sativa	light responsive element
HORVU.MOREX.r3.1HG0018590.1	MBS	CAACTG	991	6	+	Arabidopsis thaliana	MYB binding site involved in drought-inducibility
HORVU.MOREX.r3.1HG0018590.1	MBS	CAACTG	1803	6	-	Arabidopsis thaliana	MYB binding site involved in drought-inducibility
HORVU.MOREX.r3.1HG0018590.1	GCN4_motif	TGAGTCA	606	7	-	Oryza sativa	cis-regulatory element involved in endosperm expression
HORVU.MOREX.r3.1HG0018590.1	AT~TATA-box	TATATA	1849	6	-	Arabidopsis thaliana
HORVU.MOREX.r3.1HG0018590.1	Unnamed__1	CGTGG	217	5	-	Zea mays
HORVU.MOREX.r3.1HG0018590.1	Unnamed__1	CGTGG	1365	5	+	Zea mays
HORVU.MOREX.r3.1HG0018590.1	Unnamed__1	CGTGG	1611	5	-	Zea mays
HORVU.MOREX.r3.1HG0018590.1	STRE	AGGGG	647	5	-	Arabidopsis thaliana
HORVU.MOREX.r3.1HG0018590.1	STRE	AGGGG	1653	5	-	Arabidopsis thaliana
HORVU.MOREX.r3.1HG0018590.1	STRE	AGGGG	1713	5	+	Arabidopsis thaliana
HORVU.MOREX.r3.1HG0018590.1	STRE	AGGGG	1746	5	-	Arabidopsis thaliana
HORVU.MOREX.r3.1HG0018590.1	STRE	AGGGG	1881	5	-	Arabidopsis thaliana
HORVU.MOREX.r3.1HG0018590.1	P-box	CCTTTTG	123	7	-	Oryza sativa	gibberellin-responsive element
HORVU.MOREX.r3.1HG0018590.1	P-box	CCTTTTG	925	7	-	Oryza sativa	gibberellin-responsive element
HORVU.MOREX.r3.1HG0018590.1	A-box	CCGTCC	849	6	+	Petroselinum crispum	cis-acting regulatory element
HORVU.MOREX.r3.1HG0018590.1	MYB	CAACCA	1628	6	+	Arabidopsis thaliana
HORVU.MOREX.r3.1HG0018590.1	MYB	CAACCA	1668	6	+	Arabidopsis thaliana
HORVU.MOREX.r3.1HG0018590.1	MYB	CAACCA	1787	6	+	Arabidopsis thaliana
HORVU.MOREX.r3.1HG0018590.1	ABRE4	CACGTA	593	6	-	Zea mays
HORVU.MOREX.r3.1HG0018590.1	G-Box	CACGTT	841	6	-	Pisum sativum	cis-acting regulatory element involved in light responsiveness
HORVU.MOREX.r3.1HG0018590.1	WRE3	CCACCT	968	6	+	Pisum sativum
HORVU.MOREX.r3.1HG0018590.1	WRE3	CCACCT	1107	6	-	Pisum sativum
HORVU.MOREX.r3.1HG0018590.1	WRE3	CCACCT	1190	6	-	Pisum sativum
HORVU.MOREX.r3.1HG0018590.1	WRE3	CCACCT	1671	6	+	Pisum sativum
HORVU.MOREX.r3.1HG0018590.1	WRE3	CCACCT	1686	6	+	Pisum sativum
HORVU.MOREX.r3.1HG0018590.1	G-box	TACGTG	593	6	+	Arabidopsis thaliana	cis-acting regulatory element involved in light responsiveness
HORVU.MOREX.r3.1HG0018590.1	G-box	CACGAC	1363	6	-	Zea mays	cis-acting regulatory element involved in light responsiveness
HORVU.MOREX.r3.1HG0018590.1	TATA-box	TACAAAA	664	7	-	Oryza sativa	core promoter element around -30 of transcription start
HORVU.MOREX.r3.1HG0018590.1	TATA-box	ATTATA	791	6	+	Brassica napus	core promoter element around -30 of transcription start
HORVU.MOREX.r3.1HG0018590.1	TATA-box	TATAA	792	5	-	Arabidopsis thaliana	core promoter element around -30 of transcription start
HORVU.MOREX.r3.1HG0018590.1	TATA-box	TATA	793	4	+	Arabidopsis thaliana	core promoter element around -30 of transcription start
HORVU.MOREX.r3.1HG0018590.1	TATA-box	ATATAT	1848	6	-	Brassica napus	core promoter element around -30 of transcription start
HORVU.MOREX.r3.1HG0018590.1	TATA-box	TATATA	1849	6	-	Arabidopsis thaliana	core promoter element around -30 of transcription start
HORVU.MOREX.r3.1HG0018590.1	TATA-box	ATATAA	1850	6	+	Brassica oleracea	core promoter element around -30 of transcription start
HORVU.MOREX.r3.1HG0018590.1	TATA-box	TATA	1851	4	-	Arabidopsis thaliana	core promoter element around -30 of transcription start
HORVU.MOREX.r3.1HG0018590.1	TATA-box	TATA	1861	4	-	Arabidopsis thaliana	core promoter element around -30 of transcription start
HORVU.MOREX.r3.1HG0018590.1	CGTCA-motif	CGTCA	735	5	-	Hordeum vulgare	cis-acting regulatory element involved in the MeJA-responsiveness
HORVU.MOREX.r3.1HG0018590.1	CGTCA-motif	CGTCA	1008	5	-	Hordeum vulgare	cis-acting regulatory element involved in the MeJA-responsiveness
HORVU.MOREX.r3.1HG0018590.1	CGTCA-motif	CGTCA	1249	5	-	Hordeum vulgare	cis-acting regulatory element involved in the MeJA-responsiveness
HORVU.MOREX.r3.1HG0018590.1	CGTCA-motif	CGTCA	1591	5	-	Hordeum vulgare	cis-acting regulatory element involved in the MeJA-responsiveness
HORVU.MOREX.r3.1HG0018590.1		motif_sequence	265	4	-	organism	short_function
HORVU.MOREX.r3.1HG0018590.1		motif_sequence	269	4	+	organism	short_function
HORVU.MOREX.r3.1HG0018590.1		motif_sequence	322	4	-	organism	short_function
HORVU.MOREX.r3.1HG0018590.1		motif_sequence	568	4	-	organism	short_function
HORVU.MOREX.r3.1HG0018590.1		motif_sequence	626	4	+	organism	short_function
HORVU.MOREX.r3.1HG0018590.1		motif_sequence	822	4	-	organism	short_function
HORVU.MOREX.r3.1HG0018590.1		motif_sequence	931	4	-	organism	short_function
HORVU.MOREX.r3.1HG0018590.1		motif_sequence	942	4	+	organism	short_function
HORVU.MOREX.r3.1HG0018590.1		motif_sequence	956	4	-	organism	short_function
HORVU.MOREX.r3.1HG0018590.1		motif_sequence	1064	4	-	organism	short_function
HORVU.MOREX.r3.1HG0018590.1		motif_sequence	1127	4	-	organism	short_function
HORVU.MOREX.r3.1HG0018590.1		motif_sequence	1418	4	-	organism	short_function
HORVU.MOREX.r3.1HG0018590.1		motif_sequence	1453	4	+	organism	short_function
HORVU.MOREX.r3.1HG0018590.1		motif_sequence	1481	4	-	organism	short_function
HORVU.MOREX.r3.1HG0018590.1		motif_sequence	1489	4	+	organism	short_function
HORVU.MOREX.r3.1HG0018590.1		motif_sequence	1584	4	-	organism	short_function
HORVU.MOREX.r3.1HG0018590.1		motif_sequence	1734	4	-	organism	short_function
HORVU.MOREX.r3.1HG0018590.1		motif_sequence	1775	4	+	organism	short_function
HORVU.MOREX.r3.1HG0018590.1		motif_sequence	1782	4	+	organism	short_function
HORVU.MOREX.r3.1HG0018590.1		motif_sequence	1809	4	+	organism	short_function
HORVU.MOREX.r3.1HG0018590.1		motif_sequence	1867	4	+	organism	short_function
HORVU.MOREX.r3.1HG0018590.1		motif_sequence	1930	4	+	organism	short_function
HORVU.MOREX.r3.1HG0018590.1		motif_sequence	1935	4	+	organism	short_function
HORVU.MOREX.r3.1HG0018590.1		motif_sequence	2002	4	+	organism	short_function
HORVU.MOREX.r3.1HG0018590.1	CCAAT-box	CAACGG	1060	6	+	Hordeum vulgare	MYBHv1 binding site
HORVU.MOREX.r3.1HG0018590.1	CAAT-box	CAAAT	87	5	+	Pisum sativum	common cis-acting element in promoter and enhancer regions
HORVU.MOREX.r3.1HG0018590.1	CAAT-box	CAAT	277	4	-	Nicotiana glutinosa
HORVU.MOREX.r3.1HG0018590.1	CAAT-box	CAAAT	299	5	+	Pisum sativum	common cis-acting element in promoter and enhancer regions
HORVU.MOREX.r3.1HG0018590.1	CAAT-box	CAAT	329	4	+	Nicotiana glutinosa
HORVU.MOREX.r3.1HG0018590.1	CAAT-box	CCAAT	417	5	+	Arabidopsis thaliana	common cis-acting element in promoter and enhancer regions
HORVU.MOREX.r3.1HG0018590.1	CAAT-box	CAAT	418	4	+	Nicotiana glutinosa
HORVU.MOREX.r3.1HG0018590.1	CAAT-box	CAAT	422	4	+	Nicotiana glutinosa
HORVU.MOREX.r3.1HG0018590.1	CAAT-box	CAAT	429	4	+	Nicotiana glutinosa
HORVU.MOREX.r3.1HG0018590.1	CAAT-box	CCAAT	565	5	-	Arabidopsis thaliana	common cis-acting element in promoter and enhancer regions
HORVU.MOREX.r3.1HG0018590.1	CAAT-box	CAAT	587	4	+	Nicotiana glutinosa
HORVU.MOREX.r3.1HG0018590.1	CAAT-box	CCAAT	612	5	-	Arabidopsis thaliana	common cis-acting element in promoter and enhancer regions
HORVU.MOREX.r3.1HG0018590.1	CAAT-box	CAAAT	639	5	-	Pisum sativum	common cis-acting element in promoter and enhancer regions
HORVU.MOREX.r3.1HG0018590.1	CAAT-box	CCCAATTT	676	8	-	Arabidopsis thaliana	common cis-acting element in promoter and enhancer regions
HORVU.MOREX.r3.1HG0018590.1	CAAT-box	CCAAT	678	5	-	Arabidopsis thaliana	common cis-acting element in promoter and enhancer regions
HORVU.MOREX.r3.1HG0018590.1	CAAT-box	CAAT	713	4	+	Nicotiana glutinosa
HORVU.MOREX.r3.1HG0018590.1	CAAT-box	CAAT	733	4	-	Nicotiana glutinosa
HORVU.MOREX.r3.1HG0018590.1	CAAT-box	CAAAT	761	5	+	Pisum sativum	common cis-acting element in promoter and enhancer regions
HORVU.MOREX.r3.1HG0018590.1	CAAT-box	CCAAT	858	5	-	Arabidopsis thaliana	common cis-acting element in promoter and enhancer regions
HORVU.MOREX.r3.1HG0018590.1	CAAT-box	CCAAT	880	5	-	Arabidopsis thaliana	common cis-acting element in promoter and enhancer regions
HORVU.MOREX.r3.1HG0018590.1	CAAT-box	CAAT	887	4	-	Nicotiana glutinosa
HORVU.MOREX.r3.1HG0018590.1	CAAT-box	CAAT	1002	4	-	Nicotiana glutinosa
HORVU.MOREX.r3.1HG0018590.1	CAAT-box	CAAT	1006	4	-	Nicotiana glutinosa
HORVU.MOREX.r3.1HG0018590.1	CAAT-box	CAAT	1076	4	+	Nicotiana glutinosa
HORVU.MOREX.r3.1HG0018590.1	CAAT-box	CAAT	1494	4	+	Nicotiana glutinosa
HORVU.MOREX.r3.1HG0018590.1	CAAT-box	CAAT	1523	4	+	Nicotiana glutinosa
HORVU.MOREX.r3.1HG0018590.1	CAAT-box	CAACCAACTCC	1668	10	+	Arabidopsis thaliana	common cis-acting element in promoter and enhancer regions
HORVU.MOREX.r3.1HG0018590.1	CAAT-box	CAAT	1820	4	+	Nicotiana glutinosa
HORVU.MOREX.r3.1HG0018590.1	CAAT-box	CAAT	1835	4	+	Nicotiana glutinosa
HORVU.MOREX.r3.1HG0018590.1	CAAT-box	CAAT	1942	4	+	Nicotiana glutinosa
HORVU.MOREX.r3.1HG0018590.1	CAAT-box	CAAT	2008	4	-	Nicotiana glutinosa
HORVU.MOREX.r3.1HG0018590.1	ABRE3a	TACGTG	593	6	+	Zea mays
HORVU.MOREX.r3.1HG0018590.1	TCCC-motif	TCTCCCT	929	7	-	Spinacia oleracea	part of a light responsive element
HORVU.MOREX.r3.1HG0018590.1	as-1	TGACG	735	5	+	Arabidopsis thaliana
HORVU.MOREX.r3.1HG0018590.1	as-1	TGACG	1008	5	+	Arabidopsis thaliana
HORVU.MOREX.r3.1HG0018590.1	as-1	TGACG	1249	5	+	Arabidopsis thaliana
HORVU.MOREX.r3.1HG0018590.1	as-1	TGACG	1591	5	+	Arabidopsis thaliana
HORVU.MOREX.r3.1HG0018590.1	CCGTCC-box	CCGTCC	849	6	+	Petroselinum hortense
HORVU.MOREX.r3.1HG0018590.1	GATA-motif	GATAGGA	1778	7	-	Arabidopsis thaliana	part of a light responsive element
HORVU.MOREX.r3.1HG0018590.1	AAGAA-motif	GAAAGAA	191	7	+	Avena sativa
HORVU.MOREX.r3.1HG0018590.1	AAGAA-motif	gGTAAAGAAA	919	9	+	Avena sativa
HORVU.MOREX.r3.1HG0018590.1	TGACG-motif	TGACG	735	5	+	Hordeum vulgare	cis-acting regulatory element involved in the MeJA-responsiveness
HORVU.MOREX.r3.1HG0018590.1	TGACG-motif	TGACG	1008	5	+	Hordeum vulgare	cis-acting regulatory element involved in the MeJA-responsiveness
HORVU.MOREX.r3.1HG0018590.1	TGACG-motif	TGACG	1249	5	+	Hordeum vulgare	cis-acting regulatory element involved in the MeJA-responsiveness
HORVU.MOREX.r3.1HG0018590.1	TGACG-motif	TGACG	1591	5	+	Hordeum vulgare	cis-acting regulatory element involved in the MeJA-responsiveness
HORVU.MOREX.r3.1HG0018590.1	ABRE	ACGTG	594	5	+	Arabidopsis thaliana	cis-acting element involved in the abscisic acid responsiveness
HORVU.MOREX.r3.1HG0018590.1	ABRE	ACGTG	842	5	+	Arabidopsis thaliana	cis-acting element involved in the abscisic acid responsiveness
HORVU.MOREX.r3.1HG0025510.1	as-1	TGACG	950	5	-	Arabidopsis thaliana
HORVU.MOREX.r3.1HG0025510.1	as-1	TGACG	1212	5	-	Arabidopsis thaliana
HORVU.MOREX.r3.1HG0025510.1	as-1	TGACG	1563	5	+	Arabidopsis thaliana
HORVU.MOREX.r3.1HG0025510.1	dOCT	CTCGGATC	1748	8	+	Zea mays
HORVU.MOREX.r3.1HG0025510.1	CTAG-motif	ACTAGCAGAA	1964	10	-	Avena sativa
HORVU.MOREX.r3.1HG0025510.1	CCGTCC-box	CCGTCC	1466	6	-	Petroselinum hortense
HORVU.MOREX.r3.1HG0025510.1	ABRE	AACCCGG	196	7	+	Arabidopsis thaliana	cis-acting element involved in the abscisic acid responsiveness
HORVU.MOREX.r3.1HG0025510.1	ABRE	CACGTG	399	6	+	Arabidopsis thaliana	cis-acting element involved in the abscisic acid responsiveness
HORVU.MOREX.r3.1HG0025510.1	ABRE	ACGTG	400	5	+	Arabidopsis thaliana	cis-acting element involved in the abscisic acid responsiveness
HORVU.MOREX.r3.1HG0025510.1	ABRE	ACGTG	636	5	+	Arabidopsis thaliana	cis-acting element involved in the abscisic acid responsiveness
HORVU.MOREX.r3.1HG0025510.1	ABRE	ACGTG	1565	5	+	Arabidopsis thaliana	cis-acting element involved in the abscisic acid responsiveness
HORVU.MOREX.r3.1HG0025510.1	ABRE	CACGTG	1786	6	-	Arabidopsis thaliana	cis-acting element involved in the abscisic acid responsiveness
HORVU.MOREX.r3.1HG0025510.1	ABRE	ACGTG	1787	5	+	Arabidopsis thaliana	cis-acting element involved in the abscisic acid responsiveness
HORVU.MOREX.r3.1HG0025510.1	ABRE	CACGTG	1830	6	-	Arabidopsis thaliana	cis-acting element involved in the abscisic acid responsiveness
HORVU.MOREX.r3.1HG0025510.1	ABRE	ACGTG	1831	5	+	Arabidopsis thaliana	cis-acting element involved in the abscisic acid responsiveness
HORVU.MOREX.r3.1HG0025510.1	TGACG-motif	TGACG	950	5	-	Hordeum vulgare	cis-acting regulatory element involved in the MeJA-responsiveness
HORVU.MOREX.r3.1HG0025510.1	TGACG-motif	TGACG	1212	5	-	Hordeum vulgare	cis-acting regulatory element involved in the MeJA-responsiveness
HORVU.MOREX.r3.1HG0025510.1	TGACG-motif	TGACG	1563	5	+	Hordeum vulgare	cis-acting regulatory element involved in the MeJA-responsiveness
HORVU.MOREX.r3.1HG0025510.1	G-box	GCCACGTGGA	397	9	+	Arabidopsis thaliana	cis-acting regulatory element involved in light responsiveness
HORVU.MOREX.r3.1HG0025510.1	G-box	CACGTG	399	6	+	Arabidopsis thaliana	cis-acting regulatory element involved in light responsiveness
HORVU.MOREX.r3.1HG0025510.1	G-box	TACGTG	635	6	+	Arabidopsis thaliana	cis-acting regulatory element involved in light responsiveness
HORVU.MOREX.r3.1HG0025510.1	G-box	CACGTC	1564	6	-	Zea mays	cis-acting regulatory element involved in light responsiveness
HORVU.MOREX.r3.1HG0025510.1	G-box	CACGAC	1582	6	-	Zea mays	cis-acting regulatory element involved in light responsiveness
HORVU.MOREX.r3.1HG0025510.1	G-box	CACGTG	1786	6	-	Arabidopsis thaliana	cis-acting regulatory element involved in light responsiveness
HORVU.MOREX.r3.1HG0025510.1	G-box	CACGTG	1830	6	-	Arabidopsis thaliana	cis-acting regulatory element involved in light responsiveness
HORVU.MOREX.r3.1HG0025510.1	WRE3	CCACCT	821	6	+	Pisum sativum
HORVU.MOREX.r3.1HG0025510.1	CGTCA-motif	CGTCA	950	5	+	Hordeum vulgare	cis-acting regulatory element involved in the MeJA-responsiveness
HORVU.MOREX.r3.1HG0025510.1	CGTCA-motif	CGTCA	1212	5	+	Hordeum vulgare	cis-acting regulatory element involved in the MeJA-responsiveness
HORVU.MOREX.r3.1HG0025510.1	CGTCA-motif	CGTCA	1563	5	-	Hordeum vulgare	cis-acting regulatory element involved in the MeJA-responsiveness
HORVU.MOREX.r3.1HG0025510.1	plant_AP-2-like	CGACCAGG	1806	8	-	Oryza sativa	?
HORVU.MOREX.r3.1HG0025510.1	MYB-like sequence	TAACCA	76	6	-	Arabidopsis thaliana
HORVU.MOREX.r3.1HG0025510.1	MYB-like sequence	TAACCA	379	6	-	Arabidopsis thaliana
HORVU.MOREX.r3.1HG0025510.1	MYB-like sequence	TAACCA	1062	6	-	Arabidopsis thaliana
HORVU.MOREX.r3.1HG0025510.1	MYB-like sequence	TAACCA	1542	6	-	Arabidopsis thaliana
HORVU.MOREX.r3.1HG0025510.1	MYB-like sequence	TAACCA	1674	6	-	Arabidopsis thaliana
HORVU.MOREX.r3.1HG0025510.1	TATA-box	TATA	48	4	+	Arabidopsis thaliana	core promoter element around -30 of transcription start
HORVU.MOREX.r3.1HG0025510.1	TATA-box	TATAA	79	5	-	Arabidopsis thaliana	core promoter element around -30 of transcription start
HORVU.MOREX.r3.1HG0025510.1	TATA-box	TATA	80	4	+	Arabidopsis thaliana	core promoter element around -30 of transcription start
HORVU.MOREX.r3.1HG0025510.1	TATA-box	TATA	87	4	+	Arabidopsis thaliana	core promoter element around -30 of transcription start
HORVU.MOREX.r3.1HG0025510.1	TATA-box	TACAAAA	154	7	-	Oryza sativa	core promoter element around -30 of transcription start
HORVU.MOREX.r3.1HG0025510.1	TATA-box	TACAAAA	619	7	-	Oryza sativa	core promoter element around -30 of transcription start
HORVU.MOREX.r3.1HG0025510.1	TATA-box	TATA	709	4	+	Arabidopsis thaliana	core promoter element around -30 of transcription start
HORVU.MOREX.r3.1HG0025510.1	TATA-box	TATA	757	4	+	Arabidopsis thaliana	core promoter element around -30 of transcription start
HORVU.MOREX.r3.1HG0025510.1	TATA-box	TATA	1893	4	-	Arabidopsis thaliana	core promoter element around -30 of transcription start
HORVU.MOREX.r3.1HG0025510.1	ABRE3a	TACGTG	635	6	+	Zea mays
HORVU.MOREX.r3.1HG0025510.1	GARE-motif	TCTGTTG	1609	7	+	Brassica oleracea	gibberellin-responsive element
HORVU.MOREX.r3.1HG0025510.1	CAAT-box	CAAAT	173	5	+	Pisum sativum	common cis-acting element in promoter and enhancer regions
HORVU.MOREX.r3.1HG0025510.1	CAAT-box	CCAAT	374	5	-	Arabidopsis thaliana	common cis-acting element in promoter and enhancer regions
HORVU.MOREX.r3.1HG0025510.1	CAAT-box	CAAT	625	4	-	Nicotiana glutinosa
HORVU.MOREX.r3.1HG0025510.1	CAAT-box	CAAAT	629	5	-	Pisum sativum	common cis-acting element in promoter and enhancer regions
HORVU.MOREX.r3.1HG0025510.1	CAAT-box	CAAT	657	4	-	Nicotiana glutinosa
HORVU.MOREX.r3.1HG0025510.1	CAAT-box	CCAAT	676	5	+	Arabidopsis thaliana	common cis-acting element in promoter and enhancer regions
HORVU.MOREX.r3.1HG0025510.1	CAAT-box	CAAT	677	4	+	Nicotiana glutinosa
HORVU.MOREX.r3.1HG0025510.1	CAAT-box	CAAT	960	4	+	Nicotiana glutinosa
HORVU.MOREX.r3.1HG0025510.1	CAAT-box	CCAAT	1004	5	-	Arabidopsis thaliana	common cis-acting element in promoter and enhancer regions
HORVU.MOREX.r3.1HG0025510.1	CAAT-box	CAAAT	1035	5	-	Pisum sativum	common cis-acting element in promoter and enhancer regions
HORVU.MOREX.r3.1HG0025510.1	CAAT-box	TGCCAAC	1090	7	-	Petunia hybrida	common cis-acting element in promoter and enhancer regions
HORVU.MOREX.r3.1HG0025510.1	CAAT-box	CAAAT	1128	5	-	Pisum sativum	common cis-acting element in promoter and enhancer regions
HORVU.MOREX.r3.1HG0025510.1	CAAT-box	CAAT	1223	4	-	Nicotiana glutinosa
HORVU.MOREX.r3.1HG0025510.1	CAAT-box	CAAT	1358	4	+	Nicotiana glutinosa
HORVU.MOREX.r3.1HG0025510.1	CAAT-box	CAAT	1422	4	+	Nicotiana glutinosa
HORVU.MOREX.r3.1HG0025510.1	CAAT-box	CAAT	1443	4	-	Nicotiana glutinosa
HORVU.MOREX.r3.1HG0025510.1	CAAT-box	CAAT	1450	4	+	Nicotiana glutinosa
HORVU.MOREX.r3.1HG0025510.1	CAAT-box	CAAAT	1513	5	+	Pisum sativum	common cis-acting element in promoter and enhancer regions
HORVU.MOREX.r3.1HG0025510.1	CAAT-box	CCAAT	1628	5	-	Arabidopsis thaliana	common cis-acting element in promoter and enhancer regions
HORVU.MOREX.r3.1HG0025510.1	CAAT-box	CAAT	1780	4	-	Nicotiana glutinosa
HORVU.MOREX.r3.1HG0025510.1		motif_sequence	158	4	-	organism	short_function
HORVU.MOREX.r3.1HG0025510.1		motif_sequence	327	4	+	organism	short_function
HORVU.MOREX.r3.1HG0025510.1		motif_sequence	448	4	+	organism	short_function
HORVU.MOREX.r3.1HG0025510.1		motif_sequence	663	4	-	organism	short_function
HORVU.MOREX.r3.1HG0025510.1		motif_sequence	679	4	+	organism	short_function
HORVU.MOREX.r3.1HG0025510.1		motif_sequence	726	4	+	organism	short_function
HORVU.MOREX.r3.1HG0025510.1		motif_sequence	856	4	-	organism	short_function
HORVU.MOREX.r3.1HG0025510.1		motif_sequence	1198	4	+	organism	short_function
HORVU.MOREX.r3.1HG0025510.1		motif_sequence	1216	4	+	organism	short_function
HORVU.MOREX.r3.1HG0025510.1		motif_sequence	1439	4	-	organism	short_function
HORVU.MOREX.r3.1HG0025510.1		motif_sequence	1502	4	+	organism	short_function
HORVU.MOREX.r3.1HG0025510.1		motif_sequence	1508	4	+	organism	short_function
HORVU.MOREX.r3.1HG0025510.1		motif_sequence	1866	4	+	organism	short_function
HORVU.MOREX.r3.1HG0025510.1	P-box	CCTTTTG	617	7	+	Oryza sativa	gibberellin-responsive element
HORVU.MOREX.r3.1HG0025510.1	STRE	AGGGG	318	5	-	Arabidopsis thaliana
HORVU.MOREX.r3.1HG0025510.1	Unnamed__1	CGTGG	398	5	-	Zea mays
HORVU.MOREX.r3.1HG0025510.1	Unnamed__1	CGTGG	517	5	+	Zea mays
HORVU.MOREX.r3.1HG0025510.1	Unnamed__1	CGTGG	1769	5	-	Zea mays
HORVU.MOREX.r3.1HG0025510.1	Unnamed__1	CGTGG	1838	5	-	Zea mays
HORVU.MOREX.r3.1HG0025510.1	MYB	TAACCA	76	6	-	Arabidopsis thaliana
HORVU.MOREX.r3.1HG0025510.1	MYB	TAACCA	379	6	-	Arabidopsis thaliana
HORVU.MOREX.r3.1HG0025510.1	MYB	TAACCA	1062	6	-	Arabidopsis thaliana
HORVU.MOREX.r3.1HG0025510.1	MYB	CAACCA	1271	6	+	Arabidopsis thaliana
HORVU.MOREX.r3.1HG0025510.1	MYB	TAACCA	1542	6	-	Arabidopsis thaliana
HORVU.MOREX.r3.1HG0025510.1	MYB	CAACAG	1610	6	-	Arabidopsis thaliana
HORVU.MOREX.r3.1HG0025510.1	MYB	CAACCA	1630	6	-	Arabidopsis thaliana
HORVU.MOREX.r3.1HG0025510.1	MYB	TAACCA	1674	6	-	Arabidopsis thaliana
HORVU.MOREX.r3.1HG0025510.1	A-box	CCGTCC	1466	6	-	Petroselinum crispum	cis-acting regulatory element
HORVU.MOREX.r3.1HG0025510.1	CAT-box	GCCACT	385	6	-	Arabidopsis thaliana	cis-acting regulatory element related to meristem expression
HORVU.MOREX.r3.1HG0025510.1	TCA-element	CCATCTTTTT	802	9	-	Nicotiana tabacum	cis-acting element involved in salicylic acid responsiveness
HORVU.MOREX.r3.1HG0025510.1	ABRE4	CACGTA	635	6	-	Zea mays
HORVU.MOREX.r3.1HG0025510.1	ATCT-motif	AATCTAATCC	787	9	+	Pisum sativum	part of a conserved DNA module involved in light responsiveness
HORVU.MOREX.r3.1HG0025510.1	CARE	CAACTCAC	884	8	+	Oryza sativa
HORVU.MOREX.r3.1HG0025510.1	G-Box	CACGTG	399	6	+	Pisum sativum	cis-acting regulatory element involved in light responsiveness
HORVU.MOREX.r3.1HG0025510.1	G-Box	CACGTG	1786	6	-	Pisum sativum	cis-acting regulatory element involved in light responsiveness
HORVU.MOREX.r3.1HG0025510.1	G-Box	CACGTG	1830	6	-	Pisum sativum	cis-acting regulatory element involved in light responsiveness
HORVU.MOREX.r3.1HG0025510.1	circadian	CAAAGATATC	873	9	-	Lycopersicon esculentum	cis-acting regulatory element involved in circadian control
HORVU.MOREX.r3.1HG0025510.1	ARE	AAACCA	230	6	-	Zea mays	cis-acting regulatory element essential for the anaerobic induction
HORVU.MOREX.r3.1HG0025510.1	ARE	AAACCA	781	6	-	Zea mays	cis-acting regulatory element essential for the anaerobic induction
HORVU.MOREX.r3.1HG0025510.1	MYC	CATGTG	447	6	+	Arabidopsis thaliana
HORVU.MOREX.r3.1HG0025510.1	MYC	CATGTG	857	6	-	Arabidopsis thaliana
HORVU.MOREX.r3.1HG0025510.1	MYC	CATTTG	1034	6	+	Arabidopsis thaliana
HORVU.MOREX.r3.1HG0025510.1	MYC	CATTTG	1127	6	+	Arabidopsis thaliana
HORVU.MOREX.r3.1HG0025510.1	MYC	CATTTG	1513	6	-	Arabidopsis thaliana
HORVU.MOREX.r3.1HG0025510.1	Myb-binding site	CAACAG	1610	6	-	Nicotiana tabacum
HORVU.MOREX.r3.1HG0025510.1	GT1-motif	GGTTAA	380	6	+	Arabidopsis thaliana	light responsive element
HORVU.MOREX.r3.1HG0025510.1	Myb	CAACTG	1236	6	+	Arabidopsis thaliana
HORVU.MOREX.r3.1HG0025510.1	AP-1	TGAGTTAG	249	8	+	Arabidopsis thaliana
HORVU.MOREX.r3.1HG0025510.1	CCGTCC motif	CCGTCC	1466	6	-	Nicotiana tabacum
HORVU.MOREX.r3.1HG0025510.1	Unnamed__4	CTCC	241	4	-	Petroselinum hortense
HORVU.MOREX.r3.1HG0025510.1	Unnamed__4	CTCC	262	4	-	Petroselinum hortense
HORVU.MOREX.r3.1HG0025510.1	Unnamed__4	CTCC	276	4	+	Petroselinum hortense
HORVU.MOREX.r3.1HG0025510.1	Unnamed__4	CTCC	454	4	+	Petroselinum hortense
HORVU.MOREX.r3.1HG0025510.1	Unnamed__4	CTCC	584	4	-	Petroselinum hortense
HORVU.MOREX.r3.1HG0025510.1	Unnamed__4	CTCC	615	4	+	Petroselinum hortense
HORVU.MOREX.r3.1HG0025510.1	Unnamed__4	CTCC	681	4	+	Petroselinum hortense
HORVU.MOREX.r3.1HG0025510.1	Unnamed__4	CTCC	908	4	-	Petroselinum hortense
HORVU.MOREX.r3.1HG0025510.1	Unnamed__4	CTCC	911	4	-	Petroselinum hortense
HORVU.MOREX.r3.1HG0025510.1	Unnamed__4	CTCC	1475	4	-	Petroselinum hortense
HORVU.MOREX.r3.1HG0025510.1	Unnamed__4	CTCC	1504	4	+	Petroselinum hortense
HORVU.MOREX.r3.1HG0025510.1	Unnamed__4	CTCC	1527	4	+	Petroselinum hortense
HORVU.MOREX.r3.1HG0025510.1	Unnamed__4	CTCC	1836	4	+	Petroselinum hortense
HORVU.MOREX.r3.1HG0025510.1	Unnamed__4	CTCC	1925	4	+	Petroselinum hortense
HORVU.MOREX.r3.1HG0025510.1	Unnamed__4	CTCC	1950	4	+	Petroselinum hortense
HORVU.MOREX.r3.1HG0025510.1	Unnamed__4	CTCC	1997	4	+	Petroselinum hortense
HORVU.MOREX.r3.1HG0025510.1	MBS	CAACTG	1236	6	+	Arabidopsis thaliana	MYB binding site involved in drought-inducibility
HORVU.MOREX.r3.1HG0025510.1	Sp1	GGGCGG	1229	6	-	Oryza sativa	light responsive element
HORVU.MOREX.r3.1HG0031520.1	STRE	AGGGG	193	5	-	Arabidopsis thaliana
HORVU.MOREX.r3.1HG0031520.1	STRE	AGGGG	429	5	+	Arabidopsis thaliana
HORVU.MOREX.r3.1HG0031520.1	STRE	AGGGG	611	5	+	Arabidopsis thaliana
HORVU.MOREX.r3.1HG0031520.1	LTR	CCGAAA	2001	6	-	Hordeum vulgare	cis-acting element involved in low-temperature responsiveness
HORVU.MOREX.r3.1HG0031520.1	P-box	CCTTTTG	418	7	-	Oryza sativa	gibberellin-responsive element
HORVU.MOREX.r3.1HG0031520.1	P-box	CCTTTTG	1680	7	-	Oryza sativa	gibberellin-responsive element
HORVU.MOREX.r3.1HG0031520.1	WUN-motif	ACATTACGG	680	9	+	Nicotiana glutinosa
HORVU.MOREX.r3.1HG0031520.1	Unnamed__1	CGTGG	1144	5	-	Zea mays
HORVU.MOREX.r3.1HG0031520.1	GCN4_motif	TGAGTCA	1361	7	-	Oryza sativa	cis-regulatory element involved in endosperm expression
HORVU.MOREX.r3.1HG0031520.1	chs-Unit 1 m1	ACCTAACCCGC	1410	10	-	Hordeum vulgare	part of a light responsive element
HORVU.MOREX.r3.1HG0031520.1	MYB	CAACCA	26	6	+	Arabidopsis thaliana
HORVU.MOREX.r3.1HG0031520.1	MYB	CAACCA	696	6	+	Arabidopsis thaliana
HORVU.MOREX.r3.1HG0031520.1	MYB	CAACCA	1203	6	+	Arabidopsis thaliana
HORVU.MOREX.r3.1HG0031520.1	MYB	CAACCA	1207	6	+	Arabidopsis thaliana
HORVU.MOREX.r3.1HG0031520.1	MYB	CAACAG	1427	6	+	Arabidopsis thaliana
HORVU.MOREX.r3.1HG0031520.1	MYB	TAACCA	1598	6	-	Arabidopsis thaliana
HORVU.MOREX.r3.1HG0031520.1	MYB	TAACCA	1798	6	-	Arabidopsis thaliana
HORVU.MOREX.r3.1HG0031520.1	A-box	CCGTCC	1195	6	-	Petroselinum crispum	cis-acting regulatory element
HORVU.MOREX.r3.1HG0031520.1	Myb-binding site	CAACAG	1427	6	+	Nicotiana tabacum
HORVU.MOREX.r3.1HG0031520.1	GT1-motif	GGTTAA	1599	6	+	Arabidopsis thaliana	light responsive element
HORVU.MOREX.r3.1HG0031520.1	MYC	CAATTG	51	6	+	Arabidopsis thaliana
HORVU.MOREX.r3.1HG0031520.1	MYC	CATTTG	344	6	+	Arabidopsis thaliana
HORVU.MOREX.r3.1HG0031520.1	MYC	CAATTG	1366	6	-	Arabidopsis thaliana
HORVU.MOREX.r3.1HG0031520.1	I-box	cCATATCCAAT	135	10	+	Flaveria trinervia	part of a light responsive element
HORVU.MOREX.r3.1HG0031520.1	I-box	GTATAAGGCC	1171	9	-	Larix laricina	part of a light responsive element
HORVU.MOREX.r3.1HG0031520.1	Sp1	GGGCGG	1083	6	-	Oryza sativa	light responsive element
HORVU.MOREX.r3.1HG0031520.1	MBS	CAACTG	1232	6	+	Arabidopsis thaliana	MYB binding site involved in drought-inducibility
HORVU.MOREX.r3.1HG0031520.1	Myb	CAACTG	1232	6	+	Arabidopsis thaliana
HORVU.MOREX.r3.1HG0031520.1	Unnamed__4	CTCC	191	4	+	Petroselinum hortense
HORVU.MOREX.r3.1HG0031520.1	Unnamed__4	CTCC	241	4	-	Petroselinum hortense
HORVU.MOREX.r3.1HG0031520.1	Unnamed__4	CTCC	569	4	-	Petroselinum hortense
HORVU.MOREX.r3.1HG0031520.1	Unnamed__4	CTCC	800	4	+	Petroselinum hortense
HORVU.MOREX.r3.1HG0031520.1	Unnamed__4	CTCC	889	4	+	Petroselinum hortense
HORVU.MOREX.r3.1HG0031520.1	Unnamed__4	CTCC	904	4	+	Petroselinum hortense
HORVU.MOREX.r3.1HG0031520.1	Unnamed__4	CTCC	1069	4	+	Petroselinum hortense
HORVU.MOREX.r3.1HG0031520.1	Unnamed__4	CTCC	1192	4	-	Petroselinum hortense
HORVU.MOREX.r3.1HG0031520.1	Unnamed__4	CTCC	1267	4	+	Petroselinum hortense
HORVU.MOREX.r3.1HG0031520.1	Unnamed__4	CTCC	1371	4	-	Petroselinum hortense
HORVU.MOREX.r3.1HG0031520.1	Unnamed__4	CTCC	1436	4	+	Petroselinum hortense
HORVU.MOREX.r3.1HG0031520.1	Unnamed__4	CTCC	1577	4	-	Petroselinum hortense
HORVU.MOREX.r3.1HG0031520.1	Unnamed__4	CTCC	1666	4	-	Petroselinum hortense
HORVU.MOREX.r3.1HG0031520.1	Unnamed__4	CTCC	1757	4	-	Petroselinum hortense
HORVU.MOREX.r3.1HG0031520.1	Unnamed__4	CTCC	1776	4	+	Petroselinum hortense
HORVU.MOREX.r3.1HG0031520.1	Unnamed__4	CTCC	1900	4	+	Petroselinum hortense
HORVU.MOREX.r3.1HG0031520.1	Unnamed__4	CTCC	1917	4	+	Petroselinum hortense
HORVU.MOREX.r3.1HG0031520.1	CCGTCC motif	CCGTCC	1195	6	-	Nicotiana tabacum
HORVU.MOREX.r3.1HG0031520.1	OCT	CGCGGATC	975	8	-	Zea mays
HORVU.MOREX.r3.1HG0031520.1	as-1	TGACG	932	5	-	Arabidopsis thaliana
HORVU.MOREX.r3.1HG0031520.1	as-1	TGACG	1447	5	+	Arabidopsis thaliana
HORVU.MOREX.r3.1HG0031520.1	F-box	CTATTCTCATT	1895	10	+	Lycopersicon esculentum
HORVU.MOREX.r3.1HG0031520.1	GC-motif	CCCCCG	938	6	+	Zea mays	enhancer-like element involved in anoxic specific inducibility
HORVU.MOREX.r3.1HG0031520.1	GC-motif	CCCCCG	1247	6	+	Zea mays	enhancer-like element involved in anoxic specific inducibility
HORVU.MOREX.r3.1HG0031520.1	TGACG-motif	TGACG	932	5	-	Hordeum vulgare	cis-acting regulatory element involved in the MeJA-responsiveness
HORVU.MOREX.r3.1HG0031520.1	TGACG-motif	TGACG	1447	5	+	Hordeum vulgare	cis-acting regulatory element involved in the MeJA-responsiveness
HORVU.MOREX.r3.1HG0031520.1	AAGAA-motif	gGTAAAGAAA	1870	9	-	Avena sativa
HORVU.MOREX.r3.1HG0031520.1	DRE core	GCCGAC	1554	6	+	Arabidopsis thaliana
HORVU.MOREX.r3.1HG0031520.1	CCGTCC-box	CCGTCC	1195	6	-	Petroselinum hortense
HORVU.MOREX.r3.1HG0031520.1	TCT-motif	TCTTAC	554	6	+	Arabidopsis thaliana	part of a light responsive element
HORVU.MOREX.r3.1HG0031520.1	CGTCA-motif	CGTCA	932	5	+	Hordeum vulgare	cis-acting regulatory element involved in the MeJA-responsiveness
HORVU.MOREX.r3.1HG0031520.1	CGTCA-motif	CGTCA	1447	5	-	Hordeum vulgare	cis-acting regulatory element involved in the MeJA-responsiveness
HORVU.MOREX.r3.1HG0031520.1	TATA-box	TATA	201	4	+	Arabidopsis thaliana	core promoter element around -30 of transcription start
HORVU.MOREX.r3.1HG0031520.1	TATA-box	TATACA	267	6	-	Helianthus annuus	core promoter element around -30 of transcription start
HORVU.MOREX.r3.1HG0031520.1	TATA-box	TATA	269	4	+	Arabidopsis thaliana	core promoter element around -30 of transcription start
HORVU.MOREX.r3.1HG0031520.1	TATA-box	TACAAAA	416	7	+	Oryza sativa	core promoter element around -30 of transcription start
HORVU.MOREX.r3.1HG0031520.1	TATA-box	ATATAT	617	6	+	Brassica napus	core promoter element around -30 of transcription start
HORVU.MOREX.r3.1HG0031520.1	TATA-box	TATA	618	4	+	Arabidopsis thaliana	core promoter element around -30 of transcription start
HORVU.MOREX.r3.1HG0031520.1	TATA-box	TATAA	1175	5	-	Arabidopsis thaliana	core promoter element around -30 of transcription start
HORVU.MOREX.r3.1HG0031520.1	TATA-box	TATA	1176	4	-	Arabidopsis thaliana	core promoter element around -30 of transcription start
HORVU.MOREX.r3.1HG0031520.1	TATA-box	TATA	1499	4	-	Arabidopsis thaliana	core promoter element around -30 of transcription start
HORVU.MOREX.r3.1HG0031520.1	TATA-box	TATA	1528	4	-	Arabidopsis thaliana	core promoter element around -30 of transcription start
HORVU.MOREX.r3.1HG0031520.1	TATA-box	TATAA	1607	5	-	Arabidopsis thaliana	core promoter element around -30 of transcription start
HORVU.MOREX.r3.1HG0031520.1	TATA-box	TATA	1608	4	-	Arabidopsis thaliana	core promoter element around -30 of transcription start
HORVU.MOREX.r3.1HG0031520.1	TATA-box	ATTATA	1946	6	+	Brassica napus	core promoter element around -30 of transcription start
HORVU.MOREX.r3.1HG0031520.1	TATA-box	TATAA	1947	5	-	Arabidopsis thaliana	core promoter element around -30 of transcription start
HORVU.MOREX.r3.1HG0031520.1	TATA-box	TATA	1948	4	-	Arabidopsis thaliana	core promoter element around -30 of transcription start
HORVU.MOREX.r3.1HG0031520.1	MYB-like sequence	TAACCA	1598	6	-	Arabidopsis thaliana
HORVU.MOREX.r3.1HG0031520.1	MYB-like sequence	TAACCA	1798	6	-	Arabidopsis thaliana
HORVU.MOREX.r3.1HG0031520.1	WRE3	CCACCT	771	6	+	Pisum sativum
HORVU.MOREX.r3.1HG0031520.1	WRE3	CCACCT	860	6	+	Pisum sativum
HORVU.MOREX.r3.1HG0031520.1	CAAT-box	CCAAT	50	5	+	Arabidopsis thaliana	common cis-acting element in promoter and enhancer regions
HORVU.MOREX.r3.1HG0031520.1	CAAT-box	CAAT	51	4	+	Nicotiana glutinosa
HORVU.MOREX.r3.1HG0031520.1	CAAT-box	CAAT	53	4	-	Nicotiana glutinosa
HORVU.MOREX.r3.1HG0031520.1	CAAT-box	CAAT	92	4	-	Nicotiana glutinosa
HORVU.MOREX.r3.1HG0031520.1	CAAT-box	CAAT	118	4	-	Nicotiana glutinosa
HORVU.MOREX.r3.1HG0031520.1	CAAT-box	CCAAT	141	5	+	Arabidopsis thaliana	common cis-acting element in promoter and enhancer regions
HORVU.MOREX.r3.1HG0031520.1	CAAT-box	CAAT	142	4	+	Nicotiana glutinosa
HORVU.MOREX.r3.1HG0031520.1	CAAT-box	CAAT	207	4	-	Nicotiana glutinosa
HORVU.MOREX.r3.1HG0031520.1	CAAT-box	CAAT	223	4	+	Nicotiana glutinosa
HORVU.MOREX.r3.1HG0031520.1	CAAT-box	CAAT	236	4	+	Nicotiana glutinosa
HORVU.MOREX.r3.1HG0031520.1	CAAT-box	CAAT	280	4	+	Nicotiana glutinosa
HORVU.MOREX.r3.1HG0031520.1	CAAT-box	CAAT	300	4	+	Nicotiana glutinosa
HORVU.MOREX.r3.1HG0031520.1	CAAT-box	CAAT	314	4	+	Nicotiana glutinosa
HORVU.MOREX.r3.1HG0031520.1	CAAT-box	CAAAT	345	5	-	Pisum sativum	common cis-acting element in promoter and enhancer regions
HORVU.MOREX.r3.1HG0031520.1	CAAT-box	CCAAT	361	5	-	Arabidopsis thaliana	common cis-acting element in promoter and enhancer regions
HORVU.MOREX.r3.1HG0031520.1	CAAT-box	CAAT	405	4	+	Nicotiana glutinosa
HORVU.MOREX.r3.1HG0031520.1	CAAT-box	CAAAT	476	5	-	Pisum sativum	common cis-acting element in promoter and enhancer regions
HORVU.MOREX.r3.1HG0031520.1	CAAT-box	CAAT	542	4	+	Nicotiana glutinosa
HORVU.MOREX.r3.1HG0031520.1	CAAT-box	CAAT	546	4	-	Nicotiana glutinosa
HORVU.MOREX.r3.1HG0031520.1	CAAT-box	CAAT	559	4	+	Nicotiana glutinosa
HORVU.MOREX.r3.1HG0031520.1	CAAT-box	CAAT	584	4	+	Nicotiana glutinosa
HORVU.MOREX.r3.1HG0031520.1	CAAT-box	CCAAT	639	5	+	Arabidopsis thaliana	common cis-acting element in promoter and enhancer regions
HORVU.MOREX.r3.1HG0031520.1	CAAT-box	CAAT	640	4	+	Nicotiana glutinosa
HORVU.MOREX.r3.1HG0031520.1	CAAT-box	CAAT	667	4	+	Nicotiana glutinosa
HORVU.MOREX.r3.1HG0031520.1	CAAT-box	CAAT	743	4	+	Nicotiana glutinosa
HORVU.MOREX.r3.1HG0031520.1	CAAT-box	CAAT	832	4	+	Nicotiana glutinosa
HORVU.MOREX.r3.1HG0031520.1	CAAT-box	CAAT	992	4	+	Nicotiana glutinosa
HORVU.MOREX.r3.1HG0031520.1	CAAT-box	CAAT	1027	4	+	Nicotiana glutinosa
HORVU.MOREX.r3.1HG0031520.1	CAAT-box	CAAT	1079	4	-	Nicotiana glutinosa
HORVU.MOREX.r3.1HG0031520.1	CAAT-box	CAAAT	1288	5	-	Pisum sativum	common cis-acting element in promoter and enhancer regions
HORVU.MOREX.r3.1HG0031520.1	CAAT-box	CAAT	1348	4	-	Nicotiana glutinosa
HORVU.MOREX.r3.1HG0031520.1	CAAT-box	CAAT	1366	4	+	Nicotiana glutinosa
HORVU.MOREX.r3.1HG0031520.1	CAAT-box	CCAAT	1368	5	-	Arabidopsis thaliana	common cis-acting element in promoter and enhancer regions
HORVU.MOREX.r3.1HG0031520.1	CAAT-box	CCAAT	1396	5	-	Arabidopsis thaliana	common cis-acting element in promoter and enhancer regions
HORVU.MOREX.r3.1HG0031520.1	CAAT-box	CAAAT	1406	5	-	Pisum sativum	common cis-acting element in promoter and enhancer regions
HORVU.MOREX.r3.1HG0031520.1	CAAT-box	CAAAT	1569	5	+	Pisum sativum	common cis-acting element in promoter and enhancer regions
HORVU.MOREX.r3.1HG0031520.1	CAAT-box	CCCAATTT	1570	8	-	Arabidopsis thaliana	common cis-acting element in promoter and enhancer regions
HORVU.MOREX.r3.1HG0031520.1	CAAT-box	CCAAT	1572	5	-	Arabidopsis thaliana	common cis-acting element in promoter and enhancer regions
HORVU.MOREX.r3.1HG0031520.1	CAAT-box	CCAAT	1615	5	-	Arabidopsis thaliana	common cis-acting element in promoter and enhancer regions
HORVU.MOREX.r3.1HG0031520.1	CAAT-box	CAAT	1634	4	-	Nicotiana glutinosa
HORVU.MOREX.r3.1HG0031520.1	CAAT-box	CAAT	1746	4	+	Nicotiana glutinosa
HORVU.MOREX.r3.1HG0031520.1	CAAT-box	CAAT	1810	4	-	Nicotiana glutinosa
HORVU.MOREX.r3.1HG0031520.1	CAAT-box	CAAT	1839	4	+	Nicotiana glutinosa
HORVU.MOREX.r3.1HG0031520.1	CAAT-box	CAAT	1994	4	-	Nicotiana glutinosa
HORVU.MOREX.r3.1HG0031520.1		motif_sequence	45	4	+	organism	short_function
HORVU.MOREX.r3.1HG0031520.1		motif_sequence	316	4	+	organism	short_function
HORVU.MOREX.r3.1HG0031520.1		motif_sequence	482	4	+	organism	short_function
HORVU.MOREX.r3.1HG0031520.1		motif_sequence	549	4	-	organism	short_function
HORVU.MOREX.r3.1HG0031520.1		motif_sequence	569	4	-	organism	short_function
HORVU.MOREX.r3.1HG0031520.1		motif_sequence	589	4	+	organism	short_function
HORVU.MOREX.r3.1HG0031520.1		motif_sequence	654	4	+	organism	short_function
HORVU.MOREX.r3.1HG0031520.1		motif_sequence	798	4	+	organism	short_function
HORVU.MOREX.r3.1HG0031520.1		motif_sequence	887	4	+	organism	short_function
HORVU.MOREX.r3.1HG0031520.1		motif_sequence	913	4	-	organism	short_function
HORVU.MOREX.r3.1HG0031520.1		motif_sequence	972	4	-	organism	short_function
HORVU.MOREX.r3.1HG0031520.1		motif_sequence	1064	4	+	organism	short_function
HORVU.MOREX.r3.1HG0031520.1		motif_sequence	1253	4	+	organism	short_function
HORVU.MOREX.r3.1HG0031520.1		motif_sequence	1378	4	+	organism	short_function
HORVU.MOREX.r3.1HG0031520.1		motif_sequence	1564	4	+	organism	short_function
HORVU.MOREX.r3.1HG0031520.1		motif_sequence	1618	4	-	organism	short_function
HORVU.MOREX.r3.1HG0031520.1		motif_sequence	1757	4	-	organism	short_function
HORVU.MOREX.r3.1HG0043220.1	TGA-element	AACGAC	335	6	+	Brassica oleracea	auxin-responsive element
HORVU.MOREX.r3.1HG0043220.1	CAAT-box	CAAT	176	4	-	Nicotiana glutinosa
HORVU.MOREX.r3.1HG0043220.1	CAAT-box	CAAT	184	4	-	Nicotiana glutinosa
HORVU.MOREX.r3.1HG0043220.1	CAAT-box	CAAAT	268	5	-	Pisum sativum	common cis-acting element in promoter and enhancer regions
HORVU.MOREX.r3.1HG0043220.1	CAAT-box	TGCCAAC	322	7	-	Petunia hybrida	common cis-acting element in promoter and enhancer regions
HORVU.MOREX.r3.1HG0043220.1	CAAT-box	CAAAT	696	5	-	Pisum sativum	common cis-acting element in promoter and enhancer regions
HORVU.MOREX.r3.1HG0043220.1	CAAT-box	CAAAT	732	5	-	Pisum sativum	common cis-acting element in promoter and enhancer regions
HORVU.MOREX.r3.1HG0043220.1	CAAT-box	CCAAT	763	5	-	Arabidopsis thaliana	common cis-acting element in promoter and enhancer regions
HORVU.MOREX.r3.1HG0043220.1	CAAT-box	CAAT	940	4	+	Nicotiana glutinosa
HORVU.MOREX.r3.1HG0043220.1	CAAT-box	CCAAT	955	5	-	Arabidopsis thaliana	common cis-acting element in promoter and enhancer regions
HORVU.MOREX.r3.1HG0043220.1	CAAT-box	CAAT	1042	4	+	Nicotiana glutinosa
HORVU.MOREX.r3.1HG0043220.1	CAAT-box	CAAAT	1080	5	+	Pisum sativum	common cis-acting element in promoter and enhancer regions
HORVU.MOREX.r3.1HG0043220.1	CAAT-box	CAAT	1099	4	+	Nicotiana glutinosa
HORVU.MOREX.r3.1HG0043220.1	CAAT-box	CAAAT	1110	5	+	Pisum sativum	common cis-acting element in promoter and enhancer regions
HORVU.MOREX.r3.1HG0043220.1	CAAT-box	CAAAT	1167	5	-	Pisum sativum	common cis-acting element in promoter and enhancer regions
HORVU.MOREX.r3.1HG0043220.1	CAAT-box	CAAT	1305	4	+	Nicotiana glutinosa
HORVU.MOREX.r3.1HG0043220.1	CAAT-box	CAAAT	1342	5	-	Pisum sativum	common cis-acting element in promoter and enhancer regions
HORVU.MOREX.r3.1HG0043220.1	CAAT-box	CAAT	1392	4	+	Nicotiana glutinosa
HORVU.MOREX.r3.1HG0043220.1	CAAT-box	CAAT	1470	4	-	Nicotiana glutinosa
HORVU.MOREX.r3.1HG0043220.1	CAAT-box	CAAT	1482	4	-	Nicotiana glutinosa
HORVU.MOREX.r3.1HG0043220.1	CAAT-box	CCAAT	1500	5	+	Arabidopsis thaliana	common cis-acting element in promoter and enhancer regions
HORVU.MOREX.r3.1HG0043220.1	CAAT-box	CAAT	1501	4	+	Nicotiana glutinosa
HORVU.MOREX.r3.1HG0043220.1	CAAT-box	CAAT	1515	4	+	Nicotiana glutinosa
HORVU.MOREX.r3.1HG0043220.1	CAAT-box	CAAT	1535	4	+	Nicotiana glutinosa
HORVU.MOREX.r3.1HG0043220.1	CAAT-box	CCAAT	1575	5	-	Arabidopsis thaliana	common cis-acting element in promoter and enhancer regions
HORVU.MOREX.r3.1HG0043220.1	CAAT-box	CAAT	1587	4	-	Nicotiana glutinosa
HORVU.MOREX.r3.1HG0043220.1	CAAT-box	CAAT	1606	4	+	Nicotiana glutinosa
HORVU.MOREX.r3.1HG0043220.1	CAAT-box	CAAT	1620	4	+	Nicotiana glutinosa
HORVU.MOREX.r3.1HG0043220.1	CAAT-box	CAAT	1693	4	+	Nicotiana glutinosa
HORVU.MOREX.r3.1HG0043220.1	CAAT-box	CAAAT	1742	5	+	Pisum sativum	common cis-acting element in promoter and enhancer regions
HORVU.MOREX.r3.1HG0043220.1	GARE-motif	TCTGTTG	1650	7	-	Brassica oleracea	gibberellin-responsive element
HORVU.MOREX.r3.1HG0043220.1	CCAAT-box	CAACGG	441	6	+	Hordeum vulgare	MYBHv1 binding site
HORVU.MOREX.r3.1HG0043220.1		motif_sequence	222	4	-	organism	short_function
HORVU.MOREX.r3.1HG0043220.1		motif_sequence	380	4	-	organism	short_function
HORVU.MOREX.r3.1HG0043220.1		motif_sequence	584	4	-	organism	short_function
HORVU.MOREX.r3.1HG0043220.1		motif_sequence	630	4	-	organism	short_function
HORVU.MOREX.r3.1HG0043220.1		motif_sequence	688	4	-	organism	short_function
HORVU.MOREX.r3.1HG0043220.1		motif_sequence	851	4	-	organism	short_function
HORVU.MOREX.r3.1HG0043220.1		motif_sequence	902	4	+	organism	short_function
HORVU.MOREX.r3.1HG0043220.1		motif_sequence	975	4	-	organism	short_function
HORVU.MOREX.r3.1HG0043220.1		motif_sequence	1073	4	+	organism	short_function
HORVU.MOREX.r3.1HG0043220.1		motif_sequence	1115	4	-	organism	short_function
HORVU.MOREX.r3.1HG0043220.1		motif_sequence	1275	4	+	organism	short_function
HORVU.MOREX.r3.1HG0043220.1		motif_sequence	1322	4	+	organism	short_function
HORVU.MOREX.r3.1HG0043220.1		motif_sequence	1415	4	+	organism	short_function
HORVU.MOREX.r3.1HG0043220.1		motif_sequence	1460	4	-	organism	short_function
HORVU.MOREX.r3.1HG0043220.1		motif_sequence	1820	4	-	organism	short_function
HORVU.MOREX.r3.1HG0043220.1		motif_sequence	1849	4	+	organism	short_function
HORVU.MOREX.r3.1HG0043220.1		motif_sequence	1993	4	-	organism	short_function
HORVU.MOREX.r3.1HG0043220.1	CGTCA-motif	CGTCA	395	5	-	Hordeum vulgare	cis-acting regulatory element involved in the MeJA-responsiveness
HORVU.MOREX.r3.1HG0043220.1	CGTCA-motif	CGTCA	1348	5	-	Hordeum vulgare	cis-acting regulatory element involved in the MeJA-responsiveness
HORVU.MOREX.r3.1HG0043220.1	CGTCA-motif	CGTCA	1389	5	+	Hordeum vulgare	cis-acting regulatory element involved in the MeJA-responsiveness
HORVU.MOREX.r3.1HG0043220.1	CGTCA-motif	CGTCA	1456	5	-	Hordeum vulgare	cis-acting regulatory element involved in the MeJA-responsiveness
HORVU.MOREX.r3.1HG0043220.1	CGTCA-motif	CGTCA	1562	5	-	Hordeum vulgare	cis-acting regulatory element involved in the MeJA-responsiveness
HORVU.MOREX.r3.1HG0043220.1	MYB-like sequence	TAACCA	655	6	-	Arabidopsis thaliana
HORVU.MOREX.r3.1HG0043220.1	TATA-box	ATTATA	206	6	+	Brassica napus	core promoter element around -30 of transcription start
HORVU.MOREX.r3.1HG0043220.1	TATA-box	TATAA	207	5	-	Arabidopsis thaliana	core promoter element around -30 of transcription start
HORVU.MOREX.r3.1HG0043220.1	TATA-box	TATA	208	4	+	Arabidopsis thaliana	core promoter element around -30 of transcription start
HORVU.MOREX.r3.1HG0043220.1	TATA-box	ATATAT	692	6	+	Brassica napus	core promoter element around -30 of transcription start
HORVU.MOREX.r3.1HG0043220.1	TATA-box	TATA	693	4	+	Arabidopsis thaliana	core promoter element around -30 of transcription start
HORVU.MOREX.r3.1HG0043220.1	TATA-box	TATA	715	4	+	Arabidopsis thaliana	core promoter element around -30 of transcription start
HORVU.MOREX.r3.1HG0043220.1	TATA-box	ATATAA	1083	6	+	Brassica oleracea	core promoter element around -30 of transcription start
HORVU.MOREX.r3.1HG0043220.1	TATA-box	TATA	1084	4	-	Arabidopsis thaliana	core promoter element around -30 of transcription start
HORVU.MOREX.r3.1HG0043220.1	TATA-box	TATA	1151	4	-	Arabidopsis thaliana	core promoter element around -30 of transcription start
HORVU.MOREX.r3.1HG0043220.1	TATA-box	TATA	1157	4	-	Arabidopsis thaliana	core promoter element around -30 of transcription start
HORVU.MOREX.r3.1HG0043220.1	TATA-box	TATACA	1241	6	-	Helianthus annuus	core promoter element around -30 of transcription start
HORVU.MOREX.r3.1HG0043220.1	TATA-box	TATA	1243	4	-	Arabidopsis thaliana	core promoter element around -30 of transcription start
HORVU.MOREX.r3.1HG0043220.1	TATA-box	TATA	1318	4	-	Arabidopsis thaliana	core promoter element around -30 of transcription start
HORVU.MOREX.r3.1HG0043220.1	TATA-box	TATA	1792	4	-	Arabidopsis thaliana	core promoter element around -30 of transcription start
HORVU.MOREX.r3.1HG0043220.1	TATA-box	TATA	1920	4	-	Arabidopsis thaliana	core promoter element around -30 of transcription start
HORVU.MOREX.r3.1HG0043220.1	G-box	CACGTC	665	6	+	Zea mays	cis-acting regulatory element involved in light responsiveness
HORVU.MOREX.r3.1HG0043220.1	G-box	CACGAC	1133	6	+	Zea mays	cis-acting regulatory element involved in light responsiveness
HORVU.MOREX.r3.1HG0043220.1	ABRE	ACGTG	665	5	-	Arabidopsis thaliana	cis-acting element involved in the abscisic acid responsiveness
HORVU.MOREX.r3.1HG0043220.1	ABRE	ACGTG	1864	5	-	Arabidopsis thaliana	cis-acting element involved in the abscisic acid responsiveness
HORVU.MOREX.r3.1HG0043220.1	ABRE	ACGTG	1873	5	-	Arabidopsis thaliana	cis-acting element involved in the abscisic acid responsiveness
HORVU.MOREX.r3.1HG0043220.1	TGACG-motif	TGACG	395	5	+	Hordeum vulgare	cis-acting regulatory element involved in the MeJA-responsiveness
HORVU.MOREX.r3.1HG0043220.1	TGACG-motif	TGACG	1348	5	+	Hordeum vulgare	cis-acting regulatory element involved in the MeJA-responsiveness
HORVU.MOREX.r3.1HG0043220.1	TGACG-motif	TGACG	1389	5	-	Hordeum vulgare	cis-acting regulatory element involved in the MeJA-responsiveness
HORVU.MOREX.r3.1HG0043220.1	TGACG-motif	TGACG	1456	5	+	Hordeum vulgare	cis-acting regulatory element involved in the MeJA-responsiveness
HORVU.MOREX.r3.1HG0043220.1	TGACG-motif	TGACG	1562	5	+	Hordeum vulgare	cis-acting regulatory element involved in the MeJA-responsiveness
HORVU.MOREX.r3.1HG0043220.1	DRE core	GCCGAC	1972	6	-	Arabidopsis thaliana
HORVU.MOREX.r3.1HG0043220.1	CCGTCC-box	CCGTCC	1625	6	-	Petroselinum hortense
HORVU.MOREX.r3.1HG0043220.1	as-1	TGACG	395	5	+	Arabidopsis thaliana
HORVU.MOREX.r3.1HG0043220.1	as-1	TGACG	1348	5	+	Arabidopsis thaliana
HORVU.MOREX.r3.1HG0043220.1	as-1	TGACG	1389	5	-	Arabidopsis thaliana
HORVU.MOREX.r3.1HG0043220.1	as-1	TGACG	1456	5	+	Arabidopsis thaliana
HORVU.MOREX.r3.1HG0043220.1	as-1	TGACG	1562	5	+	Arabidopsis thaliana
HORVU.MOREX.r3.1HG0043220.1	RY-element	CATGCATG	189	8	+	Helianthus annuus	cis-acting regulatory element involved in seed-specific regulation
HORVU.MOREX.r3.1HG0043220.1	GC-motif	CCCCCG	1896	6	+	Zea mays	enhancer-like element involved in anoxic specific inducibility
HORVU.MOREX.r3.1HG0043220.1	box S	AGCCACC	429	7	-	Arabidopsis thaliana
HORVU.MOREX.r3.1HG0043220.1	Box 4	ATTAAT	1725	6	-	Petroselinum crispum	part of a conserved DNA module involved in light responsiveness
HORVU.MOREX.r3.1HG0043220.1	O2-site	GATGACATGG	158	9	-	Zea mays	cis-acting regulatory element involved in zein metabolism regulation
HORVU.MOREX.r3.1HG0043220.1	O2-site	GATGACATGG	854	9	+	Zea mays	cis-acting regulatory element involved in zein metabolism regulation
HORVU.MOREX.r3.1HG0043220.1	Sp1	GGGCGG	1936	6	-	Oryza sativa	light responsive element
HORVU.MOREX.r3.1HG0043220.1	MBS	CAACTG	529	6	+	Arabidopsis thaliana	MYB binding site involved in drought-inducibility
HORVU.MOREX.r3.1HG0043220.1	MBS	CAACTG	833	6	+	Arabidopsis thaliana	MYB binding site involved in drought-inducibility
HORVU.MOREX.r3.1HG0043220.1	Myb	CAACTG	529	6	+	Arabidopsis thaliana
HORVU.MOREX.r3.1HG0043220.1	Myb	CAACTG	833	6	+	Arabidopsis thaliana
HORVU.MOREX.r3.1HG0043220.1	CCGTCC motif	CCGTCC	1625	6	-	Nicotiana tabacum
HORVU.MOREX.r3.1HG0043220.1	Unnamed__4	CTCC	212	4	+	Petroselinum hortense
HORVU.MOREX.r3.1HG0043220.1	Unnamed__4	CTCC	388	4	-	Petroselinum hortense
HORVU.MOREX.r3.1HG0043220.1	Unnamed__4	CTCC	523	4	-	Petroselinum hortense
HORVU.MOREX.r3.1HG0043220.1	Unnamed__4	CTCC	573	4	+	Petroselinum hortense
HORVU.MOREX.r3.1HG0043220.1	Unnamed__4	CTCC	969	4	+	Petroselinum hortense
HORVU.MOREX.r3.1HG0043220.1	Unnamed__4	CTCC	1003	4	+	Petroselinum hortense
HORVU.MOREX.r3.1HG0043220.1	Unnamed__4	CTCC	1061	4	-	Petroselinum hortense
HORVU.MOREX.r3.1HG0043220.1	Unnamed__4	CTCC	1162	4	-	Petroselinum hortense
HORVU.MOREX.r3.1HG0043220.1	Unnamed__4	CTCC	1232	4	+	Petroselinum hortense
HORVU.MOREX.r3.1HG0043220.1	Unnamed__4	CTCC	1324	4	+	Petroselinum hortense
HORVU.MOREX.r3.1HG0043220.1	Unnamed__4	CTCC	1417	4	+	Petroselinum hortense
HORVU.MOREX.r3.1HG0043220.1	Unnamed__4	CTCC	1945	4	+	Petroselinum hortense
HORVU.MOREX.r3.1HG0043220.1	Unnamed__4	CTCC	1990	4	-	Petroselinum hortense
HORVU.MOREX.r3.1HG0043220.1	Unnamed__4	CTCC	1993	4	-	Petroselinum hortense
HORVU.MOREX.r3.1HG0043220.1	ACE	CTAACGTATT	1100	9	-	Petroselinum crispum	cis-acting element involved in light responsiveness
HORVU.MOREX.r3.1HG0043220.1	GT1-motif	GGTTAAT	649	7	+	Avena sativa	light responsive element
HORVU.MOREX.r3.1HG0043220.1	Myb-binding site	CAACAG	1283	6	-	Nicotiana tabacum
HORVU.MOREX.r3.1HG0043220.1	Myb-binding site	CAACAG	1650	6	+	Nicotiana tabacum
HORVU.MOREX.r3.1HG0043220.1	MYC	CATTTG	731	6	+	Arabidopsis thaliana
HORVU.MOREX.r3.1HG0043220.1	MYC	CATTTG	1110	6	-	Arabidopsis thaliana
HORVU.MOREX.r3.1HG0043220.1	MYC	CATTTG	1166	6	+	Arabidopsis thaliana
HORVU.MOREX.r3.1HG0043220.1	MYC	CATTTG	1742	6	-	Arabidopsis thaliana
HORVU.MOREX.r3.1HG0043220.1	TATC-box	TATCCCA	996	7	+	Oryza sativa	cis-acting element involved in gibberellin-responsiveness
HORVU.MOREX.r3.1HG0043220.1	MYB recognition site	CCGTTG	441	6	-	Arabidopsis thaliana
HORVU.MOREX.r3.1HG0043220.1	circadian	CAAAGATATC	691	9	-	Lycopersicon esculentum	cis-acting regulatory element involved in circadian control
HORVU.MOREX.r3.1HG0043220.1	ARE	AAACCA	1217	6	+	Zea mays	cis-acting regulatory element essential for the anaerobic induction
HORVU.MOREX.r3.1HG0043220.1	ARE	AAACCA	1527	6	+	Zea mays	cis-acting regulatory element essential for the anaerobic induction
HORVU.MOREX.r3.1HG0043220.1	ARE	AAACCA	2003	6	-	Zea mays	cis-acting regulatory element essential for the anaerobic induction
HORVU.MOREX.r3.1HG0043220.1	TCA-element	CCATCTTTTT	786	9	+	Nicotiana tabacum	cis-acting element involved in salicylic acid responsiveness
HORVU.MOREX.r3.1HG0043220.1	G-Box	CACGTT	1864	6	+	Pisum sativum	cis-acting regulatory element involved in light responsiveness
HORVU.MOREX.r3.1HG0043220.1	G-Box	CACGTT	1873	6	+	Pisum sativum	cis-acting regulatory element involved in light responsiveness
HORVU.MOREX.r3.1HG0043220.1	MYB	TAACCA	655	6	-	Arabidopsis thaliana
HORVU.MOREX.r3.1HG0043220.1	MYB	CAACAG	1283	6	-	Arabidopsis thaliana
HORVU.MOREX.r3.1HG0043220.1	MYB	CAACAG	1650	6	+	Arabidopsis thaliana
HORVU.MOREX.r3.1HG0043220.1	MYB	CAACCA	1734	6	+	Arabidopsis thaliana
HORVU.MOREX.r3.1HG0043220.1	A-box	CCGTCC	1625	6	-	Petroselinum crispum	cis-acting regulatory element
HORVU.MOREX.r3.1HG0043220.1	STRE	AGGGG	1758	5	-	Arabidopsis thaliana
HORVU.MOREX.r3.1HG0043220.1	W box	TTGACC	401	6	+	Arabidopsis thaliana
HORVU.MOREX.r3.1HG0043220.1	W box	TTGACC	782	6	+	Arabidopsis thaliana
HORVU.MOREX.r3.1HG0043220.1	W box	TTGACC	830	6	-	Arabidopsis thaliana
HORVU.MOREX.r3.1HG0043220.1	W box	TTGACC	1603	6	-	Arabidopsis thaliana
HORVU.MOREX.r3.1HG0043220.1	LTR	CCGAAA	1776	6	-	Hordeum vulgare	cis-acting element involved in low-temperature responsiveness
HORVU.MOREX.r3.1HG0043220.1	Unnamed__1	CGTGG	251	5	+	Zea mays
HORVU.MOREX.r3.1HG0043220.1	Unnamed__1	CGTGG	376	5	-	Zea mays
HORVU.MOREX.r3.1HG0043220.1	Unnamed__1	CGTGG	664	5	-	Zea mays
HORVU.MOREX.r3.1HG0043220.1	Unnamed__1	CGTGG	935	5	+	Zea mays
HORVU.MOREX.r3.1HG0043220.1	Unnamed__1	CGTGG	1872	5	-	Zea mays
HORVU.MOREX.r3.1HG0043220.1	Unnamed__1	CGTGG	1902	5	-	Zea mays
HORVU.MOREX.r3.1HG0054480.1	CAAT-box	CAAT	69	4	-	Nicotiana glutinosa
HORVU.MOREX.r3.1HG0054480.1	CAAT-box	CAAT	105	4	-	Nicotiana glutinosa
HORVU.MOREX.r3.1HG0054480.1	CAAT-box	CCAAT	116	5	+	Arabidopsis thaliana	common cis-acting element in promoter and enhancer regions
HORVU.MOREX.r3.1HG0054480.1	CAAT-box	CAAT	117	4	+	Nicotiana glutinosa
HORVU.MOREX.r3.1HG0054480.1	CAAT-box	CAAAT	146	5	+	Pisum sativum	common cis-acting element in promoter and enhancer regions
HORVU.MOREX.r3.1HG0054480.1	CAAT-box	CAAT	149	4	-	Nicotiana glutinosa
HORVU.MOREX.r3.1HG0054480.1	CAAT-box	CAAT	230	4	+	Nicotiana glutinosa
HORVU.MOREX.r3.1HG0054480.1	CAAT-box	CAAT	237	4	-	Nicotiana glutinosa
HORVU.MOREX.r3.1HG0054480.1	CAAT-box	CAAT	313	4	+	Nicotiana glutinosa
HORVU.MOREX.r3.1HG0054480.1	CAAT-box	CCAAT	315	5	-	Arabidopsis thaliana	common cis-acting element in promoter and enhancer regions
HORVU.MOREX.r3.1HG0054480.1	CAAT-box	CAAAT	324	5	-	Pisum sativum	common cis-acting element in promoter and enhancer regions
HORVU.MOREX.r3.1HG0054480.1	CAAT-box	CAAT	339	4	+	Nicotiana glutinosa
HORVU.MOREX.r3.1HG0054480.1	CAAT-box	CCAAT	845	5	-	Arabidopsis thaliana	common cis-acting element in promoter and enhancer regions
HORVU.MOREX.r3.1HG0054480.1	CAAT-box	CAAT	850	4	-	Nicotiana glutinosa
HORVU.MOREX.r3.1HG0054480.1	CAAT-box	CAAT	888	4	+	Nicotiana glutinosa
HORVU.MOREX.r3.1HG0054480.1	CAAT-box	CAAAT	919	5	-	Pisum sativum	common cis-acting element in promoter and enhancer regions
HORVU.MOREX.r3.1HG0054480.1	CAAT-box	CAAT	967	4	+	Nicotiana glutinosa
HORVU.MOREX.r3.1HG0054480.1	CAAT-box	CAAT	1137	4	+	Nicotiana glutinosa
HORVU.MOREX.r3.1HG0054480.1	CAAT-box	CAAT	1139	4	-	Nicotiana glutinosa
HORVU.MOREX.r3.1HG0054480.1	CAAT-box	CAAAT	1156	5	-	Pisum sativum	common cis-acting element in promoter and enhancer regions
HORVU.MOREX.r3.1HG0054480.1	CAAT-box	CCAAT	1161	5	-	Arabidopsis thaliana	common cis-acting element in promoter and enhancer regions
HORVU.MOREX.r3.1HG0054480.1	CAAT-box	CCAAT	1195	5	+	Arabidopsis thaliana	common cis-acting element in promoter and enhancer regions
HORVU.MOREX.r3.1HG0054480.1	CAAT-box	CAAT	1196	4	+	Nicotiana glutinosa
HORVU.MOREX.r3.1HG0054480.1	CAAT-box	CAAT	1262	4	-	Nicotiana glutinosa
HORVU.MOREX.r3.1HG0054480.1	CAAT-box	CAAT	1308	4	-	Nicotiana glutinosa
HORVU.MOREX.r3.1HG0054480.1	CAAT-box	CAAT	1341	4	-	Nicotiana glutinosa
HORVU.MOREX.r3.1HG0054480.1	CAAT-box	CAAAT	1348	5	-	Pisum sativum	common cis-acting element in promoter and enhancer regions
HORVU.MOREX.r3.1HG0054480.1	CAAT-box	CAAAT	1366	5	-	Pisum sativum	common cis-acting element in promoter and enhancer regions
HORVU.MOREX.r3.1HG0054480.1	CAAT-box	CAAT	1401	4	-	Nicotiana glutinosa
HORVU.MOREX.r3.1HG0054480.1	CAAT-box	CAAT	1426	4	-	Nicotiana glutinosa
HORVU.MOREX.r3.1HG0054480.1	CAAT-box	CAAT	1524	4	-	Nicotiana glutinosa
HORVU.MOREX.r3.1HG0054480.1	CAAT-box	CAAT	1541	4	-	Nicotiana glutinosa
HORVU.MOREX.r3.1HG0054480.1	CAAT-box	CAAAT	1595	5	+	Pisum sativum	common cis-acting element in promoter and enhancer regions
HORVU.MOREX.r3.1HG0054480.1	CAAT-box	CAAAT	1610	5	-	Pisum sativum	common cis-acting element in promoter and enhancer regions
HORVU.MOREX.r3.1HG0054480.1	CAAT-box	CAAT	1854	4	+	Nicotiana glutinosa
HORVU.MOREX.r3.1HG0054480.1	CAAT-box	CAAT	1876	4	-	Nicotiana glutinosa
HORVU.MOREX.r3.1HG0054480.1	CAAT-box	CCAAT	1944	5	-	Arabidopsis thaliana	common cis-acting element in promoter and enhancer regions
HORVU.MOREX.r3.1HG0054480.1	CCAAT-box	CAACGG	423	6	-	Hordeum vulgare	MYBHv1 binding site
HORVU.MOREX.r3.1HG0054480.1		motif_sequence	170	4	-	organism	short_function
HORVU.MOREX.r3.1HG0054480.1		motif_sequence	303	4	-	organism	short_function
HORVU.MOREX.r3.1HG0054480.1		motif_sequence	372	4	-	organism	short_function
HORVU.MOREX.r3.1HG0054480.1		motif_sequence	405	4	+	organism	short_function
HORVU.MOREX.r3.1HG0054480.1		motif_sequence	418	4	+	organism	short_function
HORVU.MOREX.r3.1HG0054480.1		motif_sequence	1047	4	+	organism	short_function
HORVU.MOREX.r3.1HG0054480.1		motif_sequence	1107	4	-	organism	short_function
HORVU.MOREX.r3.1HG0054480.1		motif_sequence	1122	4	+	organism	short_function
HORVU.MOREX.r3.1HG0054480.1		motif_sequence	1131	4	-	organism	short_function
HORVU.MOREX.r3.1HG0054480.1		motif_sequence	1246	4	-	organism	short_function
HORVU.MOREX.r3.1HG0054480.1		motif_sequence	1285	4	+	organism	short_function
HORVU.MOREX.r3.1HG0054480.1		motif_sequence	1344	4	-	organism	short_function
HORVU.MOREX.r3.1HG0054480.1		motif_sequence	1577	4	-	organism	short_function
HORVU.MOREX.r3.1HG0054480.1		motif_sequence	1635	4	+	organism	short_function
HORVU.MOREX.r3.1HG0054480.1		motif_sequence	1694	4	+	organism	short_function
HORVU.MOREX.r3.1HG0054480.1		motif_sequence	1708	4	+	organism	short_function
HORVU.MOREX.r3.1HG0054480.1		motif_sequence	1762	4	+	organism	short_function
HORVU.MOREX.r3.1HG0054480.1		motif_sequence	1841	4	-	organism	short_function
HORVU.MOREX.r3.1HG0054480.1		motif_sequence	1956	4	+	organism	short_function
HORVU.MOREX.r3.1HG0054480.1		motif_sequence	1990	4	-	organism	short_function
HORVU.MOREX.r3.1HG0054480.1		motif_sequence	1994	4	+	organism	short_function
HORVU.MOREX.r3.1HG0054480.1	MSA-like	TCCAACGGT	422	9	-	Catharanthus roseus	cis-acting element involved in cell cycle regulation
HORVU.MOREX.r3.1HG0054480.1	G-box	CACGAC	1429	6	-	Zea mays	cis-acting regulatory element involved in light responsiveness
HORVU.MOREX.r3.1HG0054480.1	CGTCA-motif	CGTCA	94	5	-	Hordeum vulgare	cis-acting regulatory element involved in the MeJA-responsiveness
HORVU.MOREX.r3.1HG0054480.1	TATA-box	TATA	86	4	+	Arabidopsis thaliana	core promoter element around -30 of transcription start
HORVU.MOREX.r3.1HG0054480.1	TATA-box	TATACA	492	6	-	Helianthus annuus	core promoter element around -30 of transcription start
HORVU.MOREX.r3.1HG0054480.1	TATA-box	TATA	494	4	+	Arabidopsis thaliana	core promoter element around -30 of transcription start
HORVU.MOREX.r3.1HG0054480.1	TATA-box	TATACA	529	6	-	Helianthus annuus	core promoter element around -30 of transcription start
HORVU.MOREX.r3.1HG0054480.1	TATA-box	TATA	531	4	+	Arabidopsis thaliana	core promoter element around -30 of transcription start
HORVU.MOREX.r3.1HG0054480.1	TATA-box	TATA	1168	4	-	Arabidopsis thaliana	core promoter element around -30 of transcription start
HORVU.MOREX.r3.1HG0054480.1	TATA-box	TATA	1438	4	-	Arabidopsis thaliana	core promoter element around -30 of transcription start
HORVU.MOREX.r3.1HG0054480.1	TATA-box	TATAA	1444	5	-	Arabidopsis thaliana	core promoter element around -30 of transcription start
HORVU.MOREX.r3.1HG0054480.1	TATA-box	TATA	1445	4	-	Arabidopsis thaliana	core promoter element around -30 of transcription start
HORVU.MOREX.r3.1HG0054480.1	TATA-box	ccTATAAAaa	1450	9	-	Arabidopsis thaliana	core promoter element around -30 of transcription start
HORVU.MOREX.r3.1HG0054480.1	TATA-box	TATAAAA	1451	7	-	Pisum sativum	core promoter element around -30 of transcription start
HORVU.MOREX.r3.1HG0054480.1	TATA-box	TATAAA	1452	6	-	Helianthus annuus	core promoter element around -30 of transcription start
HORVU.MOREX.r3.1HG0054480.1	TATA-box	TATAA	1453	5	-	Arabidopsis thaliana	core promoter element around -30 of transcription start
HORVU.MOREX.r3.1HG0054480.1	TATA-box	TATA	1454	4	-	Arabidopsis thaliana	core promoter element around -30 of transcription start
HORVU.MOREX.r3.1HG0054480.1	TATA-box	TATA	1551	4	-	Arabidopsis thaliana	core promoter element around -30 of transcription start
HORVU.MOREX.r3.1HG0054480.1	TATA-box	TATA	1723	4	-	Arabidopsis thaliana	core promoter element around -30 of transcription start
HORVU.MOREX.r3.1HG0054480.1	TATA-box	ATATAA	1806	6	+	Brassica oleracea	core promoter element around -30 of transcription start
HORVU.MOREX.r3.1HG0054480.1	TATA-box	TATA	1807	4	-	Arabidopsis thaliana	core promoter element around -30 of transcription start
HORVU.MOREX.r3.1HG0054480.1	TATA-box	TATAA	1930	5	-	Arabidopsis thaliana	core promoter element around -30 of transcription start
HORVU.MOREX.r3.1HG0054480.1	TATA-box	TATA	1931	4	-	Arabidopsis thaliana	core promoter element around -30 of transcription start
HORVU.MOREX.r3.1HG0054480.1	DRE core	GCCGAC	696	6	+	Arabidopsis thaliana
HORVU.MOREX.r3.1HG0054480.1	AAGAA-motif	gGTAAAGAAA	828	9	-	Avena sativa
HORVU.MOREX.r3.1HG0054480.1	AAGAA-motif	GAAAGAA	829	7	-	Avena sativa
HORVU.MOREX.r3.1HG0054480.1	AAGAA-motif	GAAAGAA	1211	7	+	Avena sativa
HORVU.MOREX.r3.1HG0054480.1	AAGAA-motif	GAAAGAA	2009	7	+	Avena sativa
HORVU.MOREX.r3.1HG0054480.1	GATA-motif	GATAGGA	258	7	-	Arabidopsis thaliana	part of a light responsive element
HORVU.MOREX.r3.1HG0054480.1	GATA-motif	GATAGGA	1829	7	+	Arabidopsis thaliana	part of a light responsive element
HORVU.MOREX.r3.1HG0054480.1	ABRE	TACGGTC	1725	7	+	Arabidopsis thaliana	cis-acting element involved in the abscisic acid responsiveness
HORVU.MOREX.r3.1HG0054480.1	TGACG-motif	TGACG	94	5	+	Hordeum vulgare	cis-acting regulatory element involved in the MeJA-responsiveness
HORVU.MOREX.r3.1HG0054480.1	GC-motif	CCCCCG	617	6	+	Zea mays	enhancer-like element involved in anoxic specific inducibility
HORVU.MOREX.r3.1HG0054480.1	MRE	AACCTAA	179	7	+	Petroselinum crispum	MYB binding site involved in light responsiveness
HORVU.MOREX.r3.1HG0054480.1	as-1	TGACG	94	5	+	Arabidopsis thaliana
HORVU.MOREX.r3.1HG0054480.1	TCCC-motif	TCTCCCT	1839	7	-	Spinacia oleracea	part of a light responsive element
HORVU.MOREX.r3.1HG0054480.1	Myb	CAACTG	1532	6	-	Arabidopsis thaliana
HORVU.MOREX.r3.1HG0054480.1	Unnamed__4	CTCC	170	4	-	Petroselinum hortense
HORVU.MOREX.r3.1HG0054480.1	Unnamed__4	CTCC	297	4	-	Petroselinum hortense
HORVU.MOREX.r3.1HG0054480.1	Unnamed__4	CTCC	369	4	-	Petroselinum hortense
HORVU.MOREX.r3.1HG0054480.1	Unnamed__4	CTCC	407	4	+	Petroselinum hortense
HORVU.MOREX.r3.1HG0054480.1	Unnamed__4	CTCC	459	4	-	Petroselinum hortense
HORVU.MOREX.r3.1HG0054480.1	Unnamed__4	CTCC	588	4	+	Petroselinum hortense
HORVU.MOREX.r3.1HG0054480.1	Unnamed__4	CTCC	601	4	+	Petroselinum hortense
HORVU.MOREX.r3.1HG0054480.1	Unnamed__4	CTCC	629	4	+	Petroselinum hortense
HORVU.MOREX.r3.1HG0054480.1	Unnamed__4	CTCC	636	4	+	Petroselinum hortense
HORVU.MOREX.r3.1HG0054480.1	Unnamed__4	CTCC	659	4	+	Petroselinum hortense
HORVU.MOREX.r3.1HG0054480.1	Unnamed__4	CTCC	669	4	+	Petroselinum hortense
HORVU.MOREX.r3.1HG0054480.1	Unnamed__4	CTCC	734	4	+	Petroselinum hortense
HORVU.MOREX.r3.1HG0054480.1	Unnamed__4	CTCC	1008	4	-	Petroselinum hortense
HORVU.MOREX.r3.1HG0054480.1	Unnamed__4	CTCC	1094	4	-	Petroselinum hortense
HORVU.MOREX.r3.1HG0054480.1	Unnamed__4	CTCC	1107	4	-	Petroselinum hortense
HORVU.MOREX.r3.1HG0054480.1	Unnamed__4	CTCC	1514	4	-	Petroselinum hortense
HORVU.MOREX.r3.1HG0054480.1	Unnamed__4	CTCC	1668	4	-	Petroselinum hortense
HORVU.MOREX.r3.1HG0054480.1	Unnamed__4	CTCC	1696	4	+	Petroselinum hortense
HORVU.MOREX.r3.1HG0054480.1	Unnamed__4	CTCC	1764	4	+	Petroselinum hortense
HORVU.MOREX.r3.1HG0054480.1	Unnamed__4	CTCC	1833	4	-	Petroselinum hortense
HORVU.MOREX.r3.1HG0054480.1	Unnamed__4	CTCC	1841	4	-	Petroselinum hortense
HORVU.MOREX.r3.1HG0054480.1	Unnamed__4	CTCC	1921	4	+	Petroselinum hortense
HORVU.MOREX.r3.1HG0054480.1	Unnamed__4	CTCC	1978	4	-	Petroselinum hortense
HORVU.MOREX.r3.1HG0054480.1	MBS	CAACTG	1532	6	-	Arabidopsis thaliana	MYB binding site involved in drought-inducibility
HORVU.MOREX.r3.1HG0054480.1	O2-site	GATGA(C/T)(A/G)TG(A/G)	1755	8	-	Zea mays	cis-acting regulatory element involved in zein metabolism regulation
HORVU.MOREX.r3.1HG0054480.1	MYB recognition site	CCGTTG	423	6	+	Arabidopsis thaliana
HORVU.MOREX.r3.1HG0054480.1	ARE	AAACCA	113	6	+	Zea mays	cis-acting regulatory element essential for the anaerobic induction
HORVU.MOREX.r3.1HG0054480.1	ARE	AAACCA	1179	6	+	Zea mays	cis-acting regulatory element essential for the anaerobic induction
HORVU.MOREX.r3.1HG0054480.1	ARE	AAACCA	1228	6	+	Zea mays	cis-acting regulatory element essential for the anaerobic induction
HORVU.MOREX.r3.1HG0054480.1	ARE	AAACCA	1798	6	-	Zea mays	cis-acting regulatory element essential for the anaerobic induction
HORVU.MOREX.r3.1HG0054480.1	MYC	CAATTG	313	6	+	Arabidopsis thaliana
HORVU.MOREX.r3.1HG0054480.1	MYC	CAATTG	1137	6	-	Arabidopsis thaliana
HORVU.MOREX.r3.1HG0054480.1	MYC	CATTTG	1595	6	-	Arabidopsis thaliana
HORVU.MOREX.r3.1HG0054480.1	MYC	CATGTG	1736	6	+	Arabidopsis thaliana
HORVU.MOREX.r3.1HG0054480.1	GT1-motif	GGTTAA	177	6	-	Arabidopsis thaliana	light responsive element
HORVU.MOREX.r3.1HG0054480.1	MYB	CAACCA	317	6	-	Arabidopsis thaliana
HORVU.MOREX.r3.1HG0054480.1	MYB	CAACCA	380	6	-	Arabidopsis thaliana
HORVU.MOREX.r3.1HG0054480.1	ERE	ATTTTAAA	1174	8	+	Nicotiana glutinos
HORVU.MOREX.r3.1HG0054480.1	Unnamed__2	CCCCGG	166	6	+	Zea mays
HORVU.MOREX.r3.1HG0054480.1	TC-rich repeats	GTTTTCTTAC	938	9	+	Nicotiana tabacum	cis-acting element involved in defense and stress responsiveness
HORVU.MOREX.r3.1HG0054480.1	W box	TTGACC	1469	6	-	Arabidopsis thaliana
HORVU.MOREX.r3.1HG0054480.1	W box	TTGACC	1478	6	+	Arabidopsis thaliana
HORVU.MOREX.r3.1HG0054480.1	P-box	CCTTTTG	811	7	-	Oryza sativa	gibberellin-responsive element
HORVU.MOREX.r3.1HG0054480.1	STRE	AGGGG	77	5	+	Arabidopsis thaliana
HORVU.MOREX.r3.1HG0054480.1	STRE	AGGGG	122	5	-	Arabidopsis thaliana
HORVU.MOREX.r3.1HG0054480.1	STRE	AGGGG	564	5	-	Arabidopsis thaliana
HORVU.MOREX.r3.1HG0054480.1	STRE	AGGGG	626	5	-	Arabidopsis thaliana
HORVU.MOREX.r3.1HG0054480.1	STRE	AGGGG	908	5	-	Arabidopsis thaliana
HORVU.MOREX.r3.1HG0054480.1	STRE	AGGGG	1042	5	+	Arabidopsis thaliana
HORVU.MOREX.r3.1HG0054480.1	STRE	AGGGG	1492	5	+	Arabidopsis thaliana
HORVU.MOREX.r3.1HG0054480.1	STRE	AGGGG	1970	5	-	Arabidopsis thaliana
HORVU.MOREX.r3.1HG0054480.1	Unnamed__1	CGTGG	139	5	+	Zea mays
HORVU.MOREX.r3.1HG0054480.1	Unnamed__1	CGTGG	1431	5	+	Zea mays
HORVU.MOREX.r3.1HG0057900.1	Myb-binding site	CAACAG	1421	6	-	Nicotiana tabacum
HORVU.MOREX.r3.1HG0057900.1	MYC	CATTTG	126	6	+	Arabidopsis thaliana
HORVU.MOREX.r3.1HG0057900.1	MYC	CATGTG	172	6	-	Arabidopsis thaliana
HORVU.MOREX.r3.1HG0057900.1	MYC	CATGTG	454	6	+	Arabidopsis thaliana
HORVU.MOREX.r3.1HG0057900.1	MYC	CATGTG	754	6	-	Arabidopsis thaliana
HORVU.MOREX.r3.1HG0057900.1	MYC	CATGTG	1196	6	+	Arabidopsis thaliana
HORVU.MOREX.r3.1HG0057900.1	ACE	CTAACGTATT	1501	9	-	Petroselinum crispum	cis-acting element involved in light responsiveness
HORVU.MOREX.r3.1HG0057900.1	circadian	CAAAGATATC	1460	9	+	Lycopersicon esculentum	cis-acting regulatory element involved in circadian control
HORVU.MOREX.r3.1HG0057900.1	ARE	AAACCA	522	6	-	Zea mays	cis-acting regulatory element essential for the anaerobic induction
HORVU.MOREX.r3.1HG0057900.1	ARE	AAACCA	871	6	+	Zea mays	cis-acting regulatory element essential for the anaerobic induction
HORVU.MOREX.r3.1HG0057900.1	ARE	AAACCA	878	6	-	Zea mays	cis-acting regulatory element essential for the anaerobic induction
HORVU.MOREX.r3.1HG0057900.1	ARE	AAACCA	1048	6	-	Zea mays	cis-acting regulatory element essential for the anaerobic induction
HORVU.MOREX.r3.1HG0057900.1	AuxRR-core	GGTCCAT	1603	7	+	Nicotiana tabacum	cis-acting regulatory element involved in auxin responsiveness
HORVU.MOREX.r3.1HG0057900.1	I-box	gGATAAGGTG	631	9	+	Zea mays	part of a light responsive element
HORVU.MOREX.r3.1HG0057900.1	MYB recognition site	CCGTTG	78	6	+	Arabidopsis thaliana
HORVU.MOREX.r3.1HG0057900.1	MYB recognition site	CCGTTG	1521	6	-	Arabidopsis thaliana
HORVU.MOREX.r3.1HG0057900.1	O2-site	GATGACATGG	1569	9	+	Zea mays	cis-acting regulatory element involved in zein metabolism regulation
HORVU.MOREX.r3.1HG0057900.1	O2-site	GATGATGTGG	1908	9	-	Zea mays	cis-acting regulatory element involved in zein metabolism regulation
HORVU.MOREX.r3.1HG0057900.1	CCGTCC motif	CCGTCC	239	6	-	Nicotiana tabacum
HORVU.MOREX.r3.1HG0057900.1	Unnamed__4	CTCC	83	4	-	Petroselinum hortense
HORVU.MOREX.r3.1HG0057900.1	Unnamed__4	CTCC	117	4	+	Petroselinum hortense
HORVU.MOREX.r3.1HG0057900.1	Unnamed__4	CTCC	271	4	-	Petroselinum hortense
HORVU.MOREX.r3.1HG0057900.1	Unnamed__4	CTCC	500	4	+	Petroselinum hortense
HORVU.MOREX.r3.1HG0057900.1	Unnamed__4	CTCC	536	4	-	Petroselinum hortense
HORVU.MOREX.r3.1HG0057900.1	Unnamed__4	CTCC	614	4	-	Petroselinum hortense
HORVU.MOREX.r3.1HG0057900.1	Unnamed__4	CTCC	648	4	-	Petroselinum hortense
HORVU.MOREX.r3.1HG0057900.1	Unnamed__4	CTCC	786	4	+	Petroselinum hortense
HORVU.MOREX.r3.1HG0057900.1	Unnamed__4	CTCC	1068	4	-	Petroselinum hortense
HORVU.MOREX.r3.1HG0057900.1	Unnamed__4	CTCC	1077	4	-	Petroselinum hortense
HORVU.MOREX.r3.1HG0057900.1	Unnamed__4	CTCC	1142	4	-	Petroselinum hortense
HORVU.MOREX.r3.1HG0057900.1	Unnamed__4	CTCC	1145	4	-	Petroselinum hortense
HORVU.MOREX.r3.1HG0057900.1	Unnamed__4	CTCC	1201	4	-	Petroselinum hortense
HORVU.MOREX.r3.1HG0057900.1	Unnamed__4	CTCC	1364	4	-	Petroselinum hortense
HORVU.MOREX.r3.1HG0057900.1	Unnamed__4	CTCC	1411	4	+	Petroselinum hortense
HORVU.MOREX.r3.1HG0057900.1	Unnamed__4	CTCC	1444	4	+	Petroselinum hortense
HORVU.MOREX.r3.1HG0057900.1	Unnamed__4	CTCC	1555	4	+	Petroselinum hortense
HORVU.MOREX.r3.1HG0057900.1	Unnamed__4	CTCC	1620	4	+	Petroselinum hortense
HORVU.MOREX.r3.1HG0057900.1	Unnamed__4	CTCC	1669	4	-	Petroselinum hortense
HORVU.MOREX.r3.1HG0057900.1	Unnamed__4	CTCC	1741	4	+	Petroselinum hortense
HORVU.MOREX.r3.1HG0057900.1	Unnamed__4	CTCC	1759	4	-	Petroselinum hortense
HORVU.MOREX.r3.1HG0057900.1	Unnamed__4	CTCC	1792	4	-	Petroselinum hortense
HORVU.MOREX.r3.1HG0057900.1	Unnamed__4	CTCC	1803	4	-	Petroselinum hortense
HORVU.MOREX.r3.1HG0057900.1	Unnamed__4	CTCC	1875	4	+	Petroselinum hortense
HORVU.MOREX.r3.1HG0057900.1	Unnamed__4	CTCC	1884	4	+	Petroselinum hortense
HORVU.MOREX.r3.1HG0057900.1	Unnamed__4	CTCC	1888	4	+	Petroselinum hortense
HORVU.MOREX.r3.1HG0057900.1	Unnamed__4	CTCC	1906	4	+	Petroselinum hortense
HORVU.MOREX.r3.1HG0057900.1	Unnamed__4	CTCC	1957	4	+	Petroselinum hortense
HORVU.MOREX.r3.1HG0057900.1	Unnamed__4	CTCC	2009	4	+	Petroselinum hortense
HORVU.MOREX.r3.1HG0057900.1	AC-I	(T/C)C(T/C)(C/T)ACC(T/C)ACC	1848	8.5	+	Phaseolus vulgaris
HORVU.MOREX.r3.1HG0057900.1	Unnamed__1	CGTGG	1528	5	-	Zea mays
HORVU.MOREX.r3.1HG0057900.1	Unnamed__1	CGTGG	1589	5	+	Zea mays
HORVU.MOREX.r3.1HG0057900.1	STRE	AGGGG	572	5	+	Arabidopsis thaliana
HORVU.MOREX.r3.1HG0057900.1	STRE	AGGGG	1597	5	+	Arabidopsis thaliana
HORVU.MOREX.r3.1HG0057900.1	STRE	AGGGG	1800	5	+	Arabidopsis thaliana
HORVU.MOREX.r3.1HG0057900.1	STRE	AGGGG	1890	5	-	Arabidopsis thaliana
HORVU.MOREX.r3.1HG0057900.1	W box	TTGACC	425	6	-	Arabidopsis thaliana
HORVU.MOREX.r3.1HG0057900.1	AT~TATA-box	TATATA	823	6	+	Arabidopsis thaliana
HORVU.MOREX.r3.1HG0057900.1	A-box	CCGTCC	239	6	-	Petroselinum crispum	cis-acting regulatory element
HORVU.MOREX.r3.1HG0057900.1	ERE	ATTTTAAA	1637	8	-	Nicotiana glutinos
HORVU.MOREX.r3.1HG0057900.1	MYB	CAACCA	852	6	+	Arabidopsis thaliana
HORVU.MOREX.r3.1HG0057900.1	MYB	TAACCA	1303	6	-	Arabidopsis thaliana
HORVU.MOREX.r3.1HG0057900.1	MYB	CAACAG	1421	6	-	Arabidopsis thaliana
HORVU.MOREX.r3.1HG0057900.1	TATA-box	ATATAT	517	6	+	Brassica napus	core promoter element around -30 of transcription start
HORVU.MOREX.r3.1HG0057900.1	TATA-box	TATA	518	4	+	Arabidopsis thaliana	core promoter element around -30 of transcription start
HORVU.MOREX.r3.1HG0057900.1	TATA-box	TATACA	630	6	-	Helianthus annuus	core promoter element around -30 of transcription start
HORVU.MOREX.r3.1HG0057900.1	TATA-box	TATA	632	4	+	Arabidopsis thaliana	core promoter element around -30 of transcription start
HORVU.MOREX.r3.1HG0057900.1	TATA-box	TATA	658	4	+	Arabidopsis thaliana	core promoter element around -30 of transcription start
HORVU.MOREX.r3.1HG0057900.1	TATA-box	ATATAA	691	6	+	Brassica oleracea	core promoter element around -30 of transcription start
HORVU.MOREX.r3.1HG0057900.1	TATA-box	TATA	692	4	+	Arabidopsis thaliana	core promoter element around -30 of transcription start
HORVU.MOREX.r3.1HG0057900.1	TATA-box	ATTATA	769	6	+	Brassica napus	core promoter element around -30 of transcription start
HORVU.MOREX.r3.1HG0057900.1	TATA-box	TATAA	770	5	-	Arabidopsis thaliana	core promoter element around -30 of transcription start
HORVU.MOREX.r3.1HG0057900.1	TATA-box	TATA	771	4	+	Arabidopsis thaliana	core promoter element around -30 of transcription start
HORVU.MOREX.r3.1HG0057900.1	TATA-box	ATATAT	822	6	+	Brassica napus	core promoter element around -30 of transcription start
HORVU.MOREX.r3.1HG0057900.1	TATA-box	TATATA	823	6	+	Arabidopsis thaliana	core promoter element around -30 of transcription start
HORVU.MOREX.r3.1HG0057900.1	TATA-box	ATATAT	824	6	+	Brassica napus	core promoter element around -30 of transcription start
HORVU.MOREX.r3.1HG0057900.1	TATA-box	TATA	825	4	+	Arabidopsis thaliana	core promoter element around -30 of transcription start
HORVU.MOREX.r3.1HG0057900.1	TATA-box	TATA	846	4	+	Arabidopsis thaliana	core promoter element around -30 of transcription start
HORVU.MOREX.r3.1HG0057900.1	TATA-box	ATATAT	1014	6	-	Brassica napus	core promoter element around -30 of transcription start
HORVU.MOREX.r3.1HG0057900.1	TATA-box	TATA	1015	4	-	Arabidopsis thaliana	core promoter element around -30 of transcription start
HORVU.MOREX.r3.1HG0057900.1	TATA-box	ATATAA	1149	6	+	Brassica oleracea	core promoter element around -30 of transcription start
HORVU.MOREX.r3.1HG0057900.1	TATA-box	TATA	1150	4	-	Arabidopsis thaliana	core promoter element around -30 of transcription start
HORVU.MOREX.r3.1HG0057900.1	TATA-box	TATACA	1309	6	-	Helianthus annuus	core promoter element around -30 of transcription start
HORVU.MOREX.r3.1HG0057900.1	TATA-box	TATA	1311	4	-	Arabidopsis thaliana	core promoter element around -30 of transcription start
HORVU.MOREX.r3.1HG0057900.1	TATA-box	TATAA	1784	5	-	Arabidopsis thaliana	core promoter element around -30 of transcription start
HORVU.MOREX.r3.1HG0057900.1	TATA-box	TATA	1785	4	-	Arabidopsis thaliana	core promoter element around -30 of transcription start
HORVU.MOREX.r3.1HG0057900.1	MYB-like sequence	TAACCA	1303	6	-	Arabidopsis thaliana
HORVU.MOREX.r3.1HG0057900.1	CGTCA-motif	CGTCA	1265	5	-	Hordeum vulgare	cis-acting regulatory element involved in the MeJA-responsiveness
HORVU.MOREX.r3.1HG0057900.1	CGTCA-motif	CGTCA	1979	5	+	Hordeum vulgare	cis-acting regulatory element involved in the MeJA-responsiveness
HORVU.MOREX.r3.1HG0057900.1	WRE3	CCACCT	445	6	-	Pisum sativum
HORVU.MOREX.r3.1HG0057900.1	WRE3	CCACCT	1079	6	-	Pisum sativum
HORVU.MOREX.r3.1HG0057900.1	WRE3	CCACCT	1203	6	-	Pisum sativum
HORVU.MOREX.r3.1HG0057900.1	MSA-like	(T/C)C(T/C)AACGG(T/C)(T/C)A	75	8.5	-	Catharanthus roseus	cis-acting element involved in cell cycle regulation
HORVU.MOREX.r3.1HG0057900.1	MSA-like	TCCAACGGT	1519	9	+	Catharanthus roseus	cis-acting element involved in cell cycle regulation
HORVU.MOREX.r3.1HG0057900.1	CCAAT-box	CAACGG	78	6	-	Hordeum vulgare	MYBHv1 binding site
HORVU.MOREX.r3.1HG0057900.1	CCAAT-box	CAACGG	1521	6	+	Hordeum vulgare	MYBHv1 binding site
HORVU.MOREX.r3.1HG0057900.1		motif_sequence	106	4	+	organism	short_function
HORVU.MOREX.r3.1HG0057900.1		motif_sequence	171	4	-	organism	short_function
HORVU.MOREX.r3.1HG0057900.1		motif_sequence	292	4	+	organism	short_function
HORVU.MOREX.r3.1HG0057900.1		motif_sequence	508	4	+	organism	short_function
HORVU.MOREX.r3.1HG0057900.1		motif_sequence	784	4	+	organism	short_function
HORVU.MOREX.r3.1HG0057900.1		motif_sequence	998	4	+	organism	short_function
HORVU.MOREX.r3.1HG0057900.1		motif_sequence	1145	4	-	organism	short_function
HORVU.MOREX.r3.1HG0057900.1		motif_sequence	1175	4	-	organism	short_function
HORVU.MOREX.r3.1HG0057900.1		motif_sequence	1193	4	-	organism	short_function
HORVU.MOREX.r3.1HG0057900.1		motif_sequence	1351	4	+	organism	short_function
HORVU.MOREX.r3.1HG0057900.1		motif_sequence	1450	4	-	organism	short_function
HORVU.MOREX.r3.1HG0057900.1		motif_sequence	1629	4	-	organism	short_function
HORVU.MOREX.r3.1HG0057900.1		motif_sequence	1669	4	-	organism	short_function
HORVU.MOREX.r3.1HG0057900.1		motif_sequence	1873	4	+	organism	short_function
HORVU.MOREX.r3.1HG0057900.1		motif_sequence	1973	4	+	organism	short_function
HORVU.MOREX.r3.1HG0057900.1	CAAT-box	CAAAT	28	5	+	Pisum sativum	common cis-acting element in promoter and enhancer regions
HORVU.MOREX.r3.1HG0057900.1	CAAT-box	CAAAT	127	5	-	Pisum sativum	common cis-acting element in promoter and enhancer regions
HORVU.MOREX.r3.1HG0057900.1	CAAT-box	CAAT	165	4	-	Nicotiana glutinosa
HORVU.MOREX.r3.1HG0057900.1	CAAT-box	CCAAT	268	5	-	Arabidopsis thaliana	common cis-acting element in promoter and enhancer regions
HORVU.MOREX.r3.1HG0057900.1	CAAT-box	CCAAT	306	5	-	Arabidopsis thaliana	common cis-acting element in promoter and enhancer regions
HORVU.MOREX.r3.1HG0057900.1	CAAT-box	CAAT	428	4	+	Nicotiana glutinosa
HORVU.MOREX.r3.1HG0057900.1	CAAT-box	CAAAT	430	5	-	Pisum sativum	common cis-acting element in promoter and enhancer regions
HORVU.MOREX.r3.1HG0057900.1	CAAT-box	CAAAT	440	5	-	Pisum sativum	common cis-acting element in promoter and enhancer regions
HORVU.MOREX.r3.1HG0057900.1	CAAT-box	CAAT	711	4	-	Nicotiana glutinosa
HORVU.MOREX.r3.1HG0057900.1	CAAT-box	CCAAT	874	5	+	Arabidopsis thaliana	common cis-acting element in promoter and enhancer regions
HORVU.MOREX.r3.1HG0057900.1	CAAT-box	CAAT	875	4	+	Nicotiana glutinosa
HORVU.MOREX.r3.1HG0057900.1	CAAT-box	CAAT	931	4	+	Nicotiana glutinosa
HORVU.MOREX.r3.1HG0057900.1	CAAT-box	CAAAT	937	5	-	Pisum sativum	common cis-acting element in promoter and enhancer regions
HORVU.MOREX.r3.1HG0057900.1	CAAT-box	CAAAT	983	5	-	Pisum sativum	common cis-acting element in promoter and enhancer regions
HORVU.MOREX.r3.1HG0057900.1	CAAT-box	CAAAT	1022	5	-	Pisum sativum	common cis-acting element in promoter and enhancer regions
HORVU.MOREX.r3.1HG0057900.1	CAAT-box	CAAAT	1106	5	+	Pisum sativum	common cis-acting element in promoter and enhancer regions
HORVU.MOREX.r3.1HG0057900.1	CAAT-box	CAAT	1253	4	+	Nicotiana glutinosa
HORVU.MOREX.r3.1HG0057900.1	CAAT-box	CAAT	1259	4	+	Nicotiana glutinosa
HORVU.MOREX.r3.1HG0057900.1	CAAT-box	CCAAT	1271	5	+	Arabidopsis thaliana	common cis-acting element in promoter and enhancer regions
HORVU.MOREX.r3.1HG0057900.1	CAAT-box	CAAT	1272	4	+	Nicotiana glutinosa
HORVU.MOREX.r3.1HG0057900.1	CAAT-box	CAAT	1356	4	+	Nicotiana glutinosa
HORVU.MOREX.r3.1HG0057900.1	CAAT-box	CAAAT	1432	5	+	Pisum sativum	common cis-acting element in promoter and enhancer regions
HORVU.MOREX.r3.1HG0057900.1	CAAT-box	CCAAT	1437	5	+	Arabidopsis thaliana	common cis-acting element in promoter and enhancer regions
HORVU.MOREX.r3.1HG0057900.1	CAAT-box	CAAT	1438	4	+	Nicotiana glutinosa
HORVU.MOREX.r3.1HG0057900.1	CAAT-box	CAAT	1561	4	+	Nicotiana glutinosa
HORVU.MOREX.r3.1HG0057900.1	CAAT-box	CAAT	1614	4	+	Nicotiana glutinosa
HORVU.MOREX.r3.1HG0057900.1	CAAT-box	CAAT	1654	4	-	Nicotiana glutinosa
HORVU.MOREX.r3.1HG0057900.1	CAAT-box	CAAAT	1909	5	+	Pisum sativum	common cis-acting element in promoter and enhancer regions
HORVU.MOREX.r3.1HG0057900.1	CAAT-box	CCAAT	1924	5	+	Arabidopsis thaliana	common cis-acting element in promoter and enhancer regions
HORVU.MOREX.r3.1HG0057900.1	CAAT-box	CAAT	1925	4	+	Nicotiana glutinosa
HORVU.MOREX.r3.1HG0057900.1	as-1	TGACG	1265	5	+	Arabidopsis thaliana
HORVU.MOREX.r3.1HG0057900.1	as-1	TGACG	1979	5	-	Arabidopsis thaliana
HORVU.MOREX.r3.1HG0057900.1	SARE	TTCGACCATCTT	737	11	-	Nicotiana tabacum	cis-acting element involved in salicylic acid responsiveness
HORVU.MOREX.r3.1HG0057900.1	box S	AGCCACC	1080	7	-	Arabidopsis thaliana
HORVU.MOREX.r3.1HG0057900.1	box S	AGCCACC	1844	7	+	Arabidopsis thaliana
HORVU.MOREX.r3.1HG0057900.1	TGACG-motif	TGACG	1265	5	+	Hordeum vulgare	cis-acting regulatory element involved in the MeJA-responsiveness
HORVU.MOREX.r3.1HG0057900.1	TGACG-motif	TGACG	1979	5	-	Hordeum vulgare	cis-acting regulatory element involved in the MeJA-responsiveness
HORVU.MOREX.r3.1HG0057900.1	Myc	TCTCTTA	1131	7	-	Arabidopsis thaliana
HORVU.MOREX.r3.1HG0057900.1	CCGTCC-box	CCGTCC	239	6	-	Petroselinum hortense
HORVU.MOREX.r3.1HG0057900.1	DRE core	GCCGAC	1233	6	-	Arabidopsis thaliana
HORVU.MOREX.r3.1HG0066390.1	CGTCA-motif	CGTCA	197	5	+	Hordeum vulgare	cis-acting regulatory element involved in the MeJA-responsiveness
HORVU.MOREX.r3.1HG0066390.1	MYB-like sequence	TAACCA	787	6	+	Arabidopsis thaliana
HORVU.MOREX.r3.1HG0066390.1	TATA-box	ATATAA	411	6	+	Brassica oleracea	core promoter element around -30 of transcription start
HORVU.MOREX.r3.1HG0066390.1	TATA-box	TATA	412	4	+	Arabidopsis thaliana	core promoter element around -30 of transcription start
HORVU.MOREX.r3.1HG0066390.1	TATA-box	TATA	486	4	+	Arabidopsis thaliana	core promoter element around -30 of transcription start
HORVU.MOREX.r3.1HG0066390.1	TATA-box	ATATAA	596	6	+	Brassica oleracea	core promoter element around -30 of transcription start
HORVU.MOREX.r3.1HG0066390.1	TATA-box	TATA	597	4	+	Arabidopsis thaliana	core promoter element around -30 of transcription start
HORVU.MOREX.r3.1HG0066390.1	TATA-box	TATAAAT	661	7	-	Brassica juncea	core promoter element around -30 of transcription start
HORVU.MOREX.r3.1HG0066390.1	TATA-box	TATAAA	662	6	-	Helianthus annuus	core promoter element around -30 of transcription start
HORVU.MOREX.r3.1HG0066390.1	TATA-box	TATAA	663	5	-	Arabidopsis thaliana	core promoter element around -30 of transcription start
HORVU.MOREX.r3.1HG0066390.1	TATA-box	TATA	664	4	+	Arabidopsis thaliana	core promoter element around -30 of transcription start
HORVU.MOREX.r3.1HG0066390.1	TATA-box	TATA	717	4	+	Arabidopsis thaliana	core promoter element around -30 of transcription start
HORVU.MOREX.r3.1HG0066390.1	TATA-box	ATTATA	729	6	+	Brassica napus	core promoter element around -30 of transcription start
HORVU.MOREX.r3.1HG0066390.1	TATA-box	TATAA	730	5	-	Arabidopsis thaliana	core promoter element around -30 of transcription start
HORVU.MOREX.r3.1HG0066390.1	TATA-box	TATA	731	4	+	Arabidopsis thaliana	core promoter element around -30 of transcription start
HORVU.MOREX.r3.1HG0066390.1	TATA-box	ATATAT	752	6	+	Brassica napus	core promoter element around -30 of transcription start
HORVU.MOREX.r3.1HG0066390.1	TATA-box	TATATA	753	6	+	Arabidopsis thaliana	core promoter element around -30 of transcription start
HORVU.MOREX.r3.1HG0066390.1	TATA-box	ATATAT	754	6	+	Brassica napus	core promoter element around -30 of transcription start
HORVU.MOREX.r3.1HG0066390.1	TATA-box	TATA	755	4	+	Arabidopsis thaliana	core promoter element around -30 of transcription start
HORVU.MOREX.r3.1HG0066390.1	TATA-box	TATAAA	770	6	-	Helianthus annuus	core promoter element around -30 of transcription start
HORVU.MOREX.r3.1HG0066390.1	TATA-box	TATAA	771	5	-	Arabidopsis thaliana	core promoter element around -30 of transcription start
HORVU.MOREX.r3.1HG0066390.1	TATA-box	TATA	772	4	+	Arabidopsis thaliana	core promoter element around -30 of transcription start
HORVU.MOREX.r3.1HG0066390.1	TATA-box	TATA	831	4	+	Arabidopsis thaliana	core promoter element around -30 of transcription start
HORVU.MOREX.r3.1HG0066390.1	TATA-box	ATATAT	845	6	+	Brassica napus	core promoter element around -30 of transcription start
HORVU.MOREX.r3.1HG0066390.1	TATA-box	TATA	846	4	+	Arabidopsis thaliana	core promoter element around -30 of transcription start
HORVU.MOREX.r3.1HG0066390.1	G-box	CACGTC	162	6	+	Zea mays	cis-acting regulatory element involved in light responsiveness
HORVU.MOREX.r3.1HG0066390.1	WRE3	CCACCT	981	6	-	Pisum sativum
HORVU.MOREX.r3.1HG0066390.1	WRE3	CCACCT	1833	6	+	Pisum sativum
HORVU.MOREX.r3.1HG0066390.1	CAAT-box	CAAT	32	4	+	Nicotiana glutinosa
HORVU.MOREX.r3.1HG0066390.1	CAAT-box	CAAT	73	4	-	Nicotiana glutinosa
HORVU.MOREX.r3.1HG0066390.1	CAAT-box	CAAT	93	4	-	Nicotiana glutinosa
HORVU.MOREX.r3.1HG0066390.1	CAAT-box	CAAT	103	4	-	Nicotiana glutinosa
HORVU.MOREX.r3.1HG0066390.1	CAAT-box	CAAT	189	4	+	Nicotiana glutinosa
HORVU.MOREX.r3.1HG0066390.1	CAAT-box	TGCCAAC	382	7	+	Petunia hybrida	common cis-acting element in promoter and enhancer regions
HORVU.MOREX.r3.1HG0066390.1	CAAT-box	CAAT	393	4	+	Nicotiana glutinosa
HORVU.MOREX.r3.1HG0066390.1	CAAT-box	CAAT	502	4	+	Nicotiana glutinosa
HORVU.MOREX.r3.1HG0066390.1	CAAT-box	CAAAT	603	5	-	Pisum sativum	common cis-acting element in promoter and enhancer regions
HORVU.MOREX.r3.1HG0066390.1	CAAT-box	CAAT	643	4	-	Nicotiana glutinosa
HORVU.MOREX.r3.1HG0066390.1	CAAT-box	CAAT	677	4	+	Nicotiana glutinosa
HORVU.MOREX.r3.1HG0066390.1	CAAT-box	CAAAT	758	5	-	Pisum sativum	common cis-acting element in promoter and enhancer regions
HORVU.MOREX.r3.1HG0066390.1	CAAT-box	CAAAT	791	5	+	Pisum sativum	common cis-acting element in promoter and enhancer regions
HORVU.MOREX.r3.1HG0066390.1	CAAT-box	CAACCAACTCC	916	10	+	Arabidopsis thaliana	common cis-acting element in promoter and enhancer regions
HORVU.MOREX.r3.1HG0066390.1	CAAT-box	CAAAT	920	5	+	Pisum sativum	common cis-acting element in promoter and enhancer regions
HORVU.MOREX.r3.1HG0066390.1	CAAT-box	CAAT	1342	4	+	Nicotiana glutinosa
HORVU.MOREX.r3.1HG0066390.1	CAAT-box	CAAT	1703	4	-	Nicotiana glutinosa
HORVU.MOREX.r3.1HG0066390.1	CAAT-box	CAAT	1987	4	-	Nicotiana glutinosa
HORVU.MOREX.r3.1HG0066390.1		motif_sequence	474	4	+	organism	short_function
HORVU.MOREX.r3.1HG0066390.1		motif_sequence	575	4	+	organism	short_function
HORVU.MOREX.r3.1HG0066390.1		motif_sequence	685	4	-	organism	short_function
HORVU.MOREX.r3.1HG0066390.1		motif_sequence	1029	4	-	organism	short_function
HORVU.MOREX.r3.1HG0066390.1		motif_sequence	1100	4	-	organism	short_function
HORVU.MOREX.r3.1HG0066390.1		motif_sequence	1110	4	-	organism	short_function
HORVU.MOREX.r3.1HG0066390.1		motif_sequence	1115	4	-	organism	short_function
HORVU.MOREX.r3.1HG0066390.1		motif_sequence	1120	4	-	organism	short_function
HORVU.MOREX.r3.1HG0066390.1		motif_sequence	1157	4	-	organism	short_function
HORVU.MOREX.r3.1HG0066390.1		motif_sequence	1245	4	+	organism	short_function
HORVU.MOREX.r3.1HG0066390.1		motif_sequence	1279	4	-	organism	short_function
HORVU.MOREX.r3.1HG0066390.1		motif_sequence	1285	4	+	organism	short_function
HORVU.MOREX.r3.1HG0066390.1		motif_sequence	1337	4	+	organism	short_function
HORVU.MOREX.r3.1HG0066390.1		motif_sequence	1358	4	+	organism	short_function
HORVU.MOREX.r3.1HG0066390.1		motif_sequence	1447	4	-	organism	short_function
HORVU.MOREX.r3.1HG0066390.1		motif_sequence	1618	4	+	organism	short_function
HORVU.MOREX.r3.1HG0066390.1		motif_sequence	1671	4	-	organism	short_function
HORVU.MOREX.r3.1HG0066390.1		motif_sequence	1699	4	-	organism	short_function
HORVU.MOREX.r3.1HG0066390.1		motif_sequence	1720	4	-	organism	short_function
HORVU.MOREX.r3.1HG0066390.1		motif_sequence	1795	4	-	organism	short_function
HORVU.MOREX.r3.1HG0066390.1		motif_sequence	1823	4	-	organism	short_function
HORVU.MOREX.r3.1HG0066390.1		motif_sequence	1871	4	+	organism	short_function
HORVU.MOREX.r3.1HG0066390.1		motif_sequence	1889	4	+	organism	short_function
HORVU.MOREX.r3.1HG0066390.1		motif_sequence	1894	4	+	organism	short_function
HORVU.MOREX.r3.1HG0066390.1		motif_sequence	1899	4	+	organism	short_function
HORVU.MOREX.r3.1HG0066390.1		motif_sequence	1904	4	+	organism	short_function
HORVU.MOREX.r3.1HG0066390.1		motif_sequence	1909	4	+	organism	short_function
HORVU.MOREX.r3.1HG0066390.1		motif_sequence	1930	4	+	organism	short_function
HORVU.MOREX.r3.1HG0066390.1		motif_sequence	1991	4	+	organism	short_function
HORVU.MOREX.r3.1HG0066390.1	RY-element	CATGCATG	376	8	+	Helianthus annuus	cis-acting regulatory element involved in seed-specific regulation
HORVU.MOREX.r3.1HG0066390.1	as-1	TGACG	197	5	-	Arabidopsis thaliana
HORVU.MOREX.r3.1HG0066390.1	TCCC-motif	TCTCCCT	1669	7	-	Spinacia oleracea	part of a light responsive element
HORVU.MOREX.r3.1HG0066390.1	TCCC-motif	TCTCCCT	1718	7	-	Spinacia oleracea	part of a light responsive element
HORVU.MOREX.r3.1HG0066390.1	GC-motif	CCCCCG	313	6	-	Zea mays	enhancer-like element involved in anoxic specific inducibility
HORVU.MOREX.r3.1HG0066390.1	GC-motif	CCCCCG	1883	6	+	Zea mays	enhancer-like element involved in anoxic specific inducibility
HORVU.MOREX.r3.1HG0066390.1	GC-motif	CCCCCG	1999	6	-	Zea mays	enhancer-like element involved in anoxic specific inducibility
HORVU.MOREX.r3.1HG0066390.1	Box 4	ATTAAT	701	6	+	Petroselinum crispum	part of a conserved DNA module involved in light responsiveness
HORVU.MOREX.r3.1HG0066390.1	ABRE	ACGTG	162	5	-	Arabidopsis thaliana	cis-acting element involved in the abscisic acid responsiveness
HORVU.MOREX.r3.1HG0066390.1	TGACG-motif	TGACG	197	5	-	Hordeum vulgare	cis-acting regulatory element involved in the MeJA-responsiveness
HORVU.MOREX.r3.1HG0066390.1	Unnamed__16	GCTGCCCGTC	344	9	+	Zea mays
HORVU.MOREX.r3.1HG0066390.1	AAGAA-motif	GAAAGAA	1770	7	+	Avena sativa
HORVU.MOREX.r3.1HG0066390.1	CCGTCC-box	CCGTCC	1061	6	+	Petroselinum hortense
HORVU.MOREX.r3.1HG0066390.1	CCGTCC-box	CCGTCC	1072	6	+	Petroselinum hortense
HORVU.MOREX.r3.1HG0066390.1	MYC	CATGTG	1250	6	-	Arabidopsis thaliana
HORVU.MOREX.r3.1HG0066390.1	MYC	CATGTG	1347	6	+	Arabidopsis thaliana
HORVU.MOREX.r3.1HG0066390.1	GT1-motif	GGTTAA	786	6	-	Arabidopsis thaliana	light responsive element
HORVU.MOREX.r3.1HG0066390.1	I-box	gGATAAGGTG	1686	9	+	Zea mays	part of a light responsive element
HORVU.MOREX.r3.1HG0066390.1	ARE	AAACCA	1261	6	+	Zea mays	cis-acting regulatory element essential for the anaerobic induction
HORVU.MOREX.r3.1HG0066390.1	circadian	CAAAGATATC	741	9	-	Lycopersicon esculentum	cis-acting regulatory element involved in circadian control
HORVU.MOREX.r3.1HG0066390.1	AT-rich element	ATAGAAATCAA	94	11	-	Glycine max	binding site of AT-rich DNA binding protein (ATBP-1)
HORVU.MOREX.r3.1HG0066390.1	O2-site	GATGATGTGG	1864	9	-	Zea mays	cis-acting regulatory element involved in zein metabolism regulation
HORVU.MOREX.r3.1HG0066390.1	CCGTCC motif	CCGTCC	1061	6	+	Nicotiana tabacum
HORVU.MOREX.r3.1HG0066390.1	CCGTCC motif	CCGTCC	1072	6	+	Nicotiana tabacum
HORVU.MOREX.r3.1HG0066390.1	Unnamed__4	CTCC	357	4	-	Petroselinum hortense
HORVU.MOREX.r3.1HG0066390.1	Unnamed__4	CTCC	577	4	+	Petroselinum hortense
HORVU.MOREX.r3.1HG0066390.1	Unnamed__4	CTCC	883	4	-	Petroselinum hortense
HORVU.MOREX.r3.1HG0066390.1	Unnamed__4	CTCC	887	4	-	Petroselinum hortense
HORVU.MOREX.r3.1HG0066390.1	Unnamed__4	CTCC	986	4	-	Petroselinum hortense
HORVU.MOREX.r3.1HG0066390.1	Unnamed__4	CTCC	1012	4	+	Petroselinum hortense
HORVU.MOREX.r3.1HG0066390.1	Unnamed__4	CTCC	1016	4	+	Petroselinum hortense
HORVU.MOREX.r3.1HG0066390.1	Unnamed__4	CTCC	1066	4	+	Petroselinum hortense
HORVU.MOREX.r3.1HG0066390.1	Unnamed__4	CTCC	1070	4	+	Petroselinum hortense
HORVU.MOREX.r3.1HG0066390.1	Unnamed__4	CTCC	1162	4	-	Petroselinum hortense
HORVU.MOREX.r3.1HG0066390.1	Unnamed__4	CTCC	1182	4	+	Petroselinum hortense
HORVU.MOREX.r3.1HG0066390.1	Unnamed__4	CTCC	1192	4	+	Petroselinum hortense
HORVU.MOREX.r3.1HG0066390.1	Unnamed__4	CTCC	1269	4	+	Petroselinum hortense
HORVU.MOREX.r3.1HG0066390.1	Unnamed__4	CTCC	1287	4	+	Petroselinum hortense
HORVU.MOREX.r3.1HG0066390.1	Unnamed__4	CTCC	1430	4	-	Petroselinum hortense
HORVU.MOREX.r3.1HG0066390.1	Unnamed__4	CTCC	1444	4	-	Petroselinum hortense
HORVU.MOREX.r3.1HG0066390.1	Unnamed__4	CTCC	1447	4	-	Petroselinum hortense
HORVU.MOREX.r3.1HG0066390.1	Unnamed__4	CTCC	1498	4	-	Petroselinum hortense
HORVU.MOREX.r3.1HG0066390.1	Unnamed__4	CTCC	1593	4	+	Petroselinum hortense
HORVU.MOREX.r3.1HG0066390.1	Unnamed__4	CTCC	1599	4	+	Petroselinum hortense
HORVU.MOREX.r3.1HG0066390.1	Unnamed__4	CTCC	1620	4	+	Petroselinum hortense
HORVU.MOREX.r3.1HG0066390.1	Unnamed__4	CTCC	1671	4	-	Petroselinum hortense
HORVU.MOREX.r3.1HG0066390.1	Unnamed__4	CTCC	1720	4	-	Petroselinum hortense
HORVU.MOREX.r3.1HG0066390.1	Unnamed__4	CTCC	1795	4	-	Petroselinum hortense
HORVU.MOREX.r3.1HG0066390.1	Unnamed__4	CTCC	1851	4	+	Petroselinum hortense
HORVU.MOREX.r3.1HG0066390.1	Unnamed__4	CTCC	1855	4	+	Petroselinum hortense
HORVU.MOREX.r3.1HG0066390.1	Unnamed__4	CTCC	1858	4	+	Petroselinum hortense
HORVU.MOREX.r3.1HG0066390.1	Unnamed__4	CTCC	1873	4	+	Petroselinum hortense
HORVU.MOREX.r3.1HG0066390.1	Unnamed__4	CTCC	1876	4	+	Petroselinum hortense
HORVU.MOREX.r3.1HG0066390.1	Unnamed__4	CTCC	1880	4	+	Petroselinum hortense
HORVU.MOREX.r3.1HG0066390.1	Unnamed__4	CTCC	1891	4	+	Petroselinum hortense
HORVU.MOREX.r3.1HG0066390.1	Unnamed__4	CTCC	1896	4	+	Petroselinum hortense
HORVU.MOREX.r3.1HG0066390.1	Unnamed__4	CTCC	1901	4	+	Petroselinum hortense
HORVU.MOREX.r3.1HG0066390.1	Unnamed__4	CTCC	1906	4	+	Petroselinum hortense
HORVU.MOREX.r3.1HG0066390.1	Unnamed__4	CTCC	1911	4	+	Petroselinum hortense
HORVU.MOREX.r3.1HG0066390.1	Unnamed__4	CTCC	1959	4	+	Petroselinum hortense
HORVU.MOREX.r3.1HG0066390.1	Unnamed__4	CTCC	1973	4	+	Petroselinum hortense
HORVU.MOREX.r3.1HG0066390.1	Unnamed__4	CTCC	1979	4	-	Petroselinum hortense
HORVU.MOREX.r3.1HG0066390.1	Unnamed__4	CTCC	1996	4	+	Petroselinum hortense
HORVU.MOREX.r3.1HG0066390.1	W box	TTGACC	607	6	-	Arabidopsis thaliana
HORVU.MOREX.r3.1HG0066390.1	LTR	CCGAAA	177	6	+	Hordeum vulgare	cis-acting element involved in low-temperature responsiveness
HORVU.MOREX.r3.1HG0066390.1	LTR	CCGAAA	310	6	-	Hordeum vulgare	cis-acting element involved in low-temperature responsiveness
HORVU.MOREX.r3.1HG0066390.1	LTR	CCGAAA	1365	6	+	Hordeum vulgare	cis-acting element involved in low-temperature responsiveness
HORVU.MOREX.r3.1HG0066390.1	WUN-motif	TTATTACAT	123	9	-	Nicotiana glutinosa
HORVU.MOREX.r3.1HG0066390.1	STRE	AGGGG	261	5	-	Arabidopsis thaliana
HORVU.MOREX.r3.1HG0066390.1	STRE	AGGGG	1179	5	-	Arabidopsis thaliana
HORVU.MOREX.r3.1HG0066390.1	STRE	AGGGG	1596	5	-	Arabidopsis thaliana
HORVU.MOREX.r3.1HG0066390.1	STRE	AGGGG	1680	5	+	Arabidopsis thaliana
HORVU.MOREX.r3.1HG0066390.1	STRE	AGGGG	1734	5	+	Arabidopsis thaliana
HORVU.MOREX.r3.1HG0066390.1	STRE	AGGGG	1848	5	-	Arabidopsis thaliana
HORVU.MOREX.r3.1HG0066390.1	Unnamed__1	CGTGG	1196	5	-	Zea mays
HORVU.MOREX.r3.1HG0066390.1	AT~TATA-box	TATATA	753	6	+	Arabidopsis thaliana
HORVU.MOREX.r3.1HG0066390.1	Unnamed__2	CCCCGG	1998	6	-	Zea mays
HORVU.MOREX.r3.1HG0066390.1	TCA-element	CCATCTTTTT	1728	9	-	Nicotiana tabacum	cis-acting element involved in salicylic acid responsiveness
HORVU.MOREX.r3.1HG0066390.1	MYB	TAACCA	787	6	+	Arabidopsis thaliana
HORVU.MOREX.r3.1HG0066390.1	MYB	CAACCA	916	6	+	Arabidopsis thaliana
HORVU.MOREX.r3.1HG0066390.1	MYB	CAACCA	1526	6	+	Arabidopsis thaliana
HORVU.MOREX.r3.1HG0066390.1	ERE	ATTTCATA	669	8	-	Nicotiana glutinos
HORVU.MOREX.r3.1HG0066390.1	A-box	CCGTCC	1061	6	+	Petroselinum crispum	cis-acting regulatory element
HORVU.MOREX.r3.1HG0066390.1	A-box	CCGTCC	1072	6	+	Petroselinum crispum	cis-acting regulatory element
HORVU.MOREX.r3.1HG0069820.1		motif_sequence	143	4	+	organism	short_function
HORVU.MOREX.r3.1HG0069820.1		motif_sequence	197	4	-	organism	short_function
HORVU.MOREX.r3.1HG0069820.1		motif_sequence	227	4	-	organism	short_function
HORVU.MOREX.r3.1HG0069820.1		motif_sequence	322	4	-	organism	short_function
HORVU.MOREX.r3.1HG0069820.1		motif_sequence	330	4	-	organism	short_function
HORVU.MOREX.r3.1HG0069820.1		motif_sequence	631	4	-	organism	short_function
HORVU.MOREX.r3.1HG0069820.1		motif_sequence	714	4	+	organism	short_function
HORVU.MOREX.r3.1HG0069820.1		motif_sequence	858	4	-	organism	short_function
HORVU.MOREX.r3.1HG0069820.1		motif_sequence	864	4	+	organism	short_function
HORVU.MOREX.r3.1HG0069820.1		motif_sequence	880	4	+	organism	short_function
HORVU.MOREX.r3.1HG0069820.1		motif_sequence	951	4	+	organism	short_function
HORVU.MOREX.r3.1HG0069820.1		motif_sequence	1007	4	-	organism	short_function
HORVU.MOREX.r3.1HG0069820.1		motif_sequence	1115	4	-	organism	short_function
HORVU.MOREX.r3.1HG0069820.1		motif_sequence	1320	4	+	organism	short_function
HORVU.MOREX.r3.1HG0069820.1		motif_sequence	1518	4	+	organism	short_function
HORVU.MOREX.r3.1HG0069820.1		motif_sequence	1555	4	-	organism	short_function
HORVU.MOREX.r3.1HG0069820.1		motif_sequence	1604	4	-	organism	short_function
HORVU.MOREX.r3.1HG0069820.1		motif_sequence	1754	4	-	organism	short_function
HORVU.MOREX.r3.1HG0069820.1		motif_sequence	1851	4	-	organism	short_function
HORVU.MOREX.r3.1HG0069820.1	GARE-motif	TCTGTTG	87	7	-	Brassica oleracea	gibberellin-responsive element
HORVU.MOREX.r3.1HG0069820.1	GARE-motif	TCTGTTG	1955	7	+	Brassica oleracea	gibberellin-responsive element
HORVU.MOREX.r3.1HG0069820.1	ABRE3a	TACGTG	453	6	+	Zea mays
HORVU.MOREX.r3.1HG0069820.1	ABRE3a	TACGTG	1613	6	+	Zea mays
HORVU.MOREX.r3.1HG0069820.1	CAAT-box	CAAT	173	4	+	Nicotiana glutinosa
HORVU.MOREX.r3.1HG0069820.1	CAAT-box	CAAAT	175	5	-	Pisum sativum	common cis-acting element in promoter and enhancer regions
HORVU.MOREX.r3.1HG0069820.1	CAAT-box	TGCCAAC	373	7	+	Petunia hybrida	common cis-acting element in promoter and enhancer regions
HORVU.MOREX.r3.1HG0069820.1	CAAT-box	CAAT	595	4	+	Nicotiana glutinosa
HORVU.MOREX.r3.1HG0069820.1	CAAT-box	CAAAT	801	5	+	Pisum sativum	common cis-acting element in promoter and enhancer regions
HORVU.MOREX.r3.1HG0069820.1	CAAT-box	CCAAT	992	5	+	Arabidopsis thaliana	common cis-acting element in promoter and enhancer regions
HORVU.MOREX.r3.1HG0069820.1	CAAT-box	CAAT	993	4	+	Nicotiana glutinosa
HORVU.MOREX.r3.1HG0069820.1	CAAT-box	CAACCAACTCC	1177	10	-	Arabidopsis thaliana	common cis-acting element in promoter and enhancer regions
HORVU.MOREX.r3.1HG0069820.1	CAAT-box	CCAAT	1180	5	-	Arabidopsis thaliana	common cis-acting element in promoter and enhancer regions
HORVU.MOREX.r3.1HG0069820.1	CAAT-box	CAAAT	1200	5	-	Pisum sativum	common cis-acting element in promoter and enhancer regions
HORVU.MOREX.r3.1HG0069820.1	CAAT-box	CAAAT	1253	5	-	Pisum sativum	common cis-acting element in promoter and enhancer regions
HORVU.MOREX.r3.1HG0069820.1	CAAT-box	CAAT	1310	4	-	Nicotiana glutinosa
HORVU.MOREX.r3.1HG0069820.1	CAAT-box	CAAAT	1340	5	+	Pisum sativum	common cis-acting element in promoter and enhancer regions
HORVU.MOREX.r3.1HG0069820.1	CAAT-box	CAAT	1528	4	-	Nicotiana glutinosa
HORVU.MOREX.r3.1HG0069820.1	CAAT-box	CAAT	1643	4	-	Nicotiana glutinosa
HORVU.MOREX.r3.1HG0069820.1	CAAT-box	CAAT	1696	4	+	Nicotiana glutinosa
HORVU.MOREX.r3.1HG0069820.1	CAAT-box	CAAT	1823	4	-	Nicotiana glutinosa
HORVU.MOREX.r3.1HG0069820.1	CAAT-box	CAAT	1834	4	+	Nicotiana glutinosa
HORVU.MOREX.r3.1HG0069820.1	CAAT-box	CCCAATTT	1840	8	-	Arabidopsis thaliana	common cis-acting element in promoter and enhancer regions
HORVU.MOREX.r3.1HG0069820.1	CAAT-box	CCAAT	1842	5	-	Arabidopsis thaliana	common cis-acting element in promoter and enhancer regions
HORVU.MOREX.r3.1HG0069820.1	CAAT-box	CAAT	1994	4	+	Nicotiana glutinosa
HORVU.MOREX.r3.1HG0069820.1	HD-Zip 3	GTAAT(G/C)ATTAC	1526	9.5	-	Arabidopsis thaliana	protein binding site
HORVU.MOREX.r3.1HG0069820.1	WRE3	CCACCT	503	6	+	Pisum sativum
HORVU.MOREX.r3.1HG0069820.1	WRE3	CCACCT	1087	6	+	Pisum sativum
HORVU.MOREX.r3.1HG0069820.1	WRE3	CCACCT	1758	6	-	Pisum sativum
HORVU.MOREX.r3.1HG0069820.1	G-box	TACGTG	453	6	+	Arabidopsis thaliana	cis-acting regulatory element involved in light responsiveness
HORVU.MOREX.r3.1HG0069820.1	G-box	CACGTG	825	6	+	Arabidopsis thaliana	cis-acting regulatory element involved in light responsiveness
HORVU.MOREX.r3.1HG0069820.1	G-box	CACGTC	1423	6	-	Zea mays	cis-acting regulatory element involved in light responsiveness
HORVU.MOREX.r3.1HG0069820.1	G-box	CACGAC	1597	6	-	Zea mays	cis-acting regulatory element involved in light responsiveness
HORVU.MOREX.r3.1HG0069820.1	G-box	TAACACGTAG	1612	9	-	Brassica oleracea	cis-acting regulatory element involved in light responsiveness
HORVU.MOREX.r3.1HG0069820.1	G-box	TACGTG	1613	6	+	Arabidopsis thaliana	cis-acting regulatory element involved in light responsiveness
HORVU.MOREX.r3.1HG0069820.1	TATA-box	TATA	622	4	+	Arabidopsis thaliana	core promoter element around -30 of transcription start
HORVU.MOREX.r3.1HG0069820.1	TATA-box	TATACA	648	6	-	Helianthus annuus	core promoter element around -30 of transcription start
HORVU.MOREX.r3.1HG0069820.1	TATA-box	TATA	650	4	+	Arabidopsis thaliana	core promoter element around -30 of transcription start
HORVU.MOREX.r3.1HG0069820.1	TATA-box	TATAA	1619	5	-	Arabidopsis thaliana	core promoter element around -30 of transcription start
HORVU.MOREX.r3.1HG0069820.1	TATA-box	TATA	1620	4	-	Arabidopsis thaliana	core promoter element around -30 of transcription start
HORVU.MOREX.r3.1HG0069820.1	TATA-box	TATAA	1946	5	-	Arabidopsis thaliana	core promoter element around -30 of transcription start
HORVU.MOREX.r3.1HG0069820.1	TATA-box	TATA	1947	4	-	Arabidopsis thaliana	core promoter element around -30 of transcription start
HORVU.MOREX.r3.1HG0069820.1	MYB-like sequence	TAACCA	1930	6	-	Arabidopsis thaliana
HORVU.MOREX.r3.1HG0069820.1	CGTCA-motif	CGTCA	561	5	-	Hordeum vulgare	cis-acting regulatory element involved in the MeJA-responsiveness
HORVU.MOREX.r3.1HG0069820.1	CGTCA-motif	CGTCA	1382	5	+	Hordeum vulgare	cis-acting regulatory element involved in the MeJA-responsiveness
HORVU.MOREX.r3.1HG0069820.1	CCGTCC-box	CCGTCC	433	6	-	Petroselinum hortense
HORVU.MOREX.r3.1HG0069820.1	CCGTCC-box	CCGTCC	891	6	+	Petroselinum hortense
HORVU.MOREX.r3.1HG0069820.1	CCGTCC-box	CCGTCC	1238	6	-	Petroselinum hortense
HORVU.MOREX.r3.1HG0069820.1	DRE core	GCCGAC	66	6	-	Arabidopsis thaliana
HORVU.MOREX.r3.1HG0069820.1	TGACG-motif	TGACG	561	5	+	Hordeum vulgare	cis-acting regulatory element involved in the MeJA-responsiveness
HORVU.MOREX.r3.1HG0069820.1	TGACG-motif	TGACG	1382	5	-	Hordeum vulgare	cis-acting regulatory element involved in the MeJA-responsiveness
HORVU.MOREX.r3.1HG0069820.1	ABRE	ACGTG	454	5	+	Arabidopsis thaliana	cis-acting element involved in the abscisic acid responsiveness
HORVU.MOREX.r3.1HG0069820.1	ABRE	CGCACGTGTC	823	9	+	Hordeum vulgare	cis-acting element involved in the abscisic acid responsiveness
HORVU.MOREX.r3.1HG0069820.1	ABRE	CACGTG	825	6	+	Arabidopsis thaliana	cis-acting element involved in the abscisic acid responsiveness
HORVU.MOREX.r3.1HG0069820.1	ABRE	ACGTG	826	5	+	Arabidopsis thaliana	cis-acting element involved in the abscisic acid responsiveness
HORVU.MOREX.r3.1HG0069820.1	ABRE	ACGTG	1424	5	+	Arabidopsis thaliana	cis-acting element involved in the abscisic acid responsiveness
HORVU.MOREX.r3.1HG0069820.1	ABRE	ACGTG	1614	5	+	Arabidopsis thaliana	cis-acting element involved in the abscisic acid responsiveness
HORVU.MOREX.r3.1HG0069820.1	GC-motif	CCCCCG	1498	6	-	Zea mays	enhancer-like element involved in anoxic specific inducibility
HORVU.MOREX.r3.1HG0069820.1	dOCT	CTCGGATC	1162	8	-	Zea mays
HORVU.MOREX.r3.1HG0069820.1	as-1	TGACG	561	5	+	Arabidopsis thaliana
HORVU.MOREX.r3.1HG0069820.1	as-1	TGACG	1382	5	-	Arabidopsis thaliana
HORVU.MOREX.r3.1HG0069820.1	TCA	TCATCTTCAT	1659	9	+	Pisum sativum
HORVU.MOREX.r3.1HG0069820.1	CCGTCC motif	CCGTCC	433	6	-	Nicotiana tabacum
HORVU.MOREX.r3.1HG0069820.1	CCGTCC motif	CCGTCC	891	6	+	Nicotiana tabacum
HORVU.MOREX.r3.1HG0069820.1	CCGTCC motif	CCGTCC	1238	6	-	Nicotiana tabacum
HORVU.MOREX.r3.1HG0069820.1	Unnamed__4	CTCC	28	4	+	Petroselinum hortense
HORVU.MOREX.r3.1HG0069820.1	Unnamed__4	CTCC	179	4	-	Petroselinum hortense
HORVU.MOREX.r3.1HG0069820.1	Unnamed__4	CTCC	210	4	-	Petroselinum hortense
HORVU.MOREX.r3.1HG0069820.1	Unnamed__4	CTCC	227	4	-	Petroselinum hortense
HORVU.MOREX.r3.1HG0069820.1	Unnamed__4	CTCC	264	4	-	Petroselinum hortense
HORVU.MOREX.r3.1HG0069820.1	Unnamed__4	CTCC	322	4	-	Petroselinum hortense
HORVU.MOREX.r3.1HG0069820.1	Unnamed__4	CTCC	330	4	-	Petroselinum hortense
HORVU.MOREX.r3.1HG0069820.1	Unnamed__4	CTCC	426	4	+	Petroselinum hortense
HORVU.MOREX.r3.1HG0069820.1	Unnamed__4	CTCC	716	4	+	Petroselinum hortense
HORVU.MOREX.r3.1HG0069820.1	Unnamed__4	CTCC	834	4	+	Petroselinum hortense
HORVU.MOREX.r3.1HG0069820.1	Unnamed__4	CTCC	858	4	-	Petroselinum hortense
HORVU.MOREX.r3.1HG0069820.1	Unnamed__4	CTCC	866	4	+	Petroselinum hortense
HORVU.MOREX.r3.1HG0069820.1	Unnamed__4	CTCC	882	4	+	Petroselinum hortense
HORVU.MOREX.r3.1HG0069820.1	Unnamed__4	CTCC	887	4	+	Petroselinum hortense
HORVU.MOREX.r3.1HG0069820.1	Unnamed__4	CTCC	912	4	+	Petroselinum hortense
HORVU.MOREX.r3.1HG0069820.1	Unnamed__4	CTCC	930	4	-	Petroselinum hortense
HORVU.MOREX.r3.1HG0069820.1	Unnamed__4	CTCC	953	4	+	Petroselinum hortense
HORVU.MOREX.r3.1HG0069820.1	Unnamed__4	CTCC	1007	4	-	Petroselinum hortense
HORVU.MOREX.r3.1HG0069820.1	Unnamed__4	CTCC	1023	4	-	Petroselinum hortense
HORVU.MOREX.r3.1HG0069820.1	Unnamed__4	CTCC	1061	4	+	Petroselinum hortense
HORVU.MOREX.r3.1HG0069820.1	Unnamed__4	CTCC	1067	4	+	Petroselinum hortense
HORVU.MOREX.r3.1HG0069820.1	Unnamed__4	CTCC	1079	4	+	Petroselinum hortense
HORVU.MOREX.r3.1HG0069820.1	Unnamed__4	CTCC	1174	4	-	Petroselinum hortense
HORVU.MOREX.r3.1HG0069820.1	Unnamed__4	CTCC	1246	4	-	Petroselinum hortense
HORVU.MOREX.r3.1HG0069820.1	Unnamed__4	CTCC	1337	4	+	Petroselinum hortense
HORVU.MOREX.r3.1HG0069820.1	Unnamed__4	CTCC	1502	4	-	Petroselinum hortense
HORVU.MOREX.r3.1HG0069820.1	Unnamed__4	CTCC	1722	4	-	Petroselinum hortense
HORVU.MOREX.r3.1HG0069820.1	Unnamed__4	CTCC	1742	4	-	Petroselinum hortense
HORVU.MOREX.r3.1HG0069820.1	Unnamed__4	CTCC	1846	4	-	Petroselinum hortense
HORVU.MOREX.r3.1HG0069820.1	Myb	TAACTG	1070	6	-	Arabidopsis thaliana
HORVU.MOREX.r3.1HG0069820.1	Sp1	GGGCGG	988	6	-	Oryza sativa	light responsive element
HORVU.MOREX.r3.1HG0069820.1	Sp1	GGGCGG	1015	6	+	Oryza sativa	light responsive element
HORVU.MOREX.r3.1HG0069820.1	Sp1	GGGCGG	1154	6	+	Oryza sativa	light responsive element
HORVU.MOREX.r3.1HG0069820.1	Sp1	GGGCGG	1204	6	+	Oryza sativa	light responsive element
HORVU.MOREX.r3.1HG0069820.1	O2-site	GTTGACGTGA	450	9	+	Zea mays	cis-acting regulatory element involved in zein metabolism regulation
HORVU.MOREX.r3.1HG0069820.1	ARE	AAACCA	240	6	+	Zea mays	cis-acting regulatory element essential for the anaerobic induction
HORVU.MOREX.r3.1HG0069820.1	ARE	AAACCA	1295	6	-	Zea mays	cis-acting regulatory element essential for the anaerobic induction
HORVU.MOREX.r3.1HG0069820.1	I-box	AGATAAGG	324	8	+	Triticum aestivum	part of a light responsive element
HORVU.MOREX.r3.1HG0069820.1	MYC	CATGTG	626	6	-	Arabidopsis thaliana
HORVU.MOREX.r3.1HG0069820.1	MYC	CATTTG	801	6	-	Arabidopsis thaliana
HORVU.MOREX.r3.1HG0069820.1	Myb-binding site	CAACAG	87	6	+	Nicotiana tabacum
HORVU.MOREX.r3.1HG0069820.1	Myb-binding site	CAACAG	1956	6	-	Nicotiana tabacum
HORVU.MOREX.r3.1HG0069820.1	ACE	GACACGTATG	1611	9	-	Petroselinum crispum	cis-acting element involved in light responsiveness
HORVU.MOREX.r3.1HG0069820.1	A-box	CCGTCC	433	6	-	Petroselinum crispum	cis-acting regulatory element
HORVU.MOREX.r3.1HG0069820.1	A-box	CCGTCC	891	6	+	Petroselinum crispum	cis-acting regulatory element
HORVU.MOREX.r3.1HG0069820.1	A-box	CCGTCC	1238	6	-	Petroselinum crispum	cis-acting regulatory element
HORVU.MOREX.r3.1HG0069820.1	MYB	CAACAG	87	6	+	Arabidopsis thaliana
HORVU.MOREX.r3.1HG0069820.1	MYB	CAACCA	1182	6	-	Arabidopsis thaliana
HORVU.MOREX.r3.1HG0069820.1	MYB	CAACCA	1291	6	-	Arabidopsis thaliana
HORVU.MOREX.r3.1HG0069820.1	MYB	TAACCA	1930	6	-	Arabidopsis thaliana
HORVU.MOREX.r3.1HG0069820.1	MYB	CAACAG	1956	6	-	Arabidopsis thaliana
HORVU.MOREX.r3.1HG0069820.1	ABRE4	CACGTA	453	6	-	Zea mays
HORVU.MOREX.r3.1HG0069820.1	ABRE4	CACGTA	1613	6	-	Zea mays
HORVU.MOREX.r3.1HG0069820.1	CARE	CAACTCCC	1741	8	-	Oryza sativa
HORVU.MOREX.r3.1HG0069820.1	G-Box	CACGTG	825	6	+	Pisum sativum	cis-acting regulatory element involved in light responsiveness
HORVU.MOREX.r3.1HG0069820.1	Unnamed__2	CCCCGG	1151	6	-	Zea mays
HORVU.MOREX.r3.1HG0069820.1	Unnamed__1	CGTGG	966	5	-	Zea mays
HORVU.MOREX.r3.1HG0069820.1	Unnamed__1	CGTGG	1233	5	+	Zea mays
HORVU.MOREX.r3.1HG0069820.1	Unnamed__1	CGTGG	1269	5	+	Zea mays
HORVU.MOREX.r3.1HG0069820.1	Unnamed__1	CGTGG	1289	5	+	Zea mays
HORVU.MOREX.r3.1HG0069820.1	Unnamed__1	CGTGG	1425	5	+	Zea mays
HORVU.MOREX.r3.1HG0069820.1	Unnamed__1	CGTGG	1444	5	+	Zea mays
HORVU.MOREX.r3.1HG0069820.1	P-box	CCTTTTG	691	7	-	Oryza sativa	gibberellin-responsive element
HORVU.MOREX.r3.1HG0069820.1	LTR	CCGAAA	1210	6	-	Hordeum vulgare	cis-acting element involved in low-temperature responsiveness
HORVU.MOREX.r3.1HG0069820.1	LTR	CCGAAA	1495	6	-	Hordeum vulgare	cis-acting element involved in low-temperature responsiveness
HORVU.MOREX.r3.1HG0069820.1	STRE	AGGGG	207	5	+	Arabidopsis thaliana
HORVU.MOREX.r3.1HG0069820.1	STRE	AGGGG	513	5	+	Arabidopsis thaliana
HORVU.MOREX.r3.1HG0069820.1	STRE	AGGGG	695	5	+	Arabidopsis thaliana
HORVU.MOREX.r3.1HG0069820.1	STRE	AGGGG	711	5	-	Arabidopsis thaliana
HORVU.MOREX.r3.1HG0069820.1	STRE	AGGGG	838	5	-	Arabidopsis thaliana
HORVU.MOREX.r3.1HG0069820.1	STRE	AGGGG	884	5	-	Arabidopsis thaliana
HORVU.MOREX.r3.1HG0069820.1	STRE	AGGGG	1076	5	-	Arabidopsis thaliana
HORVU.MOREX.r3.1HG0069820.1	STRE	AGGGG	1248	5	+	Arabidopsis thaliana
HORVU.MOREX.r3.1HG0069820.1	STRE	AGGGG	1867	5	+	Arabidopsis thaliana
HORVU.MOREX.r3.1HG0073480.1	Unnamed__1	CGTGG	53	5	-	Zea mays
HORVU.MOREX.r3.1HG0073480.1	Unnamed__1	CGTGG	217	5	-	Zea mays
HORVU.MOREX.r3.1HG0073480.1	Unnamed__1	CGTGG	300	5	-	Zea mays
HORVU.MOREX.r3.1HG0073480.1	Unnamed__1	CGTGG	311	5	-	Zea mays
HORVU.MOREX.r3.1HG0073480.1	Unnamed__1	GCCACGTGGC	560	9	+	Petunia sp.
HORVU.MOREX.r3.1HG0073480.1	Unnamed__1	CGTGG	564	5	+	Zea mays
HORVU.MOREX.r3.1HG0073480.1	Unnamed__1	CGTGG	571	5	+	Zea mays
HORVU.MOREX.r3.1HG0073480.1	Unnamed__1	CGTGG	859	5	-	Zea mays
HORVU.MOREX.r3.1HG0073480.1	Unnamed__1	CGTGG	1134	5	-	Zea mays
HORVU.MOREX.r3.1HG0073480.1	Unnamed__1	CGTGG	1496	5	-	Zea mays
HORVU.MOREX.r3.1HG0073480.1	Unnamed__1	CGTGG	1958	5	+	Zea mays
HORVU.MOREX.r3.1HG0073480.1	Unnamed__1	CGTGG	1993	5	+	Zea mays
HORVU.MOREX.r3.1HG0073480.1	Unnamed__1	CGTGG	2002	5	+	Zea mays
HORVU.MOREX.r3.1HG0073480.1	AC-II	TCACCAACCCCC	272	11	+	Populus tremuloides
HORVU.MOREX.r3.1HG0073480.1	STRE	AGGGG	182	5	+	Arabidopsis thaliana
HORVU.MOREX.r3.1HG0073480.1	STRE	AGGGG	244	5	+	Arabidopsis thaliana
HORVU.MOREX.r3.1HG0073480.1	STRE	AGGGG	432	5	-	Arabidopsis thaliana
HORVU.MOREX.r3.1HG0073480.1	STRE	AGGGG	1304	5	+	Arabidopsis thaliana
HORVU.MOREX.r3.1HG0073480.1	STRE	AGGGG	1517	5	+	Arabidopsis thaliana
HORVU.MOREX.r3.1HG0073480.1	STRE	AGGGG	1575	5	-	Arabidopsis thaliana
HORVU.MOREX.r3.1HG0073480.1	STRE	AGGGG	1652	5	-	Arabidopsis thaliana
HORVU.MOREX.r3.1HG0073480.1	STRE	AGGGG	1716	5	-	Arabidopsis thaliana
HORVU.MOREX.r3.1HG0073480.1	STRE	AGGGG	1758	5	-	Arabidopsis thaliana
HORVU.MOREX.r3.1HG0073480.1	STRE	AGGGG	1775	5	-	Arabidopsis thaliana
HORVU.MOREX.r3.1HG0073480.1	STRE	AGGGG	1884	5	-	Arabidopsis thaliana
HORVU.MOREX.r3.1HG0073480.1	W box	TTGACC	64	6	+	Arabidopsis thaliana
HORVU.MOREX.r3.1HG0073480.1	LTR	CCGAAA	1791	6	-	Hordeum vulgare	cis-acting element involved in low-temperature responsiveness
HORVU.MOREX.r3.1HG0073480.1	TC-rich repeats	ATTCTCTAAC	712	9	+	Nicotiana tabacum	cis-acting element involved in defense and stress responsiveness
HORVU.MOREX.r3.1HG0073480.1	G-Box	CACGTT	562	6	-	Pisum sativum	cis-acting regulatory element involved in light responsiveness
HORVU.MOREX.r3.1HG0073480.1	G-Box	CACGTT	1511	6	-	Pisum sativum	cis-acting regulatory element involved in light responsiveness
HORVU.MOREX.r3.1HG0073480.1	ABRE4	CACGTA	680	6	+	Zea mays
HORVU.MOREX.r3.1HG0073480.1	TCA-element	CCATCTTTTT	744	9	-	Nicotiana tabacum	cis-acting element involved in salicylic acid responsiveness
HORVU.MOREX.r3.1HG0073480.1	TCA-element	CCATCTTTTT	806	9	+	Nicotiana tabacum	cis-acting element involved in salicylic acid responsiveness
HORVU.MOREX.r3.1HG0073480.1	Unnamed__2	CCCCGG	193	6	+	Zea mays
HORVU.MOREX.r3.1HG0073480.1	A-box	CCGTCC	984	6	+	Petroselinum crispum	cis-acting regulatory element
HORVU.MOREX.r3.1HG0073480.1	MYB	TAACCA	214	6	+	Arabidopsis thaliana
HORVU.MOREX.r3.1HG0073480.1	MYB	CAACCA	276	6	+	Arabidopsis thaliana
HORVU.MOREX.r3.1HG0073480.1	MYB	TAACCA	507	6	+	Arabidopsis thaliana
HORVU.MOREX.r3.1HG0073480.1	MYB	CAACAG	1267	6	+	Arabidopsis thaliana
HORVU.MOREX.r3.1HG0073480.1	MYB	CAACCA	1482	6	+	Arabidopsis thaliana
HORVU.MOREX.r3.1HG0073480.1	Myb-binding site	CAACAG	1267	6	+	Nicotiana tabacum
HORVU.MOREX.r3.1HG0073480.1	MYC	CATGTG	653	6	+	Arabidopsis thaliana
HORVU.MOREX.r3.1HG0073480.1	MYC	CATGTG	702	6	+	Arabidopsis thaliana
HORVU.MOREX.r3.1HG0073480.1	MYC	CATTTG	721	6	-	Arabidopsis thaliana
HORVU.MOREX.r3.1HG0073480.1	MYC	CATTTG	1396	6	+	Arabidopsis thaliana
HORVU.MOREX.r3.1HG0073480.1	MYC	CATTTG	1444	6	-	Arabidopsis thaliana
HORVU.MOREX.r3.1HG0073480.1	ARE	AAACCA	686	6	-	Zea mays	cis-acting regulatory element essential for the anaerobic induction
HORVU.MOREX.r3.1HG0073480.1	ARE	AAACCA	787	6	-	Zea mays	cis-acting regulatory element essential for the anaerobic induction
HORVU.MOREX.r3.1HG0073480.1	ARE	AAACCA	1131	6	+	Zea mays	cis-acting regulatory element essential for the anaerobic induction
HORVU.MOREX.r3.1HG0073480.1	ARE	AAACCA	1428	6	+	Zea mays	cis-acting regulatory element essential for the anaerobic induction
HORVU.MOREX.r3.1HG0073480.1	ARE	AAACCA	1493	6	+	Zea mays	cis-acting regulatory element essential for the anaerobic induction
HORVU.MOREX.r3.1HG0073480.1	ARE	AAACCA	1963	6	-	Zea mays	cis-acting regulatory element essential for the anaerobic induction
HORVU.MOREX.r3.1HG0073480.1	MYB recognition site	CCGTTG	61	6	+	Arabidopsis thaliana
HORVU.MOREX.r3.1HG0073480.1	MYB recognition site	CCGTTG	208	6	-	Arabidopsis thaliana
HORVU.MOREX.r3.1HG0073480.1	MYB recognition site	CCGTTG	1603	6	-	Arabidopsis thaliana
HORVU.MOREX.r3.1HG0073480.1	O2-site	GATGACATGG	410	9	-	Zea mays	cis-acting regulatory element involved in zein metabolism regulation
HORVU.MOREX.r3.1HG0073480.1	O2-site	GATGATGTGG	1521	9	+	Zea mays	cis-acting regulatory element involved in zein metabolism regulation
HORVU.MOREX.r3.1HG0073480.1	O2-site	GATGATGTGG	1997	9	+	Zea mays	cis-acting regulatory element involved in zein metabolism regulation
HORVU.MOREX.r3.1HG0073480.1	Sp1	GGGCGG	140	6	+	Oryza sativa	light responsive element
HORVU.MOREX.r3.1HG0073480.1	Sp1	GGGCGG	263	6	-	Oryza sativa	light responsive element
HORVU.MOREX.r3.1HG0073480.1	Sp1	GGGCGG	1811	6	-	Oryza sativa	light responsive element
HORVU.MOREX.r3.1HG0073480.1	Sp1	GGGCGG	1932	6	+	Oryza sativa	light responsive element
HORVU.MOREX.r3.1HG0073480.1	CCGTCC motif	CCGTCC	984	6	+	Nicotiana tabacum
HORVU.MOREX.r3.1HG0073480.1	Unnamed__4	CTCC	88	4	-	Petroselinum hortense
HORVU.MOREX.r3.1HG0073480.1	Unnamed__4	CTCC	419	4	+	Petroselinum hortense
HORVU.MOREX.r3.1HG0073480.1	Unnamed__4	CTCC	461	4	+	Petroselinum hortense
HORVU.MOREX.r3.1HG0073480.1	Unnamed__4	CTCC	469	4	+	Petroselinum hortense
HORVU.MOREX.r3.1HG0073480.1	Unnamed__4	CTCC	496	4	+	Petroselinum hortense
HORVU.MOREX.r3.1HG0073480.1	Unnamed__4	CTCC	908	4	-	Petroselinum hortense
HORVU.MOREX.r3.1HG0073480.1	Unnamed__4	CTCC	1067	4	+	Petroselinum hortense
HORVU.MOREX.r3.1HG0073480.1	Unnamed__4	CTCC	1260	4	-	Petroselinum hortense
HORVU.MOREX.r3.1HG0073480.1	Unnamed__4	CTCC	1547	4	-	Petroselinum hortense
HORVU.MOREX.r3.1HG0073480.1	Unnamed__4	CTCC	1572	4	+	Petroselinum hortense
HORVU.MOREX.r3.1HG0073480.1	Unnamed__4	CTCC	1630	4	+	Petroselinum hortense
HORVU.MOREX.r3.1HG0073480.1	Unnamed__4	CTCC	1661	4	+	Petroselinum hortense
HORVU.MOREX.r3.1HG0073480.1	Unnamed__4	CTCC	1743	4	+	Petroselinum hortense
HORVU.MOREX.r3.1HG0073480.1	Unnamed__4	CTCC	1761	4	+	Petroselinum hortense
HORVU.MOREX.r3.1HG0073480.1	Unnamed__4	CTCC	1765	4	+	Petroselinum hortense
HORVU.MOREX.r3.1HG0073480.1	Unnamed__4	CTCC	1769	4	+	Petroselinum hortense
HORVU.MOREX.r3.1HG0073480.1	Unnamed__4	CTCC	1773	4	+	Petroselinum hortense
HORVU.MOREX.r3.1HG0073480.1	Unnamed__4	CTCC	1809	4	+	Petroselinum hortense
HORVU.MOREX.r3.1HG0073480.1	Unnamed__4	CTCC	1826	4	+	Petroselinum hortense
HORVU.MOREX.r3.1HG0073480.1	as-1	TGACG	44	5	-	Arabidopsis thaliana
HORVU.MOREX.r3.1HG0073480.1	as-1	TGACG	603	5	-	Arabidopsis thaliana
HORVU.MOREX.r3.1HG0073480.1	as-1	TGACG	1146	5	-	Arabidopsis thaliana
HORVU.MOREX.r3.1HG0073480.1	as-1	TGACG	1273	5	+	Arabidopsis thaliana
HORVU.MOREX.r3.1HG0073480.1	as-1	TGACG	1942	5	+	Arabidopsis thaliana
HORVU.MOREX.r3.1HG0073480.1	as-1	TGACG	1999	5	+	Arabidopsis thaliana
HORVU.MOREX.r3.1HG0073480.1	Box 4	ATTAAT	19	6	+	Petroselinum crispum	part of a conserved DNA module involved in light responsiveness
HORVU.MOREX.r3.1HG0073480.1	Box 4	ATTAAT	920	6	+	Petroselinum crispum	part of a conserved DNA module involved in light responsiveness
HORVU.MOREX.r3.1HG0073480.1	box S	AGCCACC	90	7	+	Arabidopsis thaliana
HORVU.MOREX.r3.1HG0073480.1	GC-motif	CCCCCG	346	6	+	Zea mays	enhancer-like element involved in anoxic specific inducibility
HORVU.MOREX.r3.1HG0073480.1	GC-motif	CCCCCG	1836	6	+	Zea mays	enhancer-like element involved in anoxic specific inducibility
HORVU.MOREX.r3.1HG0073480.1	GC-motif	CGCCGCGCA	1974	9	-	Oryza sativa	?
HORVU.MOREX.r3.1HG0073480.1	TGACG-motif	TGACG	44	5	-	Hordeum vulgare	cis-acting regulatory element involved in the MeJA-responsiveness
HORVU.MOREX.r3.1HG0073480.1	TGACG-motif	TGACG	603	5	-	Hordeum vulgare	cis-acting regulatory element involved in the MeJA-responsiveness
HORVU.MOREX.r3.1HG0073480.1	TGACG-motif	TGACG	1146	5	-	Hordeum vulgare	cis-acting regulatory element involved in the MeJA-responsiveness
HORVU.MOREX.r3.1HG0073480.1	TGACG-motif	TGACG	1273	5	+	Hordeum vulgare	cis-acting regulatory element involved in the MeJA-responsiveness
HORVU.MOREX.r3.1HG0073480.1	TGACG-motif	TGACG	1942	5	+	Hordeum vulgare	cis-acting regulatory element involved in the MeJA-responsiveness
HORVU.MOREX.r3.1HG0073480.1	TGACG-motif	TGACG	1999	5	+	Hordeum vulgare	cis-acting regulatory element involved in the MeJA-responsiveness
HORVU.MOREX.r3.1HG0073480.1	Y-box	TGTGGAGGAGCA	1065	11	-	Lemna gibba	?
HORVU.MOREX.r3.1HG0073480.1	ABRE	GCAACGTGTC	560	9	+	Hordeum vulgare	cis-acting element involved in the abscisic acid responsiveness
HORVU.MOREX.r3.1HG0073480.1	ABRE	ACGTG	563	5	+	Arabidopsis thaliana	cis-acting element involved in the abscisic acid responsiveness
HORVU.MOREX.r3.1HG0073480.1	ABRE	CGTACGTGCA	678	9	-	Hordeum vulgare	cis-acting element involved in the abscisic acid responsiveness
HORVU.MOREX.r3.1HG0073480.1	ABRE	ACGTG	680	5	-	Arabidopsis thaliana	cis-acting element involved in the abscisic acid responsiveness
HORVU.MOREX.r3.1HG0073480.1	ABRE	ACGTG	1512	5	+	Arabidopsis thaliana	cis-acting element involved in the abscisic acid responsiveness
HORVU.MOREX.r3.1HG0073480.1	ABRE	GCCGCGTGGC	1696	9	-	Oryza sativa	cis-acting element involved in the abscisic acid responsiveness
HORVU.MOREX.r3.1HG0073480.1	ABRE	ACGTG	2001	5	+	Arabidopsis thaliana	cis-acting element involved in the abscisic acid responsiveness
HORVU.MOREX.r3.1HG0073480.1	CCGTCC-box	CCGTCC	984	6	+	Petroselinum hortense
HORVU.MOREX.r3.1HG0073480.1	GATA-motif	AAGATAAGATT	936	11	+	Arabidopsis thaliana	part of a light responsive element
HORVU.MOREX.r3.1HG0073480.1	GATA-motif	AAGGATAAGG	1588	9	-	Solanum tuberosum	part of a light responsive element
HORVU.MOREX.r3.1HG0073480.1	MYB-like sequence	TAACCA	214	6	+	Arabidopsis thaliana
HORVU.MOREX.r3.1HG0073480.1	MYB-like sequence	TAACCA	507	6	+	Arabidopsis thaliana
HORVU.MOREX.r3.1HG0073480.1	TATA-box	TACAAAA	478	7	-	Oryza sativa	core promoter element around -30 of transcription start
HORVU.MOREX.r3.1HG0073480.1	TATA-box	TACAAAA	826	7	-	Oryza sativa	core promoter element around -30 of transcription start
HORVU.MOREX.r3.1HG0073480.1	TATA-box	TAAAGATT	836	8	-	Arabidopsis thaliana	core promoter element around -30 of transcription start
HORVU.MOREX.r3.1HG0073480.1	TATA-box	ATATAT	844	6	+	Brassica napus	core promoter element around -30 of transcription start
HORVU.MOREX.r3.1HG0073480.1	TATA-box	TATA	845	4	+	Arabidopsis thaliana	core promoter element around -30 of transcription start
HORVU.MOREX.r3.1HG0073480.1	TATA-box	TACAAAA	931	7	+	Oryza sativa	core promoter element around -30 of transcription start
HORVU.MOREX.r3.1HG0073480.1	TATA-box	TACAAAA	1048	7	-	Oryza sativa	core promoter element around -30 of transcription start
HORVU.MOREX.r3.1HG0073480.1	TATA-box	TATAA	1353	5	-	Arabidopsis thaliana	core promoter element around -30 of transcription start
HORVU.MOREX.r3.1HG0073480.1	TATA-box	TATA	1354	4	-	Arabidopsis thaliana	core promoter element around -30 of transcription start
HORVU.MOREX.r3.1HG0073480.1	TATA-box	ATATAA	1362	6	+	Brassica oleracea	core promoter element around -30 of transcription start
HORVU.MOREX.r3.1HG0073480.1	TATA-box	TATA	1363	4	-	Arabidopsis thaliana	core promoter element around -30 of transcription start
HORVU.MOREX.r3.1HG0073480.1	TATA-box	TATACA	1400	6	-	Helianthus annuus	core promoter element around -30 of transcription start
HORVU.MOREX.r3.1HG0073480.1	TATA-box	TATA	1402	4	-	Arabidopsis thaliana	core promoter element around -30 of transcription start
HORVU.MOREX.r3.1HG0073480.1	CGTCA-motif	CGTCA	44	5	+	Hordeum vulgare	cis-acting regulatory element involved in the MeJA-responsiveness
HORVU.MOREX.r3.1HG0073480.1	CGTCA-motif	CGTCA	603	5	+	Hordeum vulgare	cis-acting regulatory element involved in the MeJA-responsiveness
HORVU.MOREX.r3.1HG0073480.1	CGTCA-motif	CGTCA	1146	5	+	Hordeum vulgare	cis-acting regulatory element involved in the MeJA-responsiveness
HORVU.MOREX.r3.1HG0073480.1	CGTCA-motif	CGTCA	1273	5	-	Hordeum vulgare	cis-acting regulatory element involved in the MeJA-responsiveness
HORVU.MOREX.r3.1HG0073480.1	CGTCA-motif	CGTCA	1942	5	-	Hordeum vulgare	cis-acting regulatory element involved in the MeJA-responsiveness
HORVU.MOREX.r3.1HG0073480.1	CGTCA-motif	CGTCA	1999	5	-	Hordeum vulgare	cis-acting regulatory element involved in the MeJA-responsiveness
HORVU.MOREX.r3.1HG0073480.1	WRE3	CCACCT	255	6	-	Pisum sativum
HORVU.MOREX.r3.1HG0073480.1	WRE3	CCACCT	609	6	+	Pisum sativum
HORVU.MOREX.r3.1HG0073480.1	G-box	TACGTG	680	6	-	Arabidopsis thaliana	cis-acting regulatory element involved in light responsiveness
HORVU.MOREX.r3.1HG0073480.1	G-box	CACGTC	2000	6	-	Zea mays	cis-acting regulatory element involved in light responsiveness
HORVU.MOREX.r3.1HG0073480.1	TGA-element	AACGAC	121	6	+	Brassica oleracea	auxin-responsive element
HORVU.MOREX.r3.1HG0073480.1	TGA-element	AACGAC	1308	6	-	Brassica oleracea	auxin-responsive element
HORVU.MOREX.r3.1HG0073480.1	CCAAT-box	CAACGG	61	6	-	Hordeum vulgare	MYBHv1 binding site
HORVU.MOREX.r3.1HG0073480.1	CCAAT-box	CAACGG	208	6	+	Hordeum vulgare	MYBHv1 binding site
HORVU.MOREX.r3.1HG0073480.1	CCAAT-box	CAACGG	1603	6	+	Hordeum vulgare	MYBHv1 binding site
HORVU.MOREX.r3.1HG0073480.1		motif_sequence	417	4	+	organism	short_function
HORVU.MOREX.r3.1HG0073480.1		motif_sequence	756	4	-	organism	short_function
HORVU.MOREX.r3.1HG0073480.1		motif_sequence	760	4	+	organism	short_function
HORVU.MOREX.r3.1HG0073480.1		motif_sequence	1104	4	+	organism	short_function
HORVU.MOREX.r3.1HG0073480.1		motif_sequence	1209	4	-	organism	short_function
HORVU.MOREX.r3.1HG0073480.1		motif_sequence	1410	4	+	organism	short_function
HORVU.MOREX.r3.1HG0073480.1		motif_sequence	1704	4	-	organism	short_function
HORVU.MOREX.r3.1HG0073480.1	CAAT-box	CAAAT	484	5	-	Pisum sativum	common cis-acting element in promoter and enhancer regions
HORVU.MOREX.r3.1HG0073480.1	CAAT-box	CAAT	545	4	+	Nicotiana glutinosa
HORVU.MOREX.r3.1HG0073480.1	CAAT-box	CAAAT	721	5	+	Pisum sativum	common cis-acting element in promoter and enhancer regions
HORVU.MOREX.r3.1HG0073480.1	CAAT-box	CAAT	767	4	-	Nicotiana glutinosa
HORVU.MOREX.r3.1HG0073480.1	CAAT-box	CAAAT	816	5	-	Pisum sativum	common cis-acting element in promoter and enhancer regions
HORVU.MOREX.r3.1HG0073480.1	CAAT-box	CAAAT	834	5	+	Pisum sativum	common cis-acting element in promoter and enhancer regions
HORVU.MOREX.r3.1HG0073480.1	CAAT-box	CAAT	912	4	+	Nicotiana glutinosa
HORVU.MOREX.r3.1HG0073480.1	CAAT-box	CAAT	918	4	+	Nicotiana glutinosa
HORVU.MOREX.r3.1HG0073480.1	CAAT-box	CAAT	965	4	+	Nicotiana glutinosa
HORVU.MOREX.r3.1HG0073480.1	CAAT-box	CAAAT	1033	5	-	Pisum sativum	common cis-acting element in promoter and enhancer regions
HORVU.MOREX.r3.1HG0073480.1	CAAT-box	CAAAT	1397	5	-	Pisum sativum	common cis-acting element in promoter and enhancer regions
HORVU.MOREX.r3.1HG0073480.1	CAAT-box	CAAT	1405	4	-	Nicotiana glutinosa
HORVU.MOREX.r3.1HG0073480.1	CAAT-box	CAAAT	1444	5	+	Pisum sativum	common cis-acting element in promoter and enhancer regions
HORVU.MOREX.r3.1HG0073480.1	ABRE3a	TACGTG	680	6	-	Zea mays
HORVU.MOREX.r3.1HG0075320.1	CCGTCC-box	CCGTCC	1221	6	-	Petroselinum hortense
HORVU.MOREX.r3.1HG0075320.1	GATA-motif	AAGGATAAGG	365	9	-	Solanum tuberosum	part of a light responsive element
HORVU.MOREX.r3.1HG0075320.1	TGACG-motif	TGACG	1203	5	-	Hordeum vulgare	cis-acting regulatory element involved in the MeJA-responsiveness
HORVU.MOREX.r3.1HG0075320.1	TGACG-motif	TGACG	1434	5	+	Hordeum vulgare	cis-acting regulatory element involved in the MeJA-responsiveness
HORVU.MOREX.r3.1HG0075320.1	ABRE	ACGTG	168	5	-	Arabidopsis thaliana	cis-acting element involved in the abscisic acid responsiveness
HORVU.MOREX.r3.1HG0075320.1	ABRE	CGCACGTGTC	247	9	+	Hordeum vulgare	cis-acting element involved in the abscisic acid responsiveness
HORVU.MOREX.r3.1HG0075320.1	ABRE	CACGTG	249	6	+	Arabidopsis thaliana	cis-acting element involved in the abscisic acid responsiveness
HORVU.MOREX.r3.1HG0075320.1	ABRE	ACGTG	250	5	+	Arabidopsis thaliana	cis-acting element involved in the abscisic acid responsiveness
HORVU.MOREX.r3.1HG0075320.1	ABRE	GCAACGTGTC	520	9	-	Hordeum vulgare	cis-acting element involved in the abscisic acid responsiveness
HORVU.MOREX.r3.1HG0075320.1	ABRE	GACACGTACGT	781	10	+	Oryza sativa	cis-acting element involved in the abscisic acid responsiveness
HORVU.MOREX.r3.1HG0075320.1	ABRE	CGTACGTGCA	785	9	+	Hordeum vulgare	cis-acting element involved in the abscisic acid responsiveness
HORVU.MOREX.r3.1HG0075320.1	ABRE	ACGTG	788	5	+	Arabidopsis thaliana	cis-acting element involved in the abscisic acid responsiveness
HORVU.MOREX.r3.1HG0075320.1	ABRE	GCCGCGTGGC	1085	9	-	Oryza sativa	cis-acting element involved in the abscisic acid responsiveness
HORVU.MOREX.r3.1HG0075320.1	ABRE	ACGTG	1201	5	-	Arabidopsis thaliana	cis-acting element involved in the abscisic acid responsiveness
HORVU.MOREX.r3.1HG0075320.1	ABRE	ACGTG	1436	5	+	Arabidopsis thaliana	cis-acting element involved in the abscisic acid responsiveness
HORVU.MOREX.r3.1HG0075320.1	ABRE	ACGTG	1730	5	+	Arabidopsis thaliana	cis-acting element involved in the abscisic acid responsiveness
HORVU.MOREX.r3.1HG0075320.1	CAG-motif	GAAAGGCAGAC	1532	10	-	Arabidopsis thaliana	part of a light response element
HORVU.MOREX.r3.1HG0075320.1	dOCT	CTCGGATC	1114	8	-	Zea mays
HORVU.MOREX.r3.1HG0075320.1	dOCT	CACGGATC	1287	8	-	Zea mays
HORVU.MOREX.r3.1HG0075320.1	as-1	TGACG	1203	5	-	Arabidopsis thaliana
HORVU.MOREX.r3.1HG0075320.1	as-1	TGACG	1434	5	+	Arabidopsis thaliana
HORVU.MOREX.r3.1HG0075320.1		motif_sequence	292	4	-	organism	short_function
HORVU.MOREX.r3.1HG0075320.1		motif_sequence	343	4	+	organism	short_function
HORVU.MOREX.r3.1HG0075320.1		motif_sequence	474	4	+	organism	short_function
HORVU.MOREX.r3.1HG0075320.1		motif_sequence	722	4	+	organism	short_function
HORVU.MOREX.r3.1HG0075320.1		motif_sequence	736	4	+	organism	short_function
HORVU.MOREX.r3.1HG0075320.1		motif_sequence	741	4	+	organism	short_function
HORVU.MOREX.r3.1HG0075320.1		motif_sequence	784	4	+	organism	short_function
HORVU.MOREX.r3.1HG0075320.1		motif_sequence	908	4	-	organism	short_function
HORVU.MOREX.r3.1HG0075320.1		motif_sequence	1385	4	-	organism	short_function
HORVU.MOREX.r3.1HG0075320.1		motif_sequence	1504	4	+	organism	short_function
HORVU.MOREX.r3.1HG0075320.1		motif_sequence	1617	4	-	organism	short_function
HORVU.MOREX.r3.1HG0075320.1		motif_sequence	1692	4	+	organism	short_function
HORVU.MOREX.r3.1HG0075320.1		motif_sequence	1942	4	+	organism	short_function
HORVU.MOREX.r3.1HG0075320.1	CCAAT-box	CAACGG	758	6	+	Hordeum vulgare	MYBHv1 binding site
HORVU.MOREX.r3.1HG0075320.1	ABRE3a	TACGTG	787	6	+	Zea mays
HORVU.MOREX.r3.1HG0075320.1	ABRE3a	TACGTG	1729	6	+	Zea mays
HORVU.MOREX.r3.1HG0075320.1	CAAT-box	CAAT	26	4	-	Nicotiana glutinosa
HORVU.MOREX.r3.1HG0075320.1	CAAT-box	CAAT	60	4	+	Nicotiana glutinosa
HORVU.MOREX.r3.1HG0075320.1	CAAT-box	CAAT	65	4	+	Nicotiana glutinosa
HORVU.MOREX.r3.1HG0075320.1	CAAT-box	CAAAT	67	5	-	Pisum sativum	common cis-acting element in promoter and enhancer regions
HORVU.MOREX.r3.1HG0075320.1	CAAT-box	CAAAT	287	5	-	Pisum sativum	common cis-acting element in promoter and enhancer regions
HORVU.MOREX.r3.1HG0075320.1	CAAT-box	CAAAT	320	5	-	Pisum sativum	common cis-acting element in promoter and enhancer regions
HORVU.MOREX.r3.1HG0075320.1	CAAT-box	CAAAT	406	5	-	Pisum sativum	common cis-acting element in promoter and enhancer regions
HORVU.MOREX.r3.1HG0075320.1	CAAT-box	CAAT	712	4	+	Nicotiana glutinosa
HORVU.MOREX.r3.1HG0075320.1	CAAT-box	CAAAT	752	5	-	Pisum sativum	common cis-acting element in promoter and enhancer regions
HORVU.MOREX.r3.1HG0075320.1	CAAT-box	TGCCAAC	755	7	+	Petunia hybrida	common cis-acting element in promoter and enhancer regions
HORVU.MOREX.r3.1HG0075320.1	CAAT-box	CCAAT	875	5	+	Arabidopsis thaliana	common cis-acting element in promoter and enhancer regions
HORVU.MOREX.r3.1HG0075320.1	CAAT-box	CAAT	876	4	+	Nicotiana glutinosa
HORVU.MOREX.r3.1HG0075320.1	CAAT-box	CAAT	1238	4	-	Nicotiana glutinosa
HORVU.MOREX.r3.1HG0075320.1	CAAT-box	CAAT	1432	4	-	Nicotiana glutinosa
HORVU.MOREX.r3.1HG0075320.1	CAAT-box	CAAT	1521	4	+	Nicotiana glutinosa
HORVU.MOREX.r3.1HG0075320.1	CAAT-box	CAAT	1861	4	+	Nicotiana glutinosa
HORVU.MOREX.r3.1HG0075320.1	G-box	CACGTC	168	6	+	Zea mays	cis-acting regulatory element involved in light responsiveness
HORVU.MOREX.r3.1HG0075320.1	G-box	CACGTG	249	6	+	Arabidopsis thaliana	cis-acting regulatory element involved in light responsiveness
HORVU.MOREX.r3.1HG0075320.1	G-box	CACGAC	535	6	+	Zea mays	cis-acting regulatory element involved in light responsiveness
HORVU.MOREX.r3.1HG0075320.1	G-box	TACGTG	787	6	+	Arabidopsis thaliana	cis-acting regulatory element involved in light responsiveness
HORVU.MOREX.r3.1HG0075320.1	G-box	CACGAC	829	6	-	Zea mays	cis-acting regulatory element involved in light responsiveness
HORVU.MOREX.r3.1HG0075320.1	G-box	CACGAC	870	6	+	Zea mays	cis-acting regulatory element involved in light responsiveness
HORVU.MOREX.r3.1HG0075320.1	G-box	CACGAC	964	6	+	Zea mays	cis-acting regulatory element involved in light responsiveness
HORVU.MOREX.r3.1HG0075320.1	G-box	CACGTC	1201	6	+	Zea mays	cis-acting regulatory element involved in light responsiveness
HORVU.MOREX.r3.1HG0075320.1	G-box	CACGTC	1435	6	-	Zea mays	cis-acting regulatory element involved in light responsiveness
HORVU.MOREX.r3.1HG0075320.1	G-box	TACGTG	1729	6	+	Arabidopsis thaliana	cis-acting regulatory element involved in light responsiveness
HORVU.MOREX.r3.1HG0075320.1	MYB-like sequence	TAACCA	1183	6	+	Arabidopsis thaliana
HORVU.MOREX.r3.1HG0075320.1	TATA-box	TATAAAT	82	7	-	Brassica juncea	core promoter element around -30 of transcription start
HORVU.MOREX.r3.1HG0075320.1	TATA-box	TATAAA	83	6	-	Helianthus annuus	core promoter element around -30 of transcription start
HORVU.MOREX.r3.1HG0075320.1	TATA-box	TATAA	84	5	-	Arabidopsis thaliana	core promoter element around -30 of transcription start
HORVU.MOREX.r3.1HG0075320.1	TATA-box	TATA	85	4	+	Arabidopsis thaliana	core promoter element around -30 of transcription start
HORVU.MOREX.r3.1HG0075320.1	TATA-box	ccTATAAAaa	96	9	+	Arabidopsis thaliana	core promoter element around -30 of transcription start
HORVU.MOREX.r3.1HG0075320.1	TATA-box	TATA	98	4	+	Arabidopsis thaliana	core promoter element around -30 of transcription start
HORVU.MOREX.r3.1HG0075320.1	TATA-box	ATATAT	420	6	+	Brassica napus	core promoter element around -30 of transcription start
HORVU.MOREX.r3.1HG0075320.1	TATA-box	TATA	421	4	+	Arabidopsis thaliana	core promoter element around -30 of transcription start
HORVU.MOREX.r3.1HG0075320.1	TATA-box	ATATAT	1921	6	-	Brassica napus	core promoter element around -30 of transcription start
HORVU.MOREX.r3.1HG0075320.1	TATA-box	TATATA	1922	6	-	Arabidopsis thaliana	core promoter element around -30 of transcription start
HORVU.MOREX.r3.1HG0075320.1	TATA-box	TATA	1924	4	-	Arabidopsis thaliana	core promoter element around -30 of transcription start
HORVU.MOREX.r3.1HG0075320.1	CGTCA-motif	CGTCA	1203	5	+	Hordeum vulgare	cis-acting regulatory element involved in the MeJA-responsiveness
HORVU.MOREX.r3.1HG0075320.1	CGTCA-motif	CGTCA	1434	5	-	Hordeum vulgare	cis-acting regulatory element involved in the MeJA-responsiveness
HORVU.MOREX.r3.1HG0075320.1	ERE	ATTTTAAA	1664	8	-	Nicotiana glutinos
HORVU.MOREX.r3.1HG0075320.1	A-box	CCGTCC	1221	6	-	Petroselinum crispum	cis-acting regulatory element
HORVU.MOREX.r3.1HG0075320.1	MYB	CAACCA	70	6	-	Arabidopsis thaliana
HORVU.MOREX.r3.1HG0075320.1	MYB	CAACAG	269	6	+	Arabidopsis thaliana
HORVU.MOREX.r3.1HG0075320.1	MYB	TAACCA	1183	6	+	Arabidopsis thaliana
HORVU.MOREX.r3.1HG0075320.1	MYB	CAACAG	1352	6	+	Arabidopsis thaliana
HORVU.MOREX.r3.1HG0075320.1	MYB	CAACCA	1368	6	-	Arabidopsis thaliana
HORVU.MOREX.r3.1HG0075320.1	MYB	CAACCA	1809	6	+	Arabidopsis thaliana
HORVU.MOREX.r3.1HG0075320.1	MYB	CAACCA	1891	6	+	Arabidopsis thaliana
HORVU.MOREX.r3.1HG0075320.1	CAT-box	GCCACT	466	6	+	Arabidopsis thaliana	cis-acting regulatory element related to meristem expression
HORVU.MOREX.r3.1HG0075320.1	TCA-element	CCATCTTTTT	687	9	+	Nicotiana tabacum	cis-acting element involved in salicylic acid responsiveness
HORVU.MOREX.r3.1HG0075320.1	ABRE4	CACGTA	787	6	-	Zea mays
HORVU.MOREX.r3.1HG0075320.1	ABRE4	CACGTA	1729	6	-	Zea mays
HORVU.MOREX.r3.1HG0075320.1	G-Box	CACGTG	249	6	+	Pisum sativum	cis-acting regulatory element involved in light responsiveness
HORVU.MOREX.r3.1HG0075320.1	Unnamed__2	CCCCGG	655	6	-	Zea mays
HORVU.MOREX.r3.1HG0075320.1	Unnamed__2	CCCCGG	699	6	+	Zea mays
HORVU.MOREX.r3.1HG0075320.1	Unnamed__2	CCCCGG	993	6	-	Zea mays
HORVU.MOREX.r3.1HG0075320.1	re2f-1	GCGGGAAA	356	8	+	Oryza sativa
HORVU.MOREX.r3.1HG0075320.1	AT~TATA-box	TATATA	1922	6	-	Arabidopsis thaliana
HORVU.MOREX.r3.1HG0075320.1	Unnamed__1	CGTGG	592	5	-	Zea mays
HORVU.MOREX.r3.1HG0075320.1	Unnamed__1	CGTGG	599	5	-	Zea mays
HORVU.MOREX.r3.1HG0075320.1	Unnamed__1	CGTGG	606	5	-	Zea mays
HORVU.MOREX.r3.1HG0075320.1	Unnamed__1	CGTGG	1437	5	+	Zea mays
HORVU.MOREX.r3.1HG0075320.1	W box	TTGACC	1073	6	+	Arabidopsis thaliana
HORVU.MOREX.r3.1HG0075320.1	P-box	CCTTTTG	1467	7	+	Oryza sativa	gibberellin-responsive element
HORVU.MOREX.r3.1HG0075320.1	STRE	AGGGG	1051	5	+	Arabidopsis thaliana
HORVU.MOREX.r3.1HG0075320.1	STRE	AGGGG	1356	5	+	Arabidopsis thaliana
HORVU.MOREX.r3.1HG0075320.1	STRE	AGGGG	1407	5	-	Arabidopsis thaliana
HORVU.MOREX.r3.1HG0075320.1	CCGTCC motif	CCGTCC	1221	6	-	Nicotiana tabacum
HORVU.MOREX.r3.1HG0075320.1	Unnamed__4	CTCC	112	4	-	Petroselinum hortense
HORVU.MOREX.r3.1HG0075320.1	Unnamed__4	CTCC	514	4	-	Petroselinum hortense
HORVU.MOREX.r3.1HG0075320.1	Unnamed__4	CTCC	575	4	+	Petroselinum hortense
HORVU.MOREX.r3.1HG0075320.1	Unnamed__4	CTCC	727	4	+	Petroselinum hortense
HORVU.MOREX.r3.1HG0075320.1	Unnamed__4	CTCC	838	4	+	Petroselinum hortense
HORVU.MOREX.r3.1HG0075320.1	Unnamed__4	CTCC	955	4	+	Petroselinum hortense
HORVU.MOREX.r3.1HG0075320.1	Unnamed__4	CTCC	1054	4	-	Petroselinum hortense
HORVU.MOREX.r3.1HG0075320.1	Unnamed__4	CTCC	1225	4	-	Petroselinum hortense
HORVU.MOREX.r3.1HG0075320.1	Unnamed__4	CTCC	1385	4	-	Petroselinum hortense
HORVU.MOREX.r3.1HG0075320.1	Unnamed__4	CTCC	1424	4	+	Petroselinum hortense
HORVU.MOREX.r3.1HG0075320.1	Unnamed__4	CTCC	1444	4	-	Petroselinum hortense
HORVU.MOREX.r3.1HG0075320.1	Unnamed__4	CTCC	1608	4	-	Petroselinum hortense
HORVU.MOREX.r3.1HG0075320.1	Unnamed__4	CTCC	1772	4	+	Petroselinum hortense
HORVU.MOREX.r3.1HG0075320.1	Unnamed__4	CTCC	1795	4	+	Petroselinum hortense
HORVU.MOREX.r3.1HG0075320.1	Unnamed__4	CTCC	1845	4	+	Petroselinum hortense
HORVU.MOREX.r3.1HG0075320.1	Unnamed__4	CTCC	1871	4	-	Petroselinum hortense
HORVU.MOREX.r3.1HG0075320.1	Unnamed__4	CTCC	1931	4	+	Petroselinum hortense
HORVU.MOREX.r3.1HG0075320.1	Unnamed__4	CTCC	1937	4	+	Petroselinum hortense
HORVU.MOREX.r3.1HG0075320.1	Unnamed__4	CTCC	1987	4	-	Petroselinum hortense
HORVU.MOREX.r3.1HG0075320.1	Unnamed__4	CTCC	1990	4	-	Petroselinum hortense
HORVU.MOREX.r3.1HG0075320.1	AC-I	(T/C)C(T/C)(C/T)ACC(T/C)ACC	172	8.5	+	Phaseolus vulgaris
HORVU.MOREX.r3.1HG0075320.1	Sp1	GGGCGG	1748	6	+	Oryza sativa	light responsive element
HORVU.MOREX.r3.1HG0075320.1	Sp1	GGGCGG	1797	6	-	Oryza sativa	light responsive element
HORVU.MOREX.r3.1HG0075320.1	Sp1	GGGCGG	1802	6	-	Oryza sativa	light responsive element
HORVU.MOREX.r3.1HG0075320.1	MYB recognition site	CCGTTG	758	6	-	Arabidopsis thaliana
HORVU.MOREX.r3.1HG0075320.1	MYC	CATTTG	405	6	+	Arabidopsis thaliana
HORVU.MOREX.r3.1HG0075320.1	MYC	CATTTG	751	6	+	Arabidopsis thaliana
HORVU.MOREX.r3.1HG0075320.1	Myb-binding site	CAACAG	269	6	+	Nicotiana tabacum
HORVU.MOREX.r3.1HG0075320.1	Myb-binding site	CAACAG	1352	6	+	Nicotiana tabacum
HORVU.MOREX.r3.1HG0075320.1	ACE	GCGACGTACC	970	10	-	Petroselinum crispum	cis-acting element involved in light responsiveness
HORVU.MOREX.r3.1HG0079700.1	AT~ABRE	TACGTGTC	1735	8	-	Arabidopsis thaliana
HORVU.MOREX.r3.1HG0079700.1	WRE3	CCACCT	1284	6	-	Pisum sativum
HORVU.MOREX.r3.1HG0079700.1	WRE3	CCACCT	1628	6	+	Pisum sativum
HORVU.MOREX.r3.1HG0079700.1	WRE3	CCACCT	1670	6	+	Pisum sativum
HORVU.MOREX.r3.1HG0079700.1	G-box	TACGTG	23	6	+	Arabidopsis thaliana	cis-acting regulatory element involved in light responsiveness
HORVU.MOREX.r3.1HG0079700.1	G-box	CACGTG	1131	6	-	Arabidopsis thaliana	cis-acting regulatory element involved in light responsiveness
HORVU.MOREX.r3.1HG0079700.1	G-box	TACGTG	1737	6	-	Arabidopsis thaliana	cis-acting regulatory element involved in light responsiveness
HORVU.MOREX.r3.1HG0079700.1	CGTCA-motif	CGTCA	76	5	-	Hordeum vulgare	cis-acting regulatory element involved in the MeJA-responsiveness
HORVU.MOREX.r3.1HG0079700.1	CGTCA-motif	CGTCA	338	5	+	Hordeum vulgare	cis-acting regulatory element involved in the MeJA-responsiveness
HORVU.MOREX.r3.1HG0079700.1	TATA-box	TATAAAA	261	7	-	Pisum sativum	core promoter element around -30 of transcription start
HORVU.MOREX.r3.1HG0079700.1	TATA-box	TATAAA	262	6	-	Helianthus annuus	core promoter element around -30 of transcription start
HORVU.MOREX.r3.1HG0079700.1	TATA-box	TATAA	263	5	-	Arabidopsis thaliana	core promoter element around -30 of transcription start
HORVU.MOREX.r3.1HG0079700.1	TATA-box	TATA	264	4	+	Arabidopsis thaliana	core promoter element around -30 of transcription start
HORVU.MOREX.r3.1HG0079700.1	TATA-box	ATTATA	267	6	+	Brassica napus	core promoter element around -30 of transcription start
HORVU.MOREX.r3.1HG0079700.1	TATA-box	TATATAA	268	7	-	Arabidopsis thaliana	core promoter element around -30 of transcription start
HORVU.MOREX.r3.1HG0079700.1	TATA-box	TATATA	269	6	+	Arabidopsis thaliana	core promoter element around -30 of transcription start
HORVU.MOREX.r3.1HG0079700.1	TATA-box	ATATAT	270	6	+	Brassica napus	core promoter element around -30 of transcription start
HORVU.MOREX.r3.1HG0079700.1	TATA-box	TATA	271	4	+	Arabidopsis thaliana	core promoter element around -30 of transcription start
HORVU.MOREX.r3.1HG0079700.1	TATA-box	ATATAT	575	6	+	Brassica napus	core promoter element around -30 of transcription start
HORVU.MOREX.r3.1HG0079700.1	TATA-box	TATA	576	4	+	Arabidopsis thaliana	core promoter element around -30 of transcription start
HORVU.MOREX.r3.1HG0079700.1	TATA-box	ATTATA	608	6	+	Brassica napus	core promoter element around -30 of transcription start
HORVU.MOREX.r3.1HG0079700.1	TATA-box	TATATAA	609	7	-	Arabidopsis thaliana	core promoter element around -30 of transcription start
HORVU.MOREX.r3.1HG0079700.1	TATA-box	TATATA	610	6	+	Arabidopsis thaliana	core promoter element around -30 of transcription start
HORVU.MOREX.r3.1HG0079700.1	TATA-box	ATATAT	611	6	+	Brassica napus	core promoter element around -30 of transcription start
HORVU.MOREX.r3.1HG0079700.1	TATA-box	TATATA	612	6	+	Arabidopsis thaliana	core promoter element around -30 of transcription start
HORVU.MOREX.r3.1HG0079700.1	TATA-box	ATATAT	613	6	+	Brassica napus	core promoter element around -30 of transcription start
HORVU.MOREX.r3.1HG0079700.1	TATA-box	TATA	614	4	+	Arabidopsis thaliana	core promoter element around -30 of transcription start
HORVU.MOREX.r3.1HG0079700.1	TATA-box	TATTTAAA	646	8	-	Arabidopsis thaliana	core promoter element around -30 of transcription start
HORVU.MOREX.r3.1HG0079700.1	TATA-box	TATATAA	672	7	-	Arabidopsis thaliana	core promoter element around -30 of transcription start
HORVU.MOREX.r3.1HG0079700.1	TATA-box	TATATA	673	6	+	Arabidopsis thaliana	core promoter element around -30 of transcription start
HORVU.MOREX.r3.1HG0079700.1	TATA-box	ATATAT	674	6	+	Brassica napus	core promoter element around -30 of transcription start
HORVU.MOREX.r3.1HG0079700.1	TATA-box	TATA	675	4	+	Arabidopsis thaliana	core promoter element around -30 of transcription start
HORVU.MOREX.r3.1HG0079700.1	TATA-box	TATA	713	4	+	Arabidopsis thaliana	core promoter element around -30 of transcription start
HORVU.MOREX.r3.1HG0079700.1	TATA-box	TATA	727	4	+	Arabidopsis thaliana	core promoter element around -30 of transcription start
HORVU.MOREX.r3.1HG0079700.1	TATA-box	TATAA	1018	5	-	Arabidopsis thaliana	core promoter element around -30 of transcription start
HORVU.MOREX.r3.1HG0079700.1	TATA-box	TATA	1019	4	-	Arabidopsis thaliana	core promoter element around -30 of transcription start
HORVU.MOREX.r3.1HG0079700.1	TATA-box	TACATAAA	1266	8	+	Oryza sativa	core promoter element around -30 of transcription start
HORVU.MOREX.r3.1HG0079700.1	TATA-box	TAAAGATT	1298	8	+	Arabidopsis thaliana	core promoter element around -30 of transcription start
HORVU.MOREX.r3.1HG0079700.1	TATA-box	ccTATAAAaa	1441	10	+	Arabidopsis thaliana	core promoter element around -30 of transcription start
HORVU.MOREX.r3.1HG0079700.1	TATA-box	TATA	1443	4	-	Arabidopsis thaliana	core promoter element around -30 of transcription start
HORVU.MOREX.r3.1HG0079700.1	TATA-box	TATA	1833	4	-	Arabidopsis thaliana	core promoter element around -30 of transcription start
HORVU.MOREX.r3.1HG0079700.1	MYB-like sequence	TAACCA	1028	6	-	Arabidopsis thaliana
HORVU.MOREX.r3.1HG0079700.1	MYB-like sequence	TAACCA	1349	6	-	Arabidopsis thaliana
HORVU.MOREX.r3.1HG0079700.1	ABRE3a	TACGTG	23	6	+	Zea mays
HORVU.MOREX.r3.1HG0079700.1	ABRE3a	TACGTG	1737	6	-	Zea mays
HORVU.MOREX.r3.1HG0079700.1	GARE-motif	TCTGTTG	1698	7	+	Brassica oleracea	gibberellin-responsive element
HORVU.MOREX.r3.1HG0079700.1	CAAT-box	CAAT	74	4	-	Nicotiana glutinosa
HORVU.MOREX.r3.1HG0079700.1	CAAT-box	CAAT	112	4	+	Nicotiana glutinosa
HORVU.MOREX.r3.1HG0079700.1	CAAT-box	CAAT	202	4	-	Nicotiana glutinosa
HORVU.MOREX.r3.1HG0079700.1	CAAT-box	CAAT	249	4	+	Nicotiana glutinosa
HORVU.MOREX.r3.1HG0079700.1	CAAT-box	CAAT	282	4	-	Nicotiana glutinosa
HORVU.MOREX.r3.1HG0079700.1	CAAT-box	CAAT	286	4	-	Nicotiana glutinosa
HORVU.MOREX.r3.1HG0079700.1	CAAT-box	CCAAT	409	5	+	Arabidopsis thaliana	common cis-acting element in promoter and enhancer regions
HORVU.MOREX.r3.1HG0079700.1	CAAT-box	CAAT	410	4	+	Nicotiana glutinosa
HORVU.MOREX.r3.1HG0079700.1	CAAT-box	CAAT	460	4	+	Nicotiana glutinosa
HORVU.MOREX.r3.1HG0079700.1	CAAT-box	CAAAT	622	5	-	Pisum sativum	common cis-acting element in promoter and enhancer regions
HORVU.MOREX.r3.1HG0079700.1	CAAT-box	CAAT	757	4	-	Nicotiana glutinosa
HORVU.MOREX.r3.1HG0079700.1	CAAT-box	CAAAT	761	5	+	Pisum sativum	common cis-acting element in promoter and enhancer regions
HORVU.MOREX.r3.1HG0079700.1	CAAT-box	CCAAT	785	5	-	Arabidopsis thaliana	common cis-acting element in promoter and enhancer regions
HORVU.MOREX.r3.1HG0079700.1	CAAT-box	TGCCAAC	972	7	-	Petunia hybrida	common cis-acting element in promoter and enhancer regions
HORVU.MOREX.r3.1HG0079700.1	CAAT-box	CAAT	1192	4	+	Nicotiana glutinosa
HORVU.MOREX.r3.1HG0079700.1	CAAT-box	CCAAT	1194	5	-	Arabidopsis thaliana	common cis-acting element in promoter and enhancer regions
HORVU.MOREX.r3.1HG0079700.1	CAAT-box	CAAT	1244	4	+	Nicotiana glutinosa
HORVU.MOREX.r3.1HG0079700.1	CAAT-box	CAAAT	1279	5	+	Pisum sativum	common cis-acting element in promoter and enhancer regions
HORVU.MOREX.r3.1HG0079700.1	CAAT-box	CAAAT	1465	5	+	Pisum sativum	common cis-acting element in promoter and enhancer regions
HORVU.MOREX.r3.1HG0079700.1	CAAT-box	CAAAT	1554	5	+	Pisum sativum	common cis-acting element in promoter and enhancer regions
HORVU.MOREX.r3.1HG0079700.1		motif_sequence	255	4	+	organism	short_function
HORVU.MOREX.r3.1HG0079700.1		motif_sequence	299	4	+	organism	short_function
HORVU.MOREX.r3.1HG0079700.1		motif_sequence	469	4	-	organism	short_function
HORVU.MOREX.r3.1HG0079700.1		motif_sequence	1043	4	-	organism	short_function
HORVU.MOREX.r3.1HG0079700.1		motif_sequence	1565	4	+	organism	short_function
HORVU.MOREX.r3.1HG0079700.1		motif_sequence	1624	4	+	organism	short_function
HORVU.MOREX.r3.1HG0079700.1		motif_sequence	1711	4	+	organism	short_function
HORVU.MOREX.r3.1HG0079700.1		motif_sequence	1740	4	-	organism	short_function
HORVU.MOREX.r3.1HG0079700.1		motif_sequence	1871	4	-	organism	short_function
HORVU.MOREX.r3.1HG0079700.1		motif_sequence	1981	4	+	organism	short_function
HORVU.MOREX.r3.1HG0079700.1	TGA-element	AACGAC	332	6	-	Brassica oleracea	auxin-responsive element
HORVU.MOREX.r3.1HG0079700.1	GC-motif	CCCCCG	440	6	+	Zea mays	enhancer-like element involved in anoxic specific inducibility
HORVU.MOREX.r3.1HG0079700.1	GC-motif	CCCCCG	1074	6	-	Zea mays	enhancer-like element involved in anoxic specific inducibility
HORVU.MOREX.r3.1HG0079700.1	Box II	ACACGTTGT	979	9	-	Sinapis alba	part of a light responsive element
HORVU.MOREX.r3.1HG0079700.1	Box 4	ATTAAT	541	6	+	Petroselinum crispum	part of a conserved DNA module involved in light responsiveness
HORVU.MOREX.r3.1HG0079700.1	box S	AGCCACC	1917	7	-	Arabidopsis thaliana
HORVU.MOREX.r3.1HG0079700.1	as-1	TGACG	76	5	+	Arabidopsis thaliana
HORVU.MOREX.r3.1HG0079700.1	as-1	TGACG	338	5	-	Arabidopsis thaliana
HORVU.MOREX.r3.1HG0079700.1	TCCC-motif	TCTCCCT	1514	7	-	Spinacia oleracea	part of a light responsive element
HORVU.MOREX.r3.1HG0079700.1	DRE core	GCCGAC	1856	6	-	Arabidopsis thaliana
HORVU.MOREX.r3.1HG0079700.1	AAGAA-motif	GAAAGAA	732	7	-	Avena sativa
HORVU.MOREX.r3.1HG0079700.1	AAGAA-motif	GAAAGAA	1519	7	+	Avena sativa
HORVU.MOREX.r3.1HG0079700.1	ABRE	ACGTG	24	5	+	Arabidopsis thaliana	cis-acting element involved in the abscisic acid responsiveness
HORVU.MOREX.r3.1HG0079700.1	ABRE	ACGTG	982	5	+	Arabidopsis thaliana	cis-acting element involved in the abscisic acid responsiveness
HORVU.MOREX.r3.1HG0079700.1	ABRE	CACGTG	1131	6	-	Arabidopsis thaliana	cis-acting element involved in the abscisic acid responsiveness
HORVU.MOREX.r3.1HG0079700.1	ABRE	ACGTG	1132	5	+	Arabidopsis thaliana	cis-acting element involved in the abscisic acid responsiveness
HORVU.MOREX.r3.1HG0079700.1	ABRE	TACGTGTC	1735	8	-	Oryza sativa	cis-acting element involved in the abscisic acid responsiveness
HORVU.MOREX.r3.1HG0079700.1	ABRE	ACGTG	1737	5	-	Arabidopsis thaliana	cis-acting element involved in the abscisic acid responsiveness
HORVU.MOREX.r3.1HG0079700.1	ABRE	AACCCGG	1785	7	+	Arabidopsis thaliana	cis-acting element involved in the abscisic acid responsiveness
HORVU.MOREX.r3.1HG0079700.1	Myc	TCTCTTA	1058	7	+	Arabidopsis thaliana
HORVU.MOREX.r3.1HG0079700.1	TGACG-motif	TGACG	76	5	+	Hordeum vulgare	cis-acting regulatory element involved in the MeJA-responsiveness
HORVU.MOREX.r3.1HG0079700.1	TGACG-motif	TGACG	338	5	-	Hordeum vulgare	cis-acting regulatory element involved in the MeJA-responsiveness
HORVU.MOREX.r3.1HG0079700.1	AuxRR-core	GGTCCAT	748	7	-	Nicotiana tabacum	cis-acting regulatory element involved in auxin responsiveness
HORVU.MOREX.r3.1HG0079700.1	ARE	AAACCA	406	6	+	Zea mays	cis-acting regulatory element essential for the anaerobic induction
HORVU.MOREX.r3.1HG0079700.1	ACE	GACACGTATG	21	9	-	Petroselinum crispum	cis-acting element involved in light responsiveness
HORVU.MOREX.r3.1HG0079700.1	ACE	GCGACGTACC	1898	9	+	Petroselinum crispum	cis-acting element involved in light responsiveness
HORVU.MOREX.r3.1HG0079700.1	MYC	CATGTG	38	6	-	Arabidopsis thaliana
HORVU.MOREX.r3.1HG0079700.1	MYC	CATGTG	1046	6	+	Arabidopsis thaliana
HORVU.MOREX.r3.1HG0079700.1	MYC	CATGTG	1165	6	-	Arabidopsis thaliana
HORVU.MOREX.r3.1HG0079700.1	MYC	CAATTG	1192	6	-	Arabidopsis thaliana
HORVU.MOREX.r3.1HG0079700.1	MYC	CATTTG	1554	6	-	Arabidopsis thaliana
HORVU.MOREX.r3.1HG0079700.1	Myb-binding site	CAACAG	970	6	-	Nicotiana tabacum
HORVU.MOREX.r3.1HG0079700.1	Myb-binding site	CAACAG	1699	6	-	Nicotiana tabacum
HORVU.MOREX.r3.1HG0079700.1	Myb	CAACTG	96	6	-	Arabidopsis thaliana
HORVU.MOREX.r3.1HG0079700.1	Myb	CAACTG	178	6	-	Arabidopsis thaliana
HORVU.MOREX.r3.1HG0079700.1	Myb	TAACTG	1036	6	-	Arabidopsis thaliana
HORVU.MOREX.r3.1HG0079700.1	Myb	CAACTG	1690	6	-	Arabidopsis thaliana
HORVU.MOREX.r3.1HG0079700.1	Unnamed__4	CTCC	1068	4	-	Petroselinum hortense
HORVU.MOREX.r3.1HG0079700.1	Unnamed__4	CTCC	1088	4	+	Petroselinum hortense
HORVU.MOREX.r3.1HG0079700.1	Unnamed__4	CTCC	1308	4	-	Petroselinum hortense
HORVU.MOREX.r3.1HG0079700.1	Unnamed__4	CTCC	1345	4	-	Petroselinum hortense
HORVU.MOREX.r3.1HG0079700.1	Unnamed__4	CTCC	1512	4	-	Petroselinum hortense
HORVU.MOREX.r3.1HG0079700.1	Unnamed__4	CTCC	1516	4	-	Petroselinum hortense
HORVU.MOREX.r3.1HG0079700.1	Unnamed__4	CTCC	1599	4	+	Petroselinum hortense
HORVU.MOREX.r3.1HG0079700.1	Unnamed__4	CTCC	1620	4	+	Petroselinum hortense
HORVU.MOREX.r3.1HG0079700.1	Unnamed__4	CTCC	1626	4	+	Petroselinum hortense
HORVU.MOREX.r3.1HG0079700.1	Unnamed__4	CTCC	1713	4	+	Petroselinum hortense
HORVU.MOREX.r3.1HG0079700.1	Unnamed__4	CTCC	1731	4	+	Petroselinum hortense
HORVU.MOREX.r3.1HG0079700.1	Unnamed__4	CTCC	1961	4	-	Petroselinum hortense
HORVU.MOREX.r3.1HG0079700.1	MBS	CAACTG	96	6	-	Arabidopsis thaliana	MYB binding site involved in drought-inducibility
HORVU.MOREX.r3.1HG0079700.1	MBS	CAACTG	178	6	-	Arabidopsis thaliana	MYB binding site involved in drought-inducibility
HORVU.MOREX.r3.1HG0079700.1	MBS	CAACTG	1690	6	-	Arabidopsis thaliana	MYB binding site involved in drought-inducibility
HORVU.MOREX.r3.1HG0079700.1	AT~TATA-box	TATATA	269	6	+	Arabidopsis thaliana
HORVU.MOREX.r3.1HG0079700.1	AT~TATA-box	TATATA	610	6	+	Arabidopsis thaliana
HORVU.MOREX.r3.1HG0079700.1	AT~TATA-box	TATATA	612	6	+	Arabidopsis thaliana
HORVU.MOREX.r3.1HG0079700.1	AT~TATA-box	TATATA	673	6	+	Arabidopsis thaliana
HORVU.MOREX.r3.1HG0079700.1	LTR	CCGAAA	867	6	+	Hordeum vulgare	cis-acting element involved in low-temperature responsiveness
HORVU.MOREX.r3.1HG0079700.1	WUN-motif	AAATTACTA	1466	9	+	Nicotiana glutinosa
HORVU.MOREX.r3.1HG0079700.1	STRE	AGGGG	1340	5	+	Arabidopsis thaliana
HORVU.MOREX.r3.1HG0079700.1	Unnamed__1	CGTGG	81	5	+	Zea mays
HORVU.MOREX.r3.1HG0079700.1	Unnamed__1	CGTGG	834	5	+	Zea mays
HORVU.MOREX.r3.1HG0079700.1	MYB	CAACAG	970	6	-	Arabidopsis thaliana
HORVU.MOREX.r3.1HG0079700.1	MYB	TAACCA	1028	6	-	Arabidopsis thaliana
HORVU.MOREX.r3.1HG0079700.1	MYB	TAACCA	1349	6	-	Arabidopsis thaliana
HORVU.MOREX.r3.1HG0079700.1	MYB	CAACAG	1699	6	-	Arabidopsis thaliana
HORVU.MOREX.r3.1HG0079700.1	ERE	ATTTTAAA	49	8	-	Nicotiana glutinos
HORVU.MOREX.r3.1HG0079700.1	ERE	ATTTCATA	616	8	-	Nicotiana glutinos
HORVU.MOREX.r3.1HG0079700.1	Unnamed__2	CCCCGG	1073	6	-	Zea mays
HORVU.MOREX.r3.1HG0079700.1	CAT-box	GCCACT	966	6	+	Arabidopsis thaliana	cis-acting regulatory element related to meristem expression
HORVU.MOREX.r3.1HG0079700.1	ABRE4	CACGTA	23	6	-	Zea mays
HORVU.MOREX.r3.1HG0079700.1	ABRE4	CACGTA	1737	6	+	Zea mays
HORVU.MOREX.r3.1HG0079700.1	G-Box	CACGTT	981	6	-	Pisum sativum	cis-acting regulatory element involved in light responsiveness
HORVU.MOREX.r3.1HG0079700.1	G-Box	CACGTG	1131	6	-	Pisum sativum	cis-acting regulatory element involved in light responsiveness
HORVU.MOREX.r3.1HG0079760.1	GT1-motif	GGTTAA	989	6	-	Arabidopsis thaliana	light responsive element
HORVU.MOREX.r3.1HG0079760.1	GT1-motif	GGTTAA	1169	6	+	Arabidopsis thaliana	light responsive element
HORVU.MOREX.r3.1HG0079760.1	Myb-binding site	CAACAG	559	6	-	Nicotiana tabacum
HORVU.MOREX.r3.1HG0079760.1	Myb-binding site	CAACAG	1631	6	+	Nicotiana tabacum
HORVU.MOREX.r3.1HG0079760.1	MYC	CATTTG	996	6	+	Arabidopsis thaliana
HORVU.MOREX.r3.1HG0079760.1	MYC	CATTTG	1524	6	-	Arabidopsis thaliana
HORVU.MOREX.r3.1HG0079760.1	MYC	CATTTG	1637	6	+	Arabidopsis thaliana
HORVU.MOREX.r3.1HG0079760.1	ACE	GCGACGTACC	647	9	+	Petroselinum crispum	cis-acting element involved in light responsiveness
HORVU.MOREX.r3.1HG0079760.1	ARE	AAACCA	31	6	+	Zea mays	cis-acting regulatory element essential for the anaerobic induction
HORVU.MOREX.r3.1HG0079760.1	ARE	AAACCA	253	6	-	Zea mays	cis-acting regulatory element essential for the anaerobic induction
HORVU.MOREX.r3.1HG0079760.1	ARE	AAACCA	1253	6	+	Zea mays	cis-acting regulatory element essential for the anaerobic induction
HORVU.MOREX.r3.1HG0079760.1	AuxRR-core	GGTCCAT	1930	7	+	Nicotiana tabacum	cis-acting regulatory element involved in auxin responsiveness
HORVU.MOREX.r3.1HG0079760.1	MYB recognition site	CCGTTG	1141	6	+	Arabidopsis thaliana
HORVU.MOREX.r3.1HG0079760.1	MYB recognition site	CCGTTG	1362	6	+	Arabidopsis thaliana
HORVU.MOREX.r3.1HG0079760.1	MBS	CAACTG	96	6	+	Arabidopsis thaliana	MYB binding site involved in drought-inducibility
HORVU.MOREX.r3.1HG0079760.1	MBS	CAACTG	2008	6	+	Arabidopsis thaliana	MYB binding site involved in drought-inducibility
HORVU.MOREX.r3.1HG0079760.1	Unnamed__4	CTCC	170	4	+	Petroselinum hortense
HORVU.MOREX.r3.1HG0079760.1	Unnamed__4	CTCC	193	4	+	Petroselinum hortense
HORVU.MOREX.r3.1HG0079760.1	Unnamed__4	CTCC	536	4	-	Petroselinum hortense
HORVU.MOREX.r3.1HG0079760.1	Unnamed__4	CTCC	603	4	+	Petroselinum hortense
HORVU.MOREX.r3.1HG0079760.1	Unnamed__4	CTCC	670	4	+	Petroselinum hortense
HORVU.MOREX.r3.1HG0079760.1	Unnamed__4	CTCC	673	4	+	Petroselinum hortense
HORVU.MOREX.r3.1HG0079760.1	Unnamed__4	CTCC	806	4	+	Petroselinum hortense
HORVU.MOREX.r3.1HG0079760.1	Unnamed__4	CTCC	1237	4	+	Petroselinum hortense
HORVU.MOREX.r3.1HG0079760.1	Unnamed__4	CTCC	1268	4	+	Petroselinum hortense
HORVU.MOREX.r3.1HG0079760.1	Unnamed__4	CTCC	1406	4	-	Petroselinum hortense
HORVU.MOREX.r3.1HG0079760.1	Unnamed__4	CTCC	1420	4	-	Petroselinum hortense
HORVU.MOREX.r3.1HG0079760.1	Unnamed__4	CTCC	1448	4	-	Petroselinum hortense
HORVU.MOREX.r3.1HG0079760.1	Unnamed__4	CTCC	1514	4	+	Petroselinum hortense
HORVU.MOREX.r3.1HG0079760.1	Unnamed__4	CTCC	1658	4	+	Petroselinum hortense
HORVU.MOREX.r3.1HG0079760.1	Unnamed__4	CTCC	1771	4	+	Petroselinum hortense
HORVU.MOREX.r3.1HG0079760.1	Unnamed__4	CTCC	1827	4	+	Petroselinum hortense
HORVU.MOREX.r3.1HG0079760.1	Unnamed__4	CTCC	1833	4	+	Petroselinum hortense
HORVU.MOREX.r3.1HG0079760.1	Unnamed__4	CTCC	1839	4	+	Petroselinum hortense
HORVU.MOREX.r3.1HG0079760.1	Unnamed__4	CTCC	1845	4	+	Petroselinum hortense
HORVU.MOREX.r3.1HG0079760.1	Unnamed__4	CTCC	1914	4	-	Petroselinum hortense
HORVU.MOREX.r3.1HG0079760.1	Unnamed__4	CTCC	1955	4	+	Petroselinum hortense
HORVU.MOREX.r3.1HG0079760.1	Unnamed__4	CTCC	1998	4	-	Petroselinum hortense
HORVU.MOREX.r3.1HG0079760.1	CCGTCC motif	CCGTCC	832	6	+	Nicotiana tabacum
HORVU.MOREX.r3.1HG0079760.1	CCGTCC motif	CCGTCC	1070	6	-	Nicotiana tabacum
HORVU.MOREX.r3.1HG0079760.1	CCGTCC motif	CCGTCC	1957	6	+	Nicotiana tabacum
HORVU.MOREX.r3.1HG0079760.1	Myb	CAACTG	96	6	+	Arabidopsis thaliana
HORVU.MOREX.r3.1HG0079760.1	Myb	CAACTG	2008	6	+	Arabidopsis thaliana
HORVU.MOREX.r3.1HG0079760.1	Unnamed__1	CGTGG	417	5	+	Zea mays
HORVU.MOREX.r3.1HG0079760.1	Unnamed__1	CGTGG	735	5	+	Zea mays
HORVU.MOREX.r3.1HG0079760.1	Unnamed__1	CGTGG	808	5	-	Zea mays
HORVU.MOREX.r3.1HG0079760.1	Unnamed__1	CGTGG	1879	5	-	Zea mays
HORVU.MOREX.r3.1HG0079760.1	Unnamed__1	CGTGG	1965	5	-	Zea mays
HORVU.MOREX.r3.1HG0079760.1	STRE	AGGGG	617	5	-	Arabidopsis thaliana
HORVU.MOREX.r3.1HG0079760.1	AT~TATA-box	TATATA	1893	6	-	Arabidopsis thaliana
HORVU.MOREX.r3.1HG0079760.1	G-Box	CACGTG	211	6	+	Pisum sativum	cis-acting regulatory element involved in light responsiveness
HORVU.MOREX.r3.1HG0079760.1	G-Box	CACGTT	499	6	+	Pisum sativum	cis-acting regulatory element involved in light responsiveness
HORVU.MOREX.r3.1HG0079760.1	G-Box	CACGTT	545	6	+	Pisum sativum	cis-acting regulatory element involved in light responsiveness
HORVU.MOREX.r3.1HG0079760.1	G-Box	CACGTT	642	6	-	Pisum sativum	cis-acting regulatory element involved in light responsiveness
HORVU.MOREX.r3.1HG0079760.1	G-Box	CACGTT	1113	6	-	Pisum sativum	cis-acting regulatory element involved in light responsiveness
HORVU.MOREX.r3.1HG0079760.1	ABRE4	CACGTA	1676	6	+	Zea mays
HORVU.MOREX.r3.1HG0079760.1	TCA-element	CCATCTTTTT	1585	9	-	Nicotiana tabacum	cis-acting element involved in salicylic acid responsiveness
HORVU.MOREX.r3.1HG0079760.1	CAT-box	GCCACT	792	6	+	Arabidopsis thaliana	cis-acting regulatory element related to meristem expression
HORVU.MOREX.r3.1HG0079760.1	A-box	CCGTCC	832	6	+	Petroselinum crispum	cis-acting regulatory element
HORVU.MOREX.r3.1HG0079760.1	A-box	CCGTCC	1070	6	-	Petroselinum crispum	cis-acting regulatory element
HORVU.MOREX.r3.1HG0079760.1	A-box	CCGTCC	1957	6	+	Petroselinum crispum	cis-acting regulatory element
HORVU.MOREX.r3.1HG0079760.1	MYB	CAACAG	559	6	-	Arabidopsis thaliana
HORVU.MOREX.r3.1HG0079760.1	MYB	TAACCA	685	6	-	Arabidopsis thaliana
HORVU.MOREX.r3.1HG0079760.1	MYB	TAACCA	990	6	+	Arabidopsis thaliana
HORVU.MOREX.r3.1HG0079760.1	MYB	TAACCA	1596	6	+	Arabidopsis thaliana
HORVU.MOREX.r3.1HG0079760.1	MYB	CAACAG	1631	6	+	Arabidopsis thaliana
HORVU.MOREX.r3.1HG0079760.1	MYB-like sequence	TAACCA	685	6	-	Arabidopsis thaliana
HORVU.MOREX.r3.1HG0079760.1	MYB-like sequence	TAACCA	990	6	+	Arabidopsis thaliana
HORVU.MOREX.r3.1HG0079760.1	MYB-like sequence	TAACCA	1596	6	+	Arabidopsis thaliana
HORVU.MOREX.r3.1HG0079760.1	TATA-box	TATA	19	4	+	Arabidopsis thaliana	core promoter element around -30 of transcription start
HORVU.MOREX.r3.1HG0079760.1	TATA-box	TACAAAA	951	7	+	Oryza sativa	core promoter element around -30 of transcription start
HORVU.MOREX.r3.1HG0079760.1	TATA-box	ATTATA	1579	6	+	Brassica napus	core promoter element around -30 of transcription start
HORVU.MOREX.r3.1HG0079760.1	TATA-box	TATAA	1580	5	-	Arabidopsis thaliana	core promoter element around -30 of transcription start
HORVU.MOREX.r3.1HG0079760.1	TATA-box	TATA	1581	4	-	Arabidopsis thaliana	core promoter element around -30 of transcription start
HORVU.MOREX.r3.1HG0079760.1	TATA-box	ATTATA	1601	6	+	Brassica napus	core promoter element around -30 of transcription start
HORVU.MOREX.r3.1HG0079760.1	TATA-box	TATAA	1602	5	-	Arabidopsis thaliana	core promoter element around -30 of transcription start
HORVU.MOREX.r3.1HG0079760.1	TATA-box	TATA	1603	4	-	Arabidopsis thaliana	core promoter element around -30 of transcription start
HORVU.MOREX.r3.1HG0079760.1	TATA-box	ATTATA	1730	6	+	Brassica napus	core promoter element around -30 of transcription start
HORVU.MOREX.r3.1HG0079760.1	TATA-box	TATAA	1731	5	-	Arabidopsis thaliana	core promoter element around -30 of transcription start
HORVU.MOREX.r3.1HG0079760.1	TATA-box	TATA	1732	4	-	Arabidopsis thaliana	core promoter element around -30 of transcription start
HORVU.MOREX.r3.1HG0079760.1	TATA-box	ATATAT	1892	6	-	Brassica napus	core promoter element around -30 of transcription start
HORVU.MOREX.r3.1HG0079760.1	TATA-box	TATATA	1893	6	-	Arabidopsis thaliana	core promoter element around -30 of transcription start
HORVU.MOREX.r3.1HG0079760.1	TATA-box	TATA	1895	4	-	Arabidopsis thaliana	core promoter element around -30 of transcription start
HORVU.MOREX.r3.1HG0079760.1	CGTCA-motif	CGTCA	197	5	+	Hordeum vulgare	cis-acting regulatory element involved in the MeJA-responsiveness
HORVU.MOREX.r3.1HG0079760.1	CGTCA-motif	CGTCA	374	5	-	Hordeum vulgare	cis-acting regulatory element involved in the MeJA-responsiveness
HORVU.MOREX.r3.1HG0079760.1	CGTCA-motif	CGTCA	1193	5	-	Hordeum vulgare	cis-acting regulatory element involved in the MeJA-responsiveness
HORVU.MOREX.r3.1HG0079760.1	CGTCA-motif	CGTCA	1307	5	-	Hordeum vulgare	cis-acting regulatory element involved in the MeJA-responsiveness
HORVU.MOREX.r3.1HG0079760.1	G-box	CACGTG	211	6	+	Arabidopsis thaliana	cis-acting regulatory element involved in light responsiveness
HORVU.MOREX.r3.1HG0079760.1	G-box	CACGTC	1155	6	-	Zea mays	cis-acting regulatory element involved in light responsiveness
HORVU.MOREX.r3.1HG0079760.1	G-box	CACGAC	1214	6	+	Zea mays	cis-acting regulatory element involved in light responsiveness
HORVU.MOREX.r3.1HG0079760.1	G-box	CACGTC	1458	6	+	Zea mays	cis-acting regulatory element involved in light responsiveness
HORVU.MOREX.r3.1HG0079760.1	G-box	TACGTG	1676	6	-	Arabidopsis thaliana	cis-acting regulatory element involved in light responsiveness
HORVU.MOREX.r3.1HG0079760.1	TGA-element	AACGAC	714	6	+	Brassica oleracea	auxin-responsive element
HORVU.MOREX.r3.1HG0079760.1	TGA-element	AACGAC	883	6	+	Brassica oleracea	auxin-responsive element
HORVU.MOREX.r3.1HG0079760.1		motif_sequence	168	4	+	organism	short_function
HORVU.MOREX.r3.1HG0079760.1		motif_sequence	203	4	+	organism	short_function
HORVU.MOREX.r3.1HG0079760.1		motif_sequence	227	4	-	organism	short_function
HORVU.MOREX.r3.1HG0079760.1		motif_sequence	286	4	+	organism	short_function
HORVU.MOREX.r3.1HG0079760.1		motif_sequence	337	4	+	organism	short_function
HORVU.MOREX.r3.1HG0079760.1		motif_sequence	440	4	+	organism	short_function
HORVU.MOREX.r3.1HG0079760.1		motif_sequence	573	4	-	organism	short_function
HORVU.MOREX.r3.1HG0079760.1		motif_sequence	611	4	-	organism	short_function
HORVU.MOREX.r3.1HG0079760.1		motif_sequence	656	4	+	organism	short_function
HORVU.MOREX.r3.1HG0079760.1		motif_sequence	727	4	-	organism	short_function
HORVU.MOREX.r3.1HG0079760.1		motif_sequence	1063	4	-	organism	short_function
HORVU.MOREX.r3.1HG0079760.1		motif_sequence	1235	4	+	organism	short_function
HORVU.MOREX.r3.1HG0079760.1		motif_sequence	1324	4	-	organism	short_function
HORVU.MOREX.r3.1HG0079760.1		motif_sequence	1420	4	-	organism	short_function
HORVU.MOREX.r3.1HG0079760.1		motif_sequence	1702	4	+	organism	short_function
HORVU.MOREX.r3.1HG0079760.1		motif_sequence	1831	4	+	organism	short_function
HORVU.MOREX.r3.1HG0079760.1		motif_sequence	1837	4	+	organism	short_function
HORVU.MOREX.r3.1HG0079760.1		motif_sequence	1843	4	+	organism	short_function
HORVU.MOREX.r3.1HG0079760.1	CCAAT-box	CAACGG	1141	6	-	Hordeum vulgare	MYBHv1 binding site
HORVU.MOREX.r3.1HG0079760.1	CCAAT-box	CAACGG	1362	6	-	Hordeum vulgare	MYBHv1 binding site
HORVU.MOREX.r3.1HG0079760.1	CAAT-box	CAAT	115	4	+	Nicotiana glutinosa
HORVU.MOREX.r3.1HG0079760.1	CAAT-box	CAAT	177	4	+	Nicotiana glutinosa
HORVU.MOREX.r3.1HG0079760.1	CAAT-box	CCAAT	244	5	-	Arabidopsis thaliana	common cis-acting element in promoter and enhancer regions
HORVU.MOREX.r3.1HG0079760.1	CAAT-box	CAAAT	329	5	-	Pisum sativum	common cis-acting element in promoter and enhancer regions
HORVU.MOREX.r3.1HG0079760.1	CAAT-box	CAAT	478	4	+	Nicotiana glutinosa
HORVU.MOREX.r3.1HG0079760.1	CAAT-box	CAAAT	492	5	-	Pisum sativum	common cis-acting element in promoter and enhancer regions
HORVU.MOREX.r3.1HG0079760.1	CAAT-box	CAAAT	519	5	-	Pisum sativum	common cis-acting element in promoter and enhancer regions
HORVU.MOREX.r3.1HG0079760.1	CAAT-box	CAAT	700	4	+	Nicotiana glutinosa
HORVU.MOREX.r3.1HG0079760.1	CAAT-box	CAAT	709	4	-	Nicotiana glutinosa
HORVU.MOREX.r3.1HG0079760.1	CAAT-box	CAAAT	997	5	-	Pisum sativum	common cis-acting element in promoter and enhancer regions
HORVU.MOREX.r3.1HG0079760.1	CAAT-box	CAAAT	1012	5	-	Pisum sativum	common cis-acting element in promoter and enhancer regions
HORVU.MOREX.r3.1HG0079760.1	CAAT-box	CAAAT	1190	5	-	Pisum sativum	common cis-acting element in promoter and enhancer regions
HORVU.MOREX.r3.1HG0079760.1	CAAT-box	CAAT	1321	4	-	Nicotiana glutinosa
HORVU.MOREX.r3.1HG0079760.1	CAAT-box	CAAT	1350	4	-	Nicotiana glutinosa
HORVU.MOREX.r3.1HG0079760.1	CAAT-box	CAAAT	1524	5	+	Pisum sativum	common cis-acting element in promoter and enhancer regions
HORVU.MOREX.r3.1HG0079760.1	CAAT-box	CAAT	1569	4	-	Nicotiana glutinosa
HORVU.MOREX.r3.1HG0079760.1	CAAT-box	CAAAT	1638	5	-	Pisum sativum	common cis-acting element in promoter and enhancer regions
HORVU.MOREX.r3.1HG0079760.1	CAAT-box	CCAAT	1773	5	+	Arabidopsis thaliana	common cis-acting element in promoter and enhancer regions
HORVU.MOREX.r3.1HG0079760.1	CAAT-box	CAAT	1774	4	+	Nicotiana glutinosa
HORVU.MOREX.r3.1HG0079760.1	CAAT-box	CAAT	1780	4	-	Nicotiana glutinosa
HORVU.MOREX.r3.1HG0079760.1	CAAT-box	CAAT	1791	4	-	Nicotiana glutinosa
HORVU.MOREX.r3.1HG0079760.1	CAAT-box	CAAT	1950	4	-	Nicotiana glutinosa
HORVU.MOREX.r3.1HG0079760.1	ABRE3a	TACGTG	1676	6	-	Zea mays
HORVU.MOREX.r3.1HG0079760.1	TCCC-motif	TCTCCCT	1832	7	+	Spinacia oleracea	part of a light responsive element
HORVU.MOREX.r3.1HG0079760.1	TCCC-motif	TCTCCCT	1838	7	+	Spinacia oleracea	part of a light responsive element
HORVU.MOREX.r3.1HG0079760.1	TCCC-motif	TCTCCCT	1844	7	+	Spinacia oleracea	part of a light responsive element
HORVU.MOREX.r3.1HG0079760.1	as-1	TGACG	197	5	-	Arabidopsis thaliana
HORVU.MOREX.r3.1HG0079760.1	as-1	TGACG	374	5	+	Arabidopsis thaliana
HORVU.MOREX.r3.1HG0079760.1	as-1	TGACG	1193	5	+	Arabidopsis thaliana
HORVU.MOREX.r3.1HG0079760.1	as-1	TGACG	1307	5	+	Arabidopsis thaliana
HORVU.MOREX.r3.1HG0079760.1	AT1-motif	AATTATTTTTTATT	1558	13	-	Solanum tuberosum	part of a light responsive module
HORVU.MOREX.r3.1HG0079760.1	TGACG-motif	TGACG	197	5	-	Hordeum vulgare	cis-acting regulatory element involved in the MeJA-responsiveness
HORVU.MOREX.r3.1HG0079760.1	TGACG-motif	TGACG	374	5	+	Hordeum vulgare	cis-acting regulatory element involved in the MeJA-responsiveness
HORVU.MOREX.r3.1HG0079760.1	TGACG-motif	TGACG	1193	5	+	Hordeum vulgare	cis-acting regulatory element involved in the MeJA-responsiveness
HORVU.MOREX.r3.1HG0079760.1	TGACG-motif	TGACG	1307	5	+	Hordeum vulgare	cis-acting regulatory element involved in the MeJA-responsiveness
HORVU.MOREX.r3.1HG0079760.1	ABRE	CGCACGTGTC	209	9	+	Hordeum vulgare	cis-acting element involved in the abscisic acid responsiveness
HORVU.MOREX.r3.1HG0079760.1	ABRE	CACGTG	211	6	+	Arabidopsis thaliana	cis-acting element involved in the abscisic acid responsiveness
HORVU.MOREX.r3.1HG0079760.1	ABRE	ACGTG	212	5	+	Arabidopsis thaliana	cis-acting element involved in the abscisic acid responsiveness
HORVU.MOREX.r3.1HG0079760.1	ABRE	ACGTG	499	5	-	Arabidopsis thaliana	cis-acting element involved in the abscisic acid responsiveness
HORVU.MOREX.r3.1HG0079760.1	ABRE	ACGTG	545	5	-	Arabidopsis thaliana	cis-acting element involved in the abscisic acid responsiveness
HORVU.MOREX.r3.1HG0079760.1	ABRE	CGTACGTGCA	606	9	+	Hordeum vulgare	cis-acting element involved in the abscisic acid responsiveness
HORVU.MOREX.r3.1HG0079760.1	ABRE	ACGTG	643	5	+	Arabidopsis thaliana	cis-acting element involved in the abscisic acid responsiveness
HORVU.MOREX.r3.1HG0079760.1	ABRE	CGTACGTGCA	722	9	+	Hordeum vulgare	cis-acting element involved in the abscisic acid responsiveness
HORVU.MOREX.r3.1HG0079760.1	ABRE	AACCCGG	979	7	-	Arabidopsis thaliana	cis-acting element involved in the abscisic acid responsiveness
HORVU.MOREX.r3.1HG0079760.1	ABRE	ACGTG	1114	5	+	Arabidopsis thaliana	cis-acting element involved in the abscisic acid responsiveness
HORVU.MOREX.r3.1HG0079760.1	ABRE	ACGTG	1156	5	+	Arabidopsis thaliana	cis-acting element involved in the abscisic acid responsiveness
HORVU.MOREX.r3.1HG0079760.1	ABRE	ACGTG	1458	5	-	Arabidopsis thaliana	cis-acting element involved in the abscisic acid responsiveness
HORVU.MOREX.r3.1HG0079760.1	ABRE	ACGTG	1676	5	-	Arabidopsis thaliana	cis-acting element involved in the abscisic acid responsiveness
HORVU.MOREX.r3.1HG0079760.1	ABRE	CGCACGTGTC	1756	9	+	Hordeum vulgare	cis-acting element involved in the abscisic acid responsiveness
HORVU.MOREX.r3.1HG0079760.1	CCGTCC-box	CCGTCC	832	6	+	Petroselinum hortense
HORVU.MOREX.r3.1HG0079760.1	CCGTCC-box	CCGTCC	1070	6	-	Petroselinum hortense
HORVU.MOREX.r3.1HG0079760.1	CCGTCC-box	CCGTCC	1957	6	+	Petroselinum hortense
HORVU.MOREX.r3.1HG0079760.1	DRE core	GCCGAC	1122	6	-	Arabidopsis thaliana
HORVU.MOREX.r3.1HG0079760.1	DRE core	GCCGAC	1940	6	+	Arabidopsis thaliana
HORVU.MOREX.r3.1HG0084760.1	Box 4	ATTAAT	1470	6	-	Petroselinum crispum	part of a conserved DNA module involved in light responsiveness
HORVU.MOREX.r3.1HG0084760.1	NON	CAACGGCCACG	1525	10	-	Nicotiana tabacum
HORVU.MOREX.r3.1HG0084760.1	GC-motif	CCCCCG	1727	6	+	Zea mays	enhancer-like element involved in anoxic specific inducibility
HORVU.MOREX.r3.1HG0084760.1	AE-box	AGAAACTT	282	8	+	Arabidopsis thaliana	part of a module for light response
HORVU.MOREX.r3.1HG0084760.1	as-1	TGACG	1156	5	-	Arabidopsis thaliana
HORVU.MOREX.r3.1HG0084760.1	as-1	TGACG	1167	5	+	Arabidopsis thaliana
HORVU.MOREX.r3.1HG0084760.1	RY-element	CATGCATG	861	8	+	Helianthus annuus	cis-acting regulatory element involved in seed-specific regulation
HORVU.MOREX.r3.1HG0084760.1	RY-element	CATGCATG	894	8	+	Helianthus annuus	cis-acting regulatory element involved in seed-specific regulation
HORVU.MOREX.r3.1HG0084760.1	RY-element	CATGCATG	898	8	+	Helianthus annuus	cis-acting regulatory element involved in seed-specific regulation
HORVU.MOREX.r3.1HG0084760.1	RY-element	CATGCATG	902	8	+	Helianthus annuus	cis-acting regulatory element involved in seed-specific regulation
HORVU.MOREX.r3.1HG0084760.1	RY-element	CATGCATG	1070	8	-	Helianthus annuus	cis-acting regulatory element involved in seed-specific regulation
HORVU.MOREX.r3.1HG0084760.1	CCGTCC-box	CCGTCC	1143	6	+	Petroselinum hortense
HORVU.MOREX.r3.1HG0084760.1	CCGTCC-box	CCGTCC	1239	6	+	Petroselinum hortense
HORVU.MOREX.r3.1HG0084760.1	DRE core	GCCGAC	1704	6	+	Arabidopsis thaliana
HORVU.MOREX.r3.1HG0084760.1	AAGAA-motif	gGTAAAGAAA	340	9	+	Avena sativa
HORVU.MOREX.r3.1HG0084760.1	TGACG-motif	TGACG	1156	5	-	Hordeum vulgare	cis-acting regulatory element involved in the MeJA-responsiveness
HORVU.MOREX.r3.1HG0084760.1	TGACG-motif	TGACG	1167	5	+	Hordeum vulgare	cis-acting regulatory element involved in the MeJA-responsiveness
HORVU.MOREX.r3.1HG0084760.1	ABRE	ACGTG	746	5	-	Arabidopsis thaliana	cis-acting element involved in the abscisic acid responsiveness
HORVU.MOREX.r3.1HG0084760.1	ABRE	ACGTG	1085	5	-	Arabidopsis thaliana	cis-acting element involved in the abscisic acid responsiveness
HORVU.MOREX.r3.1HG0084760.1	ABRE	ACGTG	1148	5	-	Arabidopsis thaliana	cis-acting element involved in the abscisic acid responsiveness
HORVU.MOREX.r3.1HG0084760.1	ABRE	ACGTG	1154	5	-	Arabidopsis thaliana	cis-acting element involved in the abscisic acid responsiveness
HORVU.MOREX.r3.1HG0084760.1	ABRE	ACGTG	1423	5	+	Arabidopsis thaliana	cis-acting element involved in the abscisic acid responsiveness
HORVU.MOREX.r3.1HG0084760.1	ABRE	TACGGTC	1958	7	-	Arabidopsis thaliana	cis-acting element involved in the abscisic acid responsiveness
HORVU.MOREX.r3.1HG0084760.1	ABRE	ACGTG	1992	5	+	Arabidopsis thaliana	cis-acting element involved in the abscisic acid responsiveness
HORVU.MOREX.r3.1HG0084760.1	G-box	CACGTC	1085	6	+	Zea mays	cis-acting regulatory element involved in light responsiveness
HORVU.MOREX.r3.1HG0084760.1	G-box	CACGTC	1148	6	+	Zea mays	cis-acting regulatory element involved in light responsiveness
HORVU.MOREX.r3.1HG0084760.1	G-box	CACGTC	1154	6	+	Zea mays	cis-acting regulatory element involved in light responsiveness
HORVU.MOREX.r3.1HG0084760.1	G-box	CACGTC	1991	6	-	Zea mays	cis-acting regulatory element involved in light responsiveness
[truncated: 11,830 more rows]
