# Supplementary material for: Comparative genomics analysis of the MYB gene family in barley: preliminary insights into evolution and biological function in Blue Qingke
Source: PeerJ. 2024 Dec 2;12:e18443. doi: 10.7717/peerj.18443 (PMC11619697; doi:10.7717/peerj.18443)
Supplement: Supplemental Information 9 [file peerj-12-18443-s009.xls]

## Sheet: Sheet1
Table S8 Analysis of promoter region elements of 92 HvMYB genes
Gene name	Gene id	Start	End	Function
HvMYB1	HORVU.MOREX.r3.1HG0017050.1	1697	1717	defense and stress responsiveness
		1214	1234	low-temperature responsiveness
		249	269	abscisic acid responsiveness
		912	932	abscisic acid responsiveness
		1678	1698	cis-acting regulatory element
		1349	1369	circadian control
		248	268	light responsiveness
		911	931	light responsiveness
		117	137	MeJA-responsiveness
		247	267	MeJA-responsiveness
		326	346	MeJA-responsiveness
		479	499	MeJA-responsiveness
		670	690	MeJA-responsiveness
		679	699	MeJA-responsiveness
		974	994	MeJA-responsiveness
		117	137	MeJA-responsiveness
		247	267	MeJA-responsiveness
		326	346	MeJA-responsiveness
		479	499	MeJA-responsiveness
		670	690	MeJA-responsiveness
		679	699	MeJA-responsiveness
		974	994	MeJA-responsiveness
		1253	1273	zein metabolism regulation
		304	324	anoxic specific inducibility
		820	840	light responsiveness
		60	80	light responsiveness
		651	671	light responsiveness
		944	964	light responsiveness
		786	806	MYB binding site involved in light responsiveness
		153	173	MYBHv1 binding site
		1637	1657	MYBHv1 binding site
		130	150	light responsiveness
		1755	1775	light responsiveness
		1582	1602	light responsiveness
		995	1015	light responsiveness
HvMYB2	HORVU.MOREX.r3.1HG0018590.1	584	604	abscisic acid responsiveness
		832	852	abscisic acid responsiveness
		839	859	cis-acting regulatory element
		645	665	auxin responsiveness
		858	878	circadian control
		831	851	light responsiveness
		583	603	light responsiveness
		1353	1373	light responsiveness
		725	745	MeJA-responsiveness
		998	1018	MeJA-responsiveness
		1239	1259	MeJA-responsiveness
		1581	1601	MeJA-responsiveness
		725	745	MeJA-responsiveness
		998	1018	MeJA-responsiveness
		1239	1259	MeJA-responsiveness
		1581	1601	MeJA-responsiveness
		596	616	endosperm expression
		113	133	gibberellin-responsive element
		915	935	gibberellin-responsive element
		199	219	light responsiveness
		200	220	light responsiveness
		1634	1654	light responsiveness
		1371	1391	light responsiveness
		981	1001	MYB binding site involved in drought-inducibility
		1793	1813	MYB binding site involved in drought-inducibility
		1050	1070	MYBHv1 binding site
		1768	1788	light responsiveness
		1282	1302	light responsiveness
		919	939	light responsiveness
HvMYB3	HORVU.MOREX.r3.1HG0025510.1	792	812	salicylic acid responsiveness
		186	206	abscisic acid responsiveness
		389	409	abscisic acid responsiveness
		390	410	abscisic acid responsiveness
		626	646	abscisic acid responsiveness
		1555	1575	abscisic acid responsiveness
		1776	1796	abscisic acid responsiveness
		1777	1797	abscisic acid responsiveness
		1820	1840	abscisic acid responsiveness
		1821	1841	abscisic acid responsiveness
		1456	1476	cis-acting regulatory element
		220	240	anaerobic induction
		771	791	anaerobic induction
		863	883	circadian control
		387	407	light responsiveness
		389	409	light responsiveness
		625	645	light responsiveness
		1554	1574	light responsiveness
		1572	1592	light responsiveness
		1776	1796	light responsiveness
		1820	1840	light responsiveness
		389	409	light responsiveness
		1776	1796	light responsiveness
		1820	1840	light responsiveness
		940	960	MeJA-responsiveness
		1202	1222	MeJA-responsiveness
		1553	1573	MeJA-responsiveness
		940	960	MeJA-responsiveness
		1202	1222	MeJA-responsiveness
		1553	1573	MeJA-responsiveness
		375	395	meristem expression
		1599	1619	gibberellin-responsive element
		607	627	gibberellin-responsive element
		370	390	light responsiveness
		1219	1239	light responsiveness
		1226	1246	MYB binding site involved in drought-inducibility
		777	797	part of a conserved DNA module involved in light responsiveness
HvMYB4	HORVU.MOREX.r3.1HG0031520.1	1991	2011	low-temperature responsiveness
		1185	1205	cis-acting regulatory element
		922	942	MeJA-responsiveness
		1437	1457	MeJA-responsiveness
		922	942	MeJA-responsiveness
		1437	1457	MeJA-responsiveness
		1351	1371	endosperm expression
		928	948	anoxic specific inducibility
		1237	1257	anoxic specific inducibility
		408	428	gibberellin-responsive element
		1670	1690	gibberellin-responsive element
		1589	1609	light responsiveness
		1073	1093	light responsiveness
		1222	1242	MYB binding site involved in drought-inducibility
		1400	1420	light responsiveness
		125	145	light responsiveness
		1161	1181	light responsiveness
		544	564	light responsiveness
HvMYB5	HORVU.MOREX.r3.1HG0043220.1	325	345	auxin-responsive element
		986	1006	gibberellin-responsiveness
		1090	1110	light responsiveness
		1766	1786	low-temperature responsiveness
		776	796	salicylic acid responsiveness
		655	675	abscisic acid responsiveness
		1854	1874	abscisic acid responsiveness
		1863	1883	abscisic acid responsiveness
		1615	1635	cis-acting regulatory element
		1207	1227	anaerobic induction
		1517	1537	anaerobic induction
		1993	2013	anaerobic induction
		681	701	circadian control
		655	675	light responsiveness
		1123	1143	light responsiveness
		1854	1874	light responsiveness
		1863	1883	light responsiveness
		179	199	seed-specific regulation
		385	405	MeJA-responsiveness
		1338	1358	MeJA-responsiveness
		1379	1399	MeJA-responsiveness
		1446	1466	MeJA-responsiveness
		1552	1572	MeJA-responsiveness
		385	405	MeJA-responsiveness
		1338	1358	MeJA-responsiveness
		1379	1399	MeJA-responsiveness
		1446	1466	MeJA-responsiveness
		1552	1572	MeJA-responsiveness
		148	168	zein metabolism regulation
		844	864	zein metabolism regulation
		1886	1906	anoxic specific inducibility
		1640	1660	gibberellin-responsive element
		639	659	light responsiveness
		1926	1946	light responsiveness
		519	539	MYB binding site involved in drought-inducibility
		823	843	MYB binding site involved in drought-inducibility
		431	451	MYBHv1 binding site
		1715	1735	part of a conserved DNA module involved in light responsiveness
HvMYB6	HORVU.MOREX.r3.1HG0054480.1	412	432	cell cycle regulation
		928	948	defense and stress responsiveness
		1715	1735	abscisic acid responsiveness
		103	123	anaerobic induction
		1169	1189	anaerobic induction
		1218	1238	anaerobic induction
		1788	1808	anaerobic induction
		1419	1439	light responsiveness
		84	104	MeJA-responsiveness
		84	104	MeJA-responsiveness
		1745	1765	zein metabolism regulation
		607	627	anoxic specific inducibility
		801	821	gibberellin-responsive element
		167	187	light responsiveness
		1522	1542	MYB binding site involved in drought-inducibility
		169	189	MYB binding site involved in light responsiveness
		413	433	MYBHv1 binding site
		248	268	light responsiveness
		1819	1839	light responsiveness
		1829	1849	light responsiveness
HvMYB7	HORVU.MOREX.r3.1HG0057900.1	65	85	cell cycle regulation
		1509	1529	cell cycle regulation
		1491	1511	light responsiveness
		727	747	salicylic acid responsiveness
		229	249	cis-acting regulatory element
		512	532	anaerobic induction
		861	881	anaerobic induction
		868	888	anaerobic induction
		1038	1058	anaerobic induction
		1593	1613	auxin responsiveness
		1450	1470	circadian control
		1255	1275	MeJA-responsiveness
		1969	1989	MeJA-responsiveness
		1255	1275	MeJA-responsiveness
		1969	1989	MeJA-responsiveness
		1559	1579	zein metabolism regulation
		1898	1918	zein metabolism regulation
		68	88	MYBHv1 binding site
		1511	1531	MYBHv1 binding site
		621	641	light responsiveness
HvMYB8	HORVU.MOREX.r3.1HG0066390.1	84	104	binding site of AT-rich DNA binding protein (ATBP-1)
		167	187	low-temperature responsiveness
		300	320	low-temperature responsiveness
		1355	1375	low-temperature responsiveness
		1718	1738	salicylic acid responsiveness
		152	172	abscisic acid responsiveness
		1051	1071	cis-acting regulatory element
		1062	1082	cis-acting regulatory element
		1251	1271	anaerobic induction
		731	751	circadian control
		152	172	light responsiveness
		366	386	seed-specific regulation
		187	207	MeJA-responsiveness
		187	207	MeJA-responsiveness
		1854	1874	zein metabolism regulation
		303	323	anoxic specific inducibility
		1873	1893	anoxic specific inducibility
		1989	2009	anoxic specific inducibility
		776	796	light responsiveness
		691	711	part of a conserved DNA module involved in light responsiveness
		1676	1696	light responsiveness
		1659	1679	light responsiveness
		1708	1728	light responsiveness
HvMYB9	HORVU.MOREX.r3.1HG0069820.1	1601	1621	light responsiveness
		1200	1220	low-temperature responsiveness
		1485	1505	low-temperature responsiveness
		444	464	abscisic acid responsiveness
		813	833	abscisic acid responsiveness
		815	835	abscisic acid responsiveness
		816	836	abscisic acid responsiveness
		1414	1434	abscisic acid responsiveness
		1604	1624	abscisic acid responsiveness
		423	443	cis-acting regulatory element
		881	901	cis-acting regulatory element
		1228	1248	cis-acting regulatory element
		230	250	anaerobic induction
		1285	1305	anaerobic induction
		443	463	light responsiveness
		815	835	light responsiveness
		1413	1433	light responsiveness
		1587	1607	light responsiveness
		1602	1622	light responsiveness
		1603	1623	light responsiveness
		815	835	light responsiveness
		551	571	MeJA-responsiveness
		1372	1392	MeJA-responsiveness
		551	571	MeJA-responsiveness
		1372	1392	MeJA-responsiveness
		440	460	zein metabolism regulation
		1488	1508	anoxic specific inducibility
		77	97	gibberellin-responsive element
		1945	1965	gibberellin-responsive element
		681	701	gibberellin-responsive element
		978	998	light responsiveness
		1005	1025	light responsiveness
		1144	1164	light responsiveness
		1194	1214	light responsiveness
		314	334	light responsiveness
		1516	1536	protein binding site
HvMYB10	HORVU.MOREX.r3.1HG0073480.1	111	131	auxin-responsive element
		1298	1318	auxin-responsive element
		702	722	defense and stress responsiveness
		1781	1801	low-temperature responsiveness
		734	754	salicylic acid responsiveness
		796	816	salicylic acid responsiveness
		550	570	abscisic acid responsiveness
		553	573	abscisic acid responsiveness
		668	688	abscisic acid responsiveness
		670	690	abscisic acid responsiveness
		1502	1522	abscisic acid responsiveness
		1686	1706	abscisic acid responsiveness
		1991	2011	abscisic acid responsiveness
		974	994	cis-acting regulatory element
		676	696	anaerobic induction
		777	797	anaerobic induction
		1121	1141	anaerobic induction
		1418	1438	anaerobic induction
		1483	1503	anaerobic induction
		1953	1973	anaerobic induction
		552	572	light responsiveness
		1501	1521	light responsiveness
		670	690	light responsiveness
		1990	2010	light responsiveness
		34	54	MeJA-responsiveness
		593	613	MeJA-responsiveness
		1136	1156	MeJA-responsiveness
		1263	1283	MeJA-responsiveness
		1932	1952	MeJA-responsiveness
		1989	2009	MeJA-responsiveness
		34	54	MeJA-responsiveness
		593	613	MeJA-responsiveness
		1136	1156	MeJA-responsiveness
		1263	1283	MeJA-responsiveness
		1932	1952	MeJA-responsiveness
		1989	2009	MeJA-responsiveness
		400	420	zein metabolism regulation
		1511	1531	zein metabolism regulation
		1987	2007	zein metabolism regulation
		336	356	anoxic specific inducibility
		1826	1846	anoxic specific inducibility
		130	150	light responsiveness
		253	273	light responsiveness
		1801	1821	light responsiveness
		1922	1942	light responsiveness
		51	71	MYBHv1 binding site
		198	218	MYBHv1 binding site
		1593	1613	MYBHv1 binding site
		9	29	part of a conserved DNA module involved in light responsiveness
		910	930	part of a conserved DNA module involved in light responsiveness
		926	946	light responsiveness
		1578	1598	light responsiveness
HvMYB11	HORVU.MOREX.r3.1HG0075320.1	960	980	light responsiveness
		677	697	salicylic acid responsiveness
		158	178	abscisic acid responsiveness
		237	257	abscisic acid responsiveness
		239	259	abscisic acid responsiveness
		240	260	abscisic acid responsiveness
		510	530	abscisic acid responsiveness
		771	791	abscisic acid responsiveness
		775	795	abscisic acid responsiveness
		778	798	abscisic acid responsiveness
		1075	1095	abscisic acid responsiveness
		1191	1211	abscisic acid responsiveness
		1426	1446	abscisic acid responsiveness
		1720	1740	abscisic acid responsiveness
		1211	1231	cis-acting regulatory element
		158	178	light responsiveness
		239	259	light responsiveness
		525	545	light responsiveness
		777	797	light responsiveness
		819	839	light responsiveness
		860	880	light responsiveness
		954	974	light responsiveness
		1191	1211	light responsiveness
		1425	1445	light responsiveness
		1719	1739	light responsiveness
		239	259	light responsiveness
		1193	1213	MeJA-responsiveness
		1424	1444	MeJA-responsiveness
		1193	1213	MeJA-responsiveness
		1424	1444	MeJA-responsiveness
		456	476	meristem expression
		1457	1477	gibberellin-responsive element
		1738	1758	light responsiveness
		1787	1807	light responsiveness
		1792	1812	light responsiveness
		748	768	MYBHv1 binding site
		1522	1542	part of a light response element
		355	375	light responsiveness
HvMYB12	HORVU.MOREX.r3.1HG0079700.1	322	342	auxin-responsive element
		11	31	light responsiveness
		1888	1908	light responsiveness
		857	877	low-temperature responsiveness
		14	34	abscisic acid responsiveness
		972	992	abscisic acid responsiveness
		1121	1141	abscisic acid responsiveness
		1122	1142	abscisic acid responsiveness
		1725	1745	abscisic acid responsiveness
		1727	1747	abscisic acid responsiveness
		1775	1795	abscisic acid responsiveness
		396	416	anaerobic induction
		738	758	auxin responsiveness
		13	33	light responsiveness
		1121	1141	light responsiveness
		1727	1747	light responsiveness
		971	991	light responsiveness
		1121	1141	light responsiveness
		66	86	MeJA-responsiveness
		328	348	MeJA-responsiveness
		66	86	MeJA-responsiveness
		328	348	MeJA-responsiveness
		956	976	meristem expression
		430	450	anoxic specific inducibility
		1064	1084	anoxic specific inducibility
		1688	1708	gibberellin-responsive element
		86	106	MYB binding site involved in drought-inducibility
		168	188	MYB binding site involved in drought-inducibility
		1680	1700	MYB binding site involved in drought-inducibility
		531	551	part of a conserved DNA module involved in light responsiveness
		969	989	light responsiveness
		1504	1524	light responsiveness
HvMYB13	HORVU.MOREX.r3.1HG0079760.1	704	724	auxin-responsive element
		873	893	auxin-responsive element
		637	657	light responsiveness
		1575	1595	salicylic acid responsiveness
		199	219	abscisic acid responsiveness
		201	221	abscisic acid responsiveness
		202	222	abscisic acid responsiveness
		489	509	abscisic acid responsiveness
		535	555	abscisic acid responsiveness
		596	616	abscisic acid responsiveness
		633	653	abscisic acid responsiveness
		712	732	abscisic acid responsiveness
		969	989	abscisic acid responsiveness
		1104	1124	abscisic acid responsiveness
		1146	1166	abscisic acid responsiveness
		1448	1468	abscisic acid responsiveness
		1666	1686	abscisic acid responsiveness
		1746	1766	abscisic acid responsiveness
		822	842	cis-acting regulatory element
		1060	1080	cis-acting regulatory element
		1947	1967	cis-acting regulatory element
		21	41	anaerobic induction
		243	263	anaerobic induction
		1243	1263	anaerobic induction
		1920	1940	auxin responsiveness
		201	221	light responsiveness
		489	509	light responsiveness
		535	555	light responsiveness
		632	652	light responsiveness
		1103	1123	light responsiveness
		201	221	light responsiveness
		1145	1165	light responsiveness
		1204	1224	light responsiveness
		1448	1468	light responsiveness
		1666	1686	light responsiveness
		187	207	MeJA-responsiveness
		364	384	MeJA-responsiveness
		1183	1203	MeJA-responsiveness
		1297	1317	MeJA-responsiveness
		187	207	MeJA-responsiveness
		364	384	MeJA-responsiveness
		1183	1203	MeJA-responsiveness
		1297	1317	MeJA-responsiveness
		782	802	meristem expression
		979	999	light responsiveness
		1159	1179	light responsiveness
		86	106	MYB binding site involved in drought-inducibility
		1998	2018	MYB binding site involved in drought-inducibility
		1131	1151	MYBHv1 binding site
		1352	1372	MYBHv1 binding site
		1822	1842	light responsiveness
		1828	1848	light responsiveness
		1834	1854	light responsiveness
		1548	1568	part of a light responsive module
HvMYB14	HORVU.MOREX.r3.1HG0084760.1	212	232	auxin-responsive element
		1519	1539	auxin-responsive element
		563	583	defense and stress responsiveness
		718	738	defense and stress responsiveness
		1330	1350	low-temperature responsiveness
		736	756	abscisic acid responsiveness
		1075	1095	abscisic acid responsiveness
		1138	1158	abscisic acid responsiveness
		1144	1164	abscisic acid responsiveness
		1413	1433	abscisic acid responsiveness
		1948	1968	abscisic acid responsiveness
		1982	2002	abscisic acid responsiveness
		1133	1153	cis-acting regulatory element
		1229	1249	cis-acting regulatory element
		401	421	anaerobic induction
		729	749	anaerobic induction
		973	993	anaerobic induction
		1572	1592	anaerobic induction
		1075	1095	light responsiveness
		1138	1158	light responsiveness
		1144	1164	light responsiveness
		1981	2001	light responsiveness
		736	756	light responsiveness
		1412	1432	light responsiveness
		851	871	seed-specific regulation
		884	904	seed-specific regulation
		888	908	seed-specific regulation
		892	912	seed-specific regulation
		1060	1080	seed-specific regulation
		1146	1166	MeJA-responsiveness
		1157	1177	MeJA-responsiveness
		1146	1166	MeJA-responsiveness
		1157	1177	MeJA-responsiveness
		1889	1909	endosperm expression
		1717	1737	anoxic specific inducibility
		608	628	MYBHv1 binding site
		1460	1480	part of a conserved DNA module involved in light responsiveness
		134	154	light responsiveness
		272	292	light responsiveness
HvMYB15	HORVU.MOREX.r3.1HG0089600.1	1402	1422	auxin-responsive element
		269	289	salicylic acid responsiveness
		1578	1598	salicylic acid responsiveness
		162	182	abscisic acid responsiveness
		1108	1128	abscisic acid responsiveness
		1035	1055	cis-acting regulatory element
		613	633	anaerobic induction
		1964	1984	anaerobic induction
		162	182	light responsiveness
		975	995	light responsiveness
		1108	1128	light responsiveness
		164	184	MeJA-responsiveness
		164	184	MeJA-responsiveness
		102	122	zein metabolism regulation
		260	280	zein metabolism regulation
		835	855	zein metabolism regulation
		121	141	meristem expression
		1091	1111	meristem expression
		200	220	gibberellin-responsive element
		1020	1040	light responsiveness
		1867	1887	light responsiveness
		849	869	light responsiveness
		1116	1136	MYBHv1 binding site
		81	101	light responsiveness
		1439	1459	light responsiveness
		261	281	light responsiveness
HvMYB16	HORVU.MOREX.r3.1HG0089650.1	795	815	abscisic acid responsiveness
		1052	1072	abscisic acid responsiveness
		1140	1160	abscisic acid responsiveness
		1180	1200	abscisic acid responsiveness
		1715	1735	cis-acting regulatory element
		708	728	anaerobic induction
		215	235	circadian control
		1139	1159	light responsiveness
		1180	1200	light responsiveness
		795	815	light responsiveness
		1582	1602	light responsiveness
		616	636	seed-specific regulation
		669	689	seed-specific regulation
		914	934	seed-specific regulation
		918	938	seed-specific regulation
		1046	1066	seed-specific regulation
		1050	1070	seed-specific regulation
		1224	1244	seed-specific regulation
		1306	1326	seed-specific regulation
		1310	1330	seed-specific regulation
		1376	1396	seed-specific regulation
		1639	1659	seed-specific regulation
		1696	1716	MeJA-responsiveness
		1844	1864	MeJA-responsiveness
		1696	1716	MeJA-responsiveness
		1844	1864	MeJA-responsiveness
		630	650	zein metabolism regulation
		130	150	anoxic specific inducibility
		1724	1744	gibberellin-responsive element
		370	390	light responsiveness
		150	170	light responsiveness
		151	171	light responsiveness
		1872	1892	light responsiveness
		1919	1939	light responsiveness
		1541	1561	MYB binding site involved in drought-inducibility
		25	45	MYBHv1 binding site
		67	87	MYBHv1 binding site
		386	406	part of a conserved DNA module involved in light responsiveness
		411	431	part of a conserved DNA module involved in light responsiveness
		474	494	part of a conserved DNA module involved in light responsiveness
		90	110	light responsiveness
		204	224	light responsiveness
HvMYB17	HORVU.MOREX.r3.1HG0089660.1	172	192	auxin-responsive element
		1899	1919	auxin-responsive element
		1645	1665	low-temperature responsiveness
		798	818	salicylic acid responsiveness
		282	302	abscisic acid responsiveness
		520	540	abscisic acid responsiveness
		1316	1336	abscisic acid responsiveness
		507	527	auxin responsiveness
		281	301	light responsiveness
		1315	1335	light responsiveness
		520	540	light responsiveness
		735	755	MeJA-responsiveness
		1571	1591	MeJA-responsiveness
		735	755	MeJA-responsiveness
		1571	1591	MeJA-responsiveness
		1080	1100	zein metabolism regulation
		1538	1558	zein metabolism regulation
		558	578	anoxic specific inducibility
		702	722	anoxic specific inducibility
		265	285	light responsiveness
		553	573	light responsiveness
		1075	1095	MYBHv1 binding site
		143	163	part of a conserved DNA module involved in light responsiveness
		658	678	light responsiveness
		644	664	light responsiveness
		28	48	light responsiveness
		484	504	light responsiveness
		1777	1797	light responsiveness
HvMYB18	HORVU.MOREX.r3.1HG0091990.1	1526	1546	defense and stress responsiveness
		908	928	low-temperature responsiveness
		1674	1694	low-temperature responsiveness
		271	291	abscisic acid responsiveness
		272	292	abscisic acid responsiveness
		590	610	abscisic acid responsiveness
		746	766	anaerobic induction
		1029	1049	anaerobic induction
		270	290	light responsiveness
		271	291	light responsiveness
		271	291	light responsiveness
		2004	2024	MeJA-responsiveness
		2004	2024	MeJA-responsiveness
		888	908	gibberellin-responsive element
		1666	1686	gibberellin-responsive element
		312	332	light responsiveness
		1494	1514	light responsiveness
		27	47	MYB binding site involved in drought-inducibility
		915	935	part of a conserved DNA module involved in light responsiveness
HvMYB19	HORVU.MOREX.r3.2HG0104540.1	1239	1259	salicylic acid responsiveness
		1081	1101	abscisic acid responsiveness
		1082	1102	abscisic acid responsiveness
		1124	1144	abscisic acid responsiveness
		1329	1349	abscisic acid responsiveness
		472	492	anaerobic induction
		1512	1532	anaerobic induction
		1081	1101	light responsiveness
		290	310	light responsiveness
		1081	1101	light responsiveness
		1121	1141	light responsiveness
		1123	1143	light responsiveness
		1328	1348	light responsiveness
		656	676	zein metabolism regulation
		1556	1576	zein metabolism regulation
		192	212	endosperm expression
		1452	1472	anoxic specific inducibility
		182	202	gibberellin-responsive element
		331	351	gibberellin-responsive element
		78	98	light responsiveness
		1596	1616	MYB binding site involved in drought-inducibility
		1414	1434	light responsiveness
		309	329	light responsiveness
		1292	1312	light responsiveness
		617	637	light responsiveness
		1945	1965	light responsiveness
HvMYB20	HORVU.MOREX.r3.2HG0121480.1	771	791	auxin-responsive element
		776	796	low-temperature responsiveness
		292	312	abscisic acid responsiveness
		293	313	abscisic acid responsiveness
		494	514	abscisic acid responsiveness
		1139	1159	abscisic acid responsiveness
		1173	1193	abscisic acid responsiveness
		1177	1197	abscisic acid responsiveness
		1567	1587	abscisic acid responsiveness
		292	312	light responsiveness
		493	513	light responsiveness
		292	312	light responsiveness
		1139	1159	light responsiveness
		1176	1196	light responsiveness
		1567	1587	light responsiveness
		1619	1639	light responsiveness
		1134	1154	MeJA-responsiveness
		1134	1154	MeJA-responsiveness
		54	74	zein metabolism regulation
		287	307	meristem expression
		1466	1486	anoxic specific inducibility
		1817	1837	anoxic specific inducibility
		1920	1940	light responsiveness
		1625	1645	MYB binding site involved in drought-inducibility
		229	249	MYB binding site involved in light responsiveness
		541	561	MYBHv1 binding site
		581	601	part of a conserved DNA module involved in light responsiveness
		669	689	light responsiveness
		703	723	light responsiveness
		354	374	protein binding site
HvMYB21	HORVU.MOREX.r3.2HG0135680.1	740	760	auxin-responsive element
		1877	1897	defense and stress responsiveness
		1333	1353	low-temperature responsiveness
		53	73	abscisic acid responsiveness
		713	733	abscisic acid responsiveness
		715	735	abscisic acid responsiveness
		716	736	abscisic acid responsiveness
		777	797	abscisic acid responsiveness
		778	798	abscisic acid responsiveness
		809	829	abscisic acid responsiveness
		1739	1759	abscisic acid responsiveness
		732	752	cis-acting regulatory element
		784	804	cis-acting regulatory element
		905	925	cis-acting regulatory element
		1414	1434	cis-acting regulatory element
		1658	1678	cis-acting regulatory element
		1861	1881	cis-acting regulatory element
		202	222	anaerobic induction
		618	638	anaerobic induction
		715	735	light responsiveness
		777	797	light responsiveness
		809	829	light responsiveness
		1739	1759	light responsiveness
		52	72	light responsiveness
		715	735	light responsiveness
		777	797	light responsiveness
		774	794	MeJA-responsiveness
		774	794	MeJA-responsiveness
		409	429	meristem expression
		675	695	anoxic specific inducibility
		908	928	anoxic specific inducibility
		1589	1609	light responsiveness
		544	564	MYBHv1 binding site
		625	645	MYBHv1 binding site
		640	660	MYBHv1 binding site
		1295	1315	MYBHv1 binding site
		1644	1664	MYBHv1 binding site
		855	875	part of a conserved DNA module involved in light responsiveness
HvMYB22	HORVU.MOREX.r3.2HG0144990.1	1443	1463	light responsiveness
		29	49	abscisic acid responsiveness
		846	866	abscisic acid responsiveness
		1445	1465	abscisic acid responsiveness
		1637	1657	cis-acting regulatory element
		379	399	anaerobic induction
		28	48	light responsiveness
		1442	1462	light responsiveness
		1445	1465	light responsiveness
		954	974	MeJA-responsiveness
		1321	1341	MeJA-responsiveness
		1690	1710	MeJA-responsiveness
		954	974	MeJA-responsiveness
		1321	1341	MeJA-responsiveness
		1690	1710	MeJA-responsiveness
		677	697	light responsiveness
		678	698	light responsiveness
		1075	1095	light responsiveness
		1521	1541	light responsiveness
		1088	1108	MYB binding site involved in drought-inducibility
		490	510	MYBHv1 binding site
		763	783	MYBHv1 binding site
		1325	1345	light responsiveness
		315	335	light responsiveness
		1739	1759	light responsiveness
HvMYB23	HORVU.MOREX.r3.2HG0184160.1	1537	1557	binding site of AT-rich DNA binding protein (ATBP-1)
		1204	1224	defense and stress responsiveness
		1282	1302	abscisic acid responsiveness
		1445	1465	abscisic acid responsiveness
		1857	1877	abscisic acid responsiveness
		1837	1857	cis-acting regulatory element
		26	46	anaerobic induction
		1466	1486	anaerobic induction
		384	404	circadian control
		1444	1464	light responsiveness
		1281	1301	light responsiveness
		1857	1877	light responsiveness
		1270	1290	MeJA-responsiveness
		1718	1738	MeJA-responsiveness
		1270	1290	MeJA-responsiveness
		1718	1738	MeJA-responsiveness
		1896	1916	light responsiveness
		1602	1622	MYB binding site involved in drought-inducibility
		1612	1632	MYBHv1 binding site
		1762	1782	MYBHv1 binding site
		105	125	light responsiveness
		1643	1663	light responsiveness
		902	922	light responsiveness
		873	893	light responsiveness
HvMYB24	HORVU.MOREX.r3.2HG0197540.1	690	710	abscisic acid responsiveness
		701	721	abscisic acid responsiveness
		1546	1566	abscisic acid responsiveness
		1895	1915	abscisic acid responsiveness
		398	418	cis-acting regulatory element
		1135	1155	cis-acting regulatory element
		1425	1445	cis-acting regulatory element
		1713	1733	cis-acting regulatory element
		1717	1737	cis-acting regulatory element
		1721	1741	cis-acting regulatory element
		1863	1883	cis-acting regulatory element
		778	798	anaerobic induction
		374	394	auxin responsiveness
		689	709	light responsiveness
		700	720	light responsiveness
		1546	1566	light responsiveness
		1554	1574	light responsiveness
		1895	1915	light responsiveness
		898	918	MeJA-responsiveness
		898	918	MeJA-responsiveness
		1724	1744	anoxic specific inducibility
		2000	2020	anoxic specific inducibility
		1247	1267	gibberellin-responsive element
		1440	1460	light responsiveness
		1535	1555	light responsiveness
		531	551	MYB binding site involved in drought-inducibility
		650	670	MYB binding site involved in drought-inducibility
		749	769	MYB binding site involved in drought-inducibility
		1264	1284	light responsiveness
		1262	1282	light responsiveness
HvMYB25	HORVU.MOREX.r3.2HG0210870.1	1871	1891	defense and stress responsiveness
		1975	1995	low-temperature responsiveness
		35	55	salicylic acid responsiveness
		1092	1112	abscisic acid responsiveness
		1609	1629	abscisic acid responsiveness
		1283	1303	anaerobic induction
		1092	1112	light responsiveness
		1700	1720	light responsiveness
		1092	1112	light responsiveness
		961	981	MeJA-responsiveness
		961	981	MeJA-responsiveness
		401	421	meristem expression
		524	544	gibberellin-responsive element
		1513	1533	gibberellin-responsive element
		1828	1848	gibberellin-responsive element
		235	255	light responsiveness
		350	370	MYB binding site involved in drought-inducibility
		790	810	MYB binding site involved in drought-inducibility
		1125	1145	MYB binding site involved in drought-inducibility
		1764	1784	MYB binding site involved in drought-inducibility
		1374	1394	light responsiveness
HvMYB26	HORVU.MOREX.r3.3HG0222330.1	1057	1077	auxin-responsive element
		828	848	defense and stress responsiveness
		1594	1614	salicylic acid responsiveness
		1693	1713	salicylic acid responsiveness
		1775	1795	salicylic acid responsiveness
		1782	1802	zein metabolism regulation
		1787	1807	zein metabolism regulation
		1792	1812	zein metabolism regulation
		1797	1817	zein metabolism regulation
		1414	1434	meristem expression
		324	344	gibberellin-responsive element
		1265	1285	gibberellin-responsive element
		284	304	light responsiveness
		285	305	light responsiveness
		114	134	MYB binding site involved in drought-inducibility
		655	675	MYB binding site involved in drought-inducibility
		766	786	MYB binding site involved in light responsiveness
		173	193	part of a conserved DNA module involved in light responsiveness
		355	375	part of a conserved DNA module involved in light responsiveness
		616	636	part of a conserved DNA module involved in light responsiveness
		1145	1165	light responsiveness
		1440	1460	light responsiveness
		1830	1850	light responsiveness
		1025	1045	light responsiveness
		1252	1272	light responsiveness
		201	221	protein binding site
HvMYB27	HORVU.MOREX.r3.3HG0222600.1	1366	1386	low-temperature responsiveness
		396	416	salicylic acid responsiveness
		1406	1426	abscisic acid responsiveness
		1493	1513	abscisic acid responsiveness
		1654	1674	abscisic acid responsiveness
		1996	2016	abscisic acid responsiveness
		701	721	cis-acting regulatory element
		30	50	anaerobic induction
		1053	1073	anaerobic induction
		1370	1390	anaerobic induction
		1405	1425	light responsiveness
		1493	1513	light responsiveness
		1693	1713	light responsiveness
		1996	2016	light responsiveness
		1667	1687	seed-specific regulation
		1863	1883	seed-specific regulation
		1404	1424	MeJA-responsiveness
		1404	1424	MeJA-responsiveness
		960	980	zein metabolism regulation
		127	147	endosperm expression
		424	444	gibberellin-responsive element
		514	534	light responsiveness
		906	926	light responsiveness
		1553	1573	MYB binding site involved in drought-inducibility
		1385	1405	MYBHv1 binding site
		1441	1461	MYBHv1 binding site
		1933	1953	part of a conserved DNA module array (CMA3)
		91	111	part of a conserved DNA module involved in light responsiveness
		1111	1131	part of a conserved DNA module involved in light responsiveness
		1933	1953	light responsiveness
		428	448	light responsiveness
HvMYB28	HORVU.MOREX.r3.3HG0228120.1	402	422	auxin-responsive element
		1213	1233	defense and stress responsiveness
		512	532	low-temperature responsiveness
		703	723	low-temperature responsiveness
		819	839	salicylic acid responsiveness
		1348	1368	salicylic acid responsiveness
		378	398	abscisic acid responsiveness
		562	582	abscisic acid responsiveness
		1185	1205	abscisic acid responsiveness
		1435	1455	abscisic acid responsiveness
		1269	1289	anaerobic induction
		527	547	circadian control
		229	249	light responsiveness
		1185	1205	light responsiveness
		1434	1454	light responsiveness
		377	397	light responsiveness
		562	582	light responsiveness
		1032	1052	MeJA-responsiveness
		1595	1615	MeJA-responsiveness
		1604	1624	MeJA-responsiveness
		1791	1811	MeJA-responsiveness
		1967	1987	MeJA-responsiveness
		1032	1052	MeJA-responsiveness
		1595	1615	MeJA-responsiveness
		1604	1624	MeJA-responsiveness
		1791	1811	MeJA-responsiveness
		1967	1987	MeJA-responsiveness
		1368	1388	zein metabolism regulation
		1413	1433	zein metabolism regulation
		14	34	anoxic specific inducibility
		628	648	gibberellin-responsive element
		720	740	gibberellin-responsive element
		1999	2019	light responsiveness
		138	158	MYB binding site involved in drought-inducibility
		1912	1932	MYB binding site involved in drought-inducibility
		964	984	MYB binding site involved in light responsiveness
		1077	1097	MYBHv1 binding site
		1474	1494	part of a conserved DNA module involved in light responsiveness
		1327	1347	part of a light response element
		642	662	light responsiveness
		1888	1908	light responsiveness
		1971	1991	light responsiveness
HvMYB29	HORVU.MOREX.r3.3HG0228140.1	185	205	defense and stress responsiveness
		1615	1635	low-temperature responsiveness
		1070	1090	salicylic acid responsiveness
		416	436	abscisic acid responsiveness
		1532	1552	abscisic acid responsiveness
		1533	1553	abscisic acid responsiveness
		1632	1652	abscisic acid responsiveness
		121	141	anaerobic induction
		1501	1521	anaerobic induction
		1532	1552	light responsiveness
		1247	1267	light responsiveness
		1532	1552	light responsiveness
		247	267	MeJA-responsiveness
		1603	1623	MeJA-responsiveness
		1719	1739	MeJA-responsiveness
		247	267	MeJA-responsiveness
		1603	1623	MeJA-responsiveness
		1719	1739	MeJA-responsiveness
		603	623	endosperm expression
		1660	1680	anoxic specific inducibility
		111	131	gibberellin-responsive element
		413	433	light responsiveness
		414	434	light responsiveness
		1619	1639	light responsiveness
		861	881	part of a conserved DNA module involved in light responsiveness
		1807	1827	light responsiveness
		627	647	light responsiveness
HvMYB30	HORVU.MOREX.r3.3HG0234110.1	1439	1459	salicylic acid responsiveness
		1095	1115	abscisic acid responsiveness
		1096	1116	abscisic acid responsiveness
		1095	1115	light responsiveness
		1095	1115	light responsiveness
		1237	1257	seed-specific regulation
		1663	1683	seed-specific regulation
		1791	1811	meristem expression
		1422	1442	gibberellin-responsive element
		1533	1553	gibberellin-responsive element
		21	41	light responsiveness
		197	217	light responsiveness
		1918	1938	MYB binding site involved in drought-inducibility
		415	435	MYB binding site involved in light responsiveness
		491	511	part of a conserved DNA module involved in light responsiveness
		1597	1617	part of a conserved DNA module involved in light responsiveness
		1814	1834	part of a conserved DNA module involved in light responsiveness
		279	299	light responsiveness
		224	244	light responsiveness
HvMYB31	HORVU.MOREX.r3.3HG0236520.1	343	363	auxin-responsive element
		1088	1108	salicylic acid responsiveness
		112	132	abscisic acid responsiveness
		985	1005	abscisic acid responsiveness
		79	99	anaerobic induction
		675	695	anaerobic induction
		1978	1998	anaerobic induction
		420	440	circadian control
		985	1005	light responsiveness
		112	132	light responsiveness
		128	148	MeJA-responsiveness
		1014	1034	MeJA-responsiveness
		1666	1686	MeJA-responsiveness
		128	148	MeJA-responsiveness
		1014	1034	MeJA-responsiveness
		1666	1686	MeJA-responsiveness
		1912	1932	zein metabolism regulation
		329	349	differentiation of the palisade mesophyll cells
		1856	1876	anoxic specific inducibility
		1902	1922	anoxic specific inducibility
		1570	1590	light responsiveness
		1572	1592	light responsiveness
		1235	1255	MYBHv1 binding site
		688	708	part of a conserved DNA module involved in light responsiveness
		1227	1247	light responsiveness
		1921	1941	light responsiveness
		1786	1806	light responsiveness
		1219	1239	part of gapA in (gapA-CMA1) involved with light responsiveness
HvMYB32	HORVU.MOREX.r3.3HG0236690.1	1712	1732	anaerobic induction
		1551	1571	defense and stress responsiveness
		560	580	low-temperature responsiveness
		235	255	abscisic acid responsiveness
		646	666	abscisic acid responsiveness
		834	854	abscisic acid responsiveness
		1059	1079	abscisic acid responsiveness
		1206	1226	abscisic acid responsiveness
		798	818	cis-acting regulatory element
		920	940	cis-acting regulatory element
		951	971	cis-acting regulatory element
		235	255	light responsiveness
		642	662	light responsiveness
		645	665	light responsiveness
		834	854	light responsiveness
		1059	1079	light responsiveness
		1205	1225	light responsiveness
		411	431	MeJA-responsiveness
		1241	1261	MeJA-responsiveness
		411	431	MeJA-responsiveness
		1241	1261	MeJA-responsiveness
		145	165	meristem expression
		886	906	meristem expression
		123	143	common cis-acting element in promoter and enhancer regions
		150	170	common cis-acting element in promoter and enhancer regions
		498	518	common cis-acting element in promoter and enhancer regions
		1319	1339	common cis-acting element in promoter and enhancer regions
		1337	1357	common cis-acting element in promoter and enhancer regions
		1704	1724	common cis-acting element in promoter and enhancer regions
		45	65	core promoter element around -30 of transcription start
		164	184	core promoter element around -30 of transcription start
		547	567	core promoter element around -30 of transcription start
		548	568	core promoter element around -30 of transcription start
		589	609	core promoter element around -30 of transcription start
		591	611	core promoter element around -30 of transcription start
		597	617	core promoter element around -30 of transcription start
		598	618	core promoter element around -30 of transcription start
		599	619	core promoter element around -30 of transcription start
		670	690	core promoter element around -30 of transcription start
		1122	1142	core promoter element around -30 of transcription start
		1123	1143	core promoter element around -30 of transcription start
		1124	1144	core promoter element around -30 of transcription start
		1537	1557	core promoter element around -30 of transcription start
		1538	1558	core promoter element around -30 of transcription start
		1539	1559	core promoter element around -30 of transcription start
		1541	1561	core promoter element around -30 of transcription start
		917	937	enhancer-like element involved in anoxic specific inducibility
		1743	1763	enhancer-like element involved in anoxic specific inducibility
		1976	1996	enhancer-like element involved in anoxic specific inducibility
		724	744	light responsive element
		802	822	light responsive element
		1746	1766	light responsive element
		1949	1969	MYB binding site involved in drought-inducibility
		960	980	MYBHv1 binding site
		1979	1999	MYBHv1 binding site
		1390	1410	light responsiveness
		1392	1412	light responsiveness
		113	133	light responsiveness
		1665	1685	light responsiveness
		1807	1827	light responsiveness
		328	348	short_function
		365	385	short_function
		402	422	short_function
		419	439	short_function
		956	976	short_function
		1253	1273	short_function
		1315	1335	short_function
		1420	1440	short_function
		1456	1476	short_function
		1562	1582	short_function
		1569	1589	short_function
		1687	1707	short_function
		1756	1776	short_function
		1841	1861	short_function
		1958	1978	short_function
HvMYB33	HORVU.MOREX.r3.3HG0236900.1	1131	1151	low-temperature responsiveness
		575	595	salicylic acid responsiveness
		1789	1809	salicylic acid responsiveness
		845	865	cis-acting regulatory element
		1543	1563	light responsiveness
		865	885	endosperm expression
		1220	1240	endosperm expression
		1740	1760	light responsiveness
		546	566	MYB binding site involved in drought-inducibility
		1667	1687	MYB binding site involved in drought-inducibility
		816	836	dehydration, low-temp, salt stresses
		1325	1345	abscisic acid responsiveness
		1340	1360	abscisic acid responsiveness
		1543	1563	abscisic acid responsiveness
		1544	1564	abscisic acid responsiveness
		627	647	light responsiveness
		1324	1344	light responsiveness
		1340	1360	light responsiveness
		1543	1563	light responsiveness
		569	589	MeJA-responsiveness
		1087	1107	MeJA-responsiveness
		569	589	MeJA-responsiveness
		1087	1107	MeJA-responsiveness
		128	148	common cis-acting element in promoter and enhancer regions
		246	266	common cis-acting element in promoter and enhancer regions
		496	516	common cis-acting element in promoter and enhancer regions
		596	616	common cis-acting element in promoter and enhancer regions
		1041	1061	common cis-acting element in promoter and enhancer regions
		1043	1063	common cis-acting element in promoter and enhancer regions
		1078	1098	common cis-acting element in promoter and enhancer regions
		1390	1410	common cis-acting element in promoter and enhancer regions
		170	190	core promoter element around -30 of transcription start
		171	191	core promoter element around -30 of transcription start
		556	576	core promoter element around -30 of transcription start
		1348	1368	core promoter element around -30 of transcription start
		1467	1487	core promoter element around -30 of transcription start
		1583	1603	core promoter element around -30 of transcription start
		1584	1604	core promoter element around -30 of transcription start
		1605	1625	core promoter element around -30 of transcription start
		1606	1626	core promoter element around -30 of transcription start
		1607	1627	core promoter element around -30 of transcription start
		1608	1628	core promoter element around -30 of transcription start
		1634	1654	core promoter element around -30 of transcription start
		1646	1666	core promoter element around -30 of transcription start
		1657	1677	core promoter element around -30 of transcription start
		1658	1678	core promoter element around -30 of transcription start
		1675	1695	core promoter element around -30 of transcription start
		1459	1479	element for maximal elicitor-mediated activation (2copies)
		848	868	enhancer-like element involved in anoxic specific inducibility
		25	45	gibberellin-responsive element
		1681	1701	light responsive element
		1682	1702	light responsive element
		983	1003	MYBHv1 binding site
		1865	1885	light responsiveness
		515	535	light responsiveness
		36	56	short_function
		290	310	short_function
		355	375	short_function
		413	433	short_function
		417	437	short_function
		428	448	short_function
		551	571	short_function
		576	596	short_function
		652	672	short_function
		921	941	short_function
		966	986	short_function
		1289	1309	short_function
		1321	1341	short_function
		1494	1514	short_function
		1499	1519	short_function
		1519	1539	short_function
		1527	1547	short_function
		1864	1884	short_function
		1874	1894	short_function
		1880	1900	short_function
		1980	2000	short_function
HvMYB34	HORVU.MOREX.r3.3HG0248740.1	680	700	auxin-responsive element
		1004	1024	low-temperature responsiveness
		1394	1414	salicylic acid responsiveness
		1098	1118	cis-acting regulatory element
		863	883	MeJA-responsiveness
		863	883	MeJA-responsiveness
		1363	1383	meristem expression
		1423	1443	gibberellin-responsive element
		210	230	gibberellin-responsive element
		1177	1197	light responsiveness
		723	743	light responsiveness
HvMYB35	HORVU.MOREX.r3.3HG0264850.1	524	544	auxin-responsive element
		538	558	auxin-responsive element
		505	525	gibberellin-responsiveness
		17	37	abscisic acid responsiveness
		955	975	cis-acting regulatory element
		1335	1355	cis-acting regulatory element
		1993	2013	cis-acting regulatory element
		1011	1031	anaerobic induction
		330	350	circadian control
		696	716	light responsiveness
		949	969	light responsiveness
		16	36	light responsiveness
		152	172	MeJA-responsiveness
		414	434	MeJA-responsiveness
		720	740	MeJA-responsiveness
		152	172	MeJA-responsiveness
		414	434	MeJA-responsiveness
		720	740	MeJA-responsiveness
		1515	1535	zein metabolism regulation
		1767	1787	meristem expression
		796	816	anoxic specific inducibility
		1681	1701	anoxic specific inducibility
		1818	1838	light responsiveness
		772	792	light responsiveness
		813	833	light responsiveness
		833	853	light responsiveness
		387	407	MYB binding site involved in drought-inducibility
		1315	1335	MYB binding site involved in light responsiveness
		1700	1720	MYBHv1 binding site
		372	392	part of a conserved DNA module involved in light responsiveness
		1633	1653	part of a conserved DNA module involved in light responsiveness
		1015	1035	light responsiveness
		746	766	light responsiveness
		570	590	light responsiveness
		1246	1266	light responsiveness
HvMYB36	HORVU.MOREX.r3.3HG0274520.1	1363	1383	auxin-responsive element
		271	291	light responsiveness
		316	336	light responsiveness
		1692	1712	low-temperature responsiveness
		377	397	salicylic acid responsiveness
		1644	1664	salicylic acid responsiveness
		1909	1929	salicylic acid responsiveness
		126	146	abscisic acid responsiveness
		159	179	abscisic acid responsiveness
		1117	1137	abscisic acid responsiveness
		1125	1145	abscisic acid responsiveness
		1159	1179	abscisic acid responsiveness
		1189	1209	abscisic acid responsiveness
		1205	1225	abscisic acid responsiveness
		1348	1368	abscisic acid responsiveness
		1349	1369	abscisic acid responsiveness
		1495	1515	abscisic acid responsiveness
		1496	1516	abscisic acid responsiveness
		1827	1847	abscisic acid responsiveness
		1828	1848	abscisic acid responsiveness
		687	707	anaerobic induction
		1038	1058	anaerobic induction
		1659	1679	anaerobic induction
		158	178	light responsiveness
		1125	1145	light responsiveness
		1188	1208	light responsiveness
		1348	1368	light responsiveness
		1827	1847	light responsiveness
		1117	1137	light responsiveness
		1205	1225	light responsiveness
		1348	1368	light responsiveness
		1495	1515	light responsiveness
		1827	1847	light responsiveness
		1673	1693	seed-specific regulation
		255	275	MeJA-responsiveness
		544	564	MeJA-responsiveness
		1506	1526	MeJA-responsiveness
		255	275	MeJA-responsiveness
		544	564	MeJA-responsiveness
		1506	1526	MeJA-responsiveness
		1431	1451	zein metabolism regulation
		1308	1328	meristem expression
		637	657	anoxic specific inducibility
		1611	1631	light responsiveness
		1856	1876	light responsiveness
		31	51	MYB binding site involved in drought-inducibility
		478	498	MYB binding site involved in drought-inducibility
		1398	1418	MYB binding site involved in drought-inducibility
		1923	1943	MYB binding site involved in drought-inducibility
		136	156	MYBHv1 binding site
HvMYB37	HORVU.MOREX.r3.3HG0280840.1	303	323	light responsiveness
		89	109	low-temperature responsiveness
		735	755	low-temperature responsiveness
		1266	1286	low-temperature responsiveness
		1480	1500	low-temperature responsiveness
		1588	1608	abscisic acid responsiveness
		1233	1253	cis-acting regulatory element
		283	303	anaerobic induction
		1528	1548	anaerobic induction
		1856	1876	auxin responsiveness
		506	526	light responsiveness
		979	999	light responsiveness
		1873	1893	light responsiveness
		150	170	light responsiveness
		580	600	seed-specific regulation
		804	824	seed-specific regulation
		1045	1065	seed-specific regulation
		713	733	MeJA-responsiveness
		876	896	MeJA-responsiveness
		904	924	MeJA-responsiveness
		1093	1113	MeJA-responsiveness
		1176	1196	MeJA-responsiveness
		1443	1463	MeJA-responsiveness
		713	733	MeJA-responsiveness
		876	896	MeJA-responsiveness
		904	924	MeJA-responsiveness
		1093	1113	MeJA-responsiveness
		1176	1196	MeJA-responsiveness
		1443	1463	MeJA-responsiveness
		670	690	endosperm expression
		1419	1439	anoxic specific inducibility
		1477	1497	anoxic specific inducibility
		297	317	gibberellin-responsive element
		575	595	light responsiveness
		1942	1962	light responsiveness
		925	945	MYB binding site involved in drought-inducibility
		1004	1024	MYB binding site involved in drought-inducibility
		1060	1080	MYB binding site involved in drought-inducibility
		1109	1129	MYB binding site involved in drought-inducibility
		210	230	MYBHv1 binding site
		1291	1311	part of a light response element
		1998	2018	light responsiveness
		371	391	light responsiveness
HvMYB38	HORVU.MOREX.r3.3HG0283250.1	281	301	abscisic acid responsiveness
		1007	1027	abscisic acid responsiveness
		1096	1116	abscisic acid responsiveness
		1184	1204	abscisic acid responsiveness
		1341	1361	abscisic acid responsiveness
		1819	1839	abscisic acid responsiveness
		1822	1842	abscisic acid responsiveness
		1246	1266	cis-acting regulatory element
		151	171	anaerobic induction
		621	641	auxin responsiveness
		280	300	light responsiveness
		239	259	light responsiveness
		804	824	light responsiveness
		1007	1027	light responsiveness
		1183	1203	light responsiveness
		1821	1841	light responsiveness
		174	194	MeJA-responsiveness
		230	250	MeJA-responsiveness
		715	735	MeJA-responsiveness
		890	910	MeJA-responsiveness
		1337	1357	MeJA-responsiveness
		1340	1360	MeJA-responsiveness
		1413	1433	MeJA-responsiveness
		1927	1947	MeJA-responsiveness
		174	194	MeJA-responsiveness
		230	250	MeJA-responsiveness
		715	735	MeJA-responsiveness
		890	910	MeJA-responsiveness
		1337	1357	MeJA-responsiveness
		1340	1360	MeJA-responsiveness
		1413	1433	MeJA-responsiveness
		1927	1947	MeJA-responsiveness
		791	811	zein metabolism regulation
		644	664	meristem expression
		1810	1830	anoxic specific inducibility
		1987	2007	light responsiveness
		1991	2011	light responsiveness
		1995	2015	light responsiveness
		1999	2019	light responsiveness
		226	246	MYB binding site involved in drought-inducibility
		779	799	MYBHv1 binding site
		1271	1291	light responsiveness
		1643	1663	light responsiveness
HvMYB39	HORVU.MOREX.r3.3HG0284070.1	1302	1322	defense and stress responsiveness
		353	373	abscisic acid responsiveness
		359	379	abscisic acid responsiveness
		444	464	abscisic acid responsiveness
		485	505	abscisic acid responsiveness
		785	805	abscisic acid responsiveness
		1771	1791	abscisic acid responsiveness
		310	330	anaerobic induction
		860	880	anaerobic induction
		1275	1295	anaerobic induction
		784	804	light responsiveness
		352	372	light responsiveness
		358	378	light responsiveness
		443	463	light responsiveness
		485	505	light responsiveness
		1885	1905	seed-specific regulation
		1413	1433	MeJA-responsiveness
		1413	1433	MeJA-responsiveness
		1924	1944	zein metabolism regulation
		1450	1470	meristem expression
		1456	1476	meristem expression
		1722	1742	meristem expression
		1779	1799	anoxic specific inducibility
		1197	1217	gibberellin-responsive element
		1000	1020	MYB binding site involved in drought-inducibility
		552	572	light responsiveness
		1694	1714	light responsiveness
		1918	1938	light responsiveness
		340	360	light responsiveness
		1302	1322	light responsiveness
HvMYB40	HORVU.MOREX.r3.3HG0298680.1	1507	1527	gibberellin-responsiveness
		1103	1123	light responsiveness
		1643	1663	light responsiveness
		10	30	abscisic acid responsiveness
		225	245	abscisic acid responsiveness
		976	996	abscisic acid responsiveness
		1114	1134	abscisic acid responsiveness
		1645	1665	abscisic acid responsiveness
		1781	1801	anaerobic induction
		1811	1831	anaerobic induction
		231	251	circadian control
		861	881	light responsiveness
		1089	1109	light responsiveness
		1539	1559	light responsiveness
		10	30	light responsiveness
		225	245	light responsiveness
		1645	1665	light responsiveness
		716	736	MeJA-responsiveness
		1872	1892	MeJA-responsiveness
		1999	2019	MeJA-responsiveness
		716	736	MeJA-responsiveness
		1872	1892	MeJA-responsiveness
		1999	2019	MeJA-responsiveness
		1247	1267	zein metabolism regulation
		182	202	meristem expression
		1242	1262	anoxic specific inducibility
		1063	1083	light responsiveness
		1284	1304	light responsiveness
		1289	1309	light responsiveness
		1355	1375	light responsiveness
		849	869	MYBHv1 binding site
		1585	1605	MYBHv1 binding site
		1574	1594	part of a light response element
		270	290	light responsiveness
		1246	1266	light responsiveness
		1527	1547	light responsiveness
		785	805	light responsiveness
		601	621	light responsiveness
HvMYB41	HORVU.MOREX.r3.3HG0300210.1	448	468	auxin-responsive element
		188	208	binding site of AT-rich DNA binding protein (ATBP-1)
		1502	1522	low-temperature responsiveness
		1730	1750	abscisic acid responsiveness
		210	230	anaerobic induction
		1729	1749	light responsiveness
		1665	1685	light responsiveness
		1955	1975	light responsiveness
		1670	1690	MeJA-responsiveness
		1670	1690	MeJA-responsiveness
		1810	1830	anoxic specific inducibility
		1914	1934	anoxic specific inducibility
		1362	1382	gibberellin-responsive element
		762	782	gibberellin-responsive element
		1709	1729	light responsiveness
		1713	1733	light responsiveness
		1399	1419	MYB binding site involved in drought-inducibility
		1462	1482	MYB binding site involved in drought-inducibility
		389	409	light responsiveness
		1191	1211	light responsiveness
HvMYB42	HORVU.MOREX.r3.3HG0301170.1	438	458	auxin-responsive element
		481	501	auxin-responsive element
		390	410	defense and stress responsiveness
		1004	1024	defense and stress responsiveness
		401	421	gibberellin-responsiveness
		239	259	low-temperature responsiveness
		412	432	abscisic acid responsiveness
		1444	1464	abscisic acid responsiveness
		374	394	anaerobic induction
		444	464	anaerobic induction
		487	507	anaerobic induction
		576	596	anaerobic induction
		621	641	anaerobic induction
		1273	1293	anaerobic induction
		411	431	light responsiveness
		1443	1463	light responsiveness
		410	430	MeJA-responsiveness
		526	546	MeJA-responsiveness
		659	679	MeJA-responsiveness
		1106	1126	MeJA-responsiveness
		1584	1604	MeJA-responsiveness
		1770	1790	MeJA-responsiveness
		410	430	MeJA-responsiveness
		526	546	MeJA-responsiveness
		659	679	MeJA-responsiveness
		1106	1126	MeJA-responsiveness
		1584	1604	MeJA-responsiveness
		1770	1790	MeJA-responsiveness
		408	428	zein metabolism regulation
		1496	1516	meristem expression
		814	834	MYB binding site involved in drought-inducibility
		1665	1685	MYB binding site involved in drought-inducibility
		707	727	MYB binding site involved in light responsiveness
		460	480	MYBHv1 binding site
		637	657	MYBHv1 binding site
		1415	1435	part of a conserved DNA module involved in light responsiveness
		1837	1857	light responsiveness
		1243	1263	part of a light responsive module
		1154	1174	light responsiveness
HvMYB43	HORVU.MOREX.r3.3HG0301430.1	1827	1847	cell cycle regulation
		1578	1598	gibberellin-responsiveness
		1653	1673	light responsiveness
		615	635	low-temperature responsiveness
		379	399	abscisic acid responsiveness
		665	685	abscisic acid responsiveness
		667	687	abscisic acid responsiveness
		1437	1457	abscisic acid responsiveness
		1966	1986	cis-acting regulatory element
		378	398	light responsiveness
		667	687	light responsiveness
		485	505	MeJA-responsiveness
		1621	1641	MeJA-responsiveness
		485	505	MeJA-responsiveness
		1621	1641	MeJA-responsiveness
		1855	1875	meristem expression
		1937	1957	meristem expression
		1082	1102	endosperm expression
		1888	1908	anoxic specific inducibility
		1869	1889	light responsiveness
		1566	1586	MYB binding site involved in light responsiveness
		1829	1849	MYBHv1 binding site
		666	686	light responsiveness
		505	525	light responsiveness
		1726	1746	light responsiveness
HvMYB44	HORVU.MOREX.r3.3HG0302660.1	1337	1357	auxin-responsive element
		209	229	defense and stress responsiveness
		544	564	low-temperature responsiveness
		551	571	low-temperature responsiveness
		1245	1265	low-temperature responsiveness
		1345	1365	low-temperature responsiveness
		254	274	salicylic acid responsiveness
		296	316	abscisic acid responsiveness
		301	321	abscisic acid responsiveness
		375	395	abscisic acid responsiveness
		717	737	abscisic acid responsiveness
		718	738	abscisic acid responsiveness
		1006	1026	abscisic acid responsiveness
		922	942	cis-acting regulatory element
		980	1000	cis-acting regulatory element
		296	316	light responsiveness
		301	321	light responsiveness
		375	395	light responsiveness
		715	735	light responsiveness
		717	737	light responsiveness
		1005	1025	light responsiveness
		717	737	light responsiveness
		298	318	MeJA-responsiveness
		802	822	MeJA-responsiveness
		822	842	MeJA-responsiveness
		298	318	MeJA-responsiveness
		802	822	MeJA-responsiveness
		822	842	MeJA-responsiveness
		1303	1323	zein metabolism regulation
		458	478	anoxic specific inducibility
		1660	1680	anoxic specific inducibility
		1700	1720	anoxic specific inducibility
		1838	1858	anoxic specific inducibility
		1691	1711	light responsiveness
		1732	1752	light responsiveness
		1768	1788	light responsiveness
		1791	1811	light responsiveness
		1795	1815	light responsiveness
		2000	2020	light responsiveness
		1654	1674	MYB binding site involved in drought-inducibility
		418	438	MYBHv1 binding site
		1607	1627	MYBHv1 binding site
		1671	1691	MYBHv1 binding site
		1567	1587	part of a conserved DNA module involved in light responsiveness
		1882	1902	light responsiveness
HvMYB45	HORVU.MOREX.r3.3HG0311940.1	1131	1151	auxin-responsive element
		1427	1447	auxin-responsive element
		740	760	gibberellin-responsiveness
		478	498	light responsiveness
		342	362	low-temperature responsiveness
		532	552	salicylic acid responsiveness
		1037	1057	abscisic acid responsiveness
		1386	1406	abscisic acid responsiveness
		1549	1569	abscisic acid responsiveness
		1037	1057	light responsiveness
		1386	1406	light responsiveness
		1548	1568	light responsiveness
		903	923	MeJA-responsiveness
		979	999	MeJA-responsiveness
		1388	1408	MeJA-responsiveness
		903	923	MeJA-responsiveness
		979	999	MeJA-responsiveness
		1388	1408	MeJA-responsiveness
		1914	1934	meristem expression
		1627	1647	anoxic specific inducibility
		1120	1140	light responsiveness
		1213	1233	light responsiveness
		1364	1384	light responsiveness
		1601	1621	light responsiveness
		150	170	MYB binding site involved in drought-inducibility
		1717	1737	light responsiveness
		1391	1411	light responsiveness
HvMYB46	HORVU.MOREX.r3.4HG0338090.1	155	175	defense and stress responsiveness
		128	148	low-temperature responsiveness
		180	200	low-temperature responsiveness
		1735	1755	salicylic acid responsiveness
		400	420	abscisic acid responsiveness
		424	444	abscisic acid responsiveness
		1541	1561	abscisic acid responsiveness
		93	113	anaerobic induction
		1523	1543	anaerobic induction
		1541	1561	light responsiveness
		399	419	light responsiveness
		503	523	seed-specific regulation
		507	527	seed-specific regulation
		511	531	seed-specific regulation
		787	807	MeJA-responsiveness
		1307	1327	MeJA-responsiveness
		787	807	MeJA-responsiveness
		1307	1327	MeJA-responsiveness
		850	870	gibberellin-responsive element
		999	1019	gibberellin-responsive element
		1189	1209	gibberellin-responsive element
		712	732	light responsiveness
		209	229	MYB binding site involved in drought-inducibility
		1212	1232	MYB binding site involved in drought-inducibility
		1230	1250	MYB binding site involved in drought-inducibility
		80	100	MYB binding site involved in light responsiveness
		263	283	MYBHv1 binding site
		1973	1993	MYBHv1 binding site
		154	174	part of a conserved DNA module array (CMA3)
		147	167	part of a conserved DNA module involved in light responsiveness
		227	247	part of a conserved DNA module involved in light responsiveness
		349	369	part of a conserved DNA module involved in light responsiveness
		494	514	part of a conserved DNA module involved in light responsiveness
		647	667	part of a conserved DNA module involved in light responsiveness
		1105	1125	part of a conserved DNA module involved in light responsiveness
		1044	1064	part of a light response element
		397	417	light responsiveness
		1719	1739	light responsiveness
		1719	1739	light responsiveness
		1591	1611	light responsiveness
		327	347	light responsiveness
		1348	1368	light responsiveness
HvMYB47	HORVU.MOREX.r3.4HG0346020.1	1303	1323	auxin-responsive element
		1463	1483	defense and stress responsiveness
		910	930	gibberellin-responsiveness
		1769	1789	light responsiveness
		157	177	abscisic acid responsiveness
		1336	1356	abscisic acid responsiveness
		1397	1417	circadian control
		156	176	light responsiveness
		1037	1057	light responsiveness
		1336	1356	light responsiveness
		1720	1740	light responsiveness
		1327	1347	MeJA-responsiveness
		1327	1347	MeJA-responsiveness
		1587	1607	zein metabolism regulation
		253	273	gibberellin-responsive element
		558	578	gibberellin-responsive element
		1927	1947	light responsiveness
		366	386	MYB binding site involved in drought-inducibility
		1919	1939	part of a conserved DNA module involved in light responsiveness
		1635	1655	light responsiveness
		1086	1106	light responsiveness
HvMYB48	HORVU.MOREX.r3.4HG0353430.1	812	832	salicylic acid responsiveness
		1125	1145	abscisic acid responsiveness
		1254	1274	abscisic acid responsiveness
		1255	1275	abscisic acid responsiveness
		1830	1850	abscisic acid responsiveness
		903	923	cis-acting regulatory element
		1677	1697	cis-acting regulatory element
		963	983	auxin responsiveness
		1252	1272	light responsiveness
		1254	1274	light responsiveness
		1700	1720	light responsiveness
		1125	1145	light responsiveness
		1254	1274	light responsiveness
		772	792	MeJA-responsiveness
		1821	1841	MeJA-responsiveness
		772	792	MeJA-responsiveness
		1821	1841	MeJA-responsiveness
		966	986	zein metabolism regulation
		1515	1535	zein metabolism regulation
		657	677	anoxic specific inducibility
		225	245	gibberellin-responsive element
		1299	1319	light responsiveness
		443	463	part of a conserved DNA module involved in light responsiveness
		839	859	light responsiveness
		1039	1059	light responsiveness
HvMYB49	HORVU.MOREX.r3.4HG0359060.1	663	683	salicylic acid responsiveness
		1358	1378	salicylic acid responsiveness
		270	290	abscisic acid responsiveness
		405	425	abscisic acid responsiveness
		419	439	abscisic acid responsiveness
		939	959	abscisic acid responsiveness
		1030	1050	abscisic acid responsiveness
		1443	1463	abscisic acid responsiveness
		1602	1622	abscisic acid responsiveness
		1999	2019	abscisic acid responsiveness
		1677	1697	cis-acting regulatory element
		1742	1762	cis-acting regulatory element
		404	424	light responsiveness
		419	439	light responsiveness
		938	958	light responsiveness
		1443	1463	light responsiveness
		1599	1619	light responsiveness
		1602	1622	light responsiveness
		1999	2019	light responsiveness
		471	491	MeJA-responsiveness
		685	705	MeJA-responsiveness
		694	714	MeJA-responsiveness
		1413	1433	MeJA-responsiveness
		2001	2021	MeJA-responsiveness
		471	491	MeJA-responsiveness
		685	705	MeJA-responsiveness
		694	714	MeJA-responsiveness
		1413	1433	MeJA-responsiveness
		2001	2021	MeJA-responsiveness
		1998	2018	zein metabolism regulation
		806	826	meristem expression
		1866	1886	meristem expression
		1610	1630	anoxic specific inducibility
		1874	1894	gibberellin-responsive element
		254	274	light responsiveness
		1432	1452	MYB binding site involved in drought-inducibility
		1693	1713	MYB binding site involved in drought-inducibility
		622	642	MYB binding site involved in light responsiveness
		994	1014	part of a conserved DNA module involved in light responsiveness
		1180	1200	part of a conserved DNA module involved in light responsiveness
		739	759	light responsiveness
		1935	1955	light responsiveness
HvMYB50	HORVU.MOREX.r3.4HG0380990.1	273	293	auxin-responsive element
		1645	1665	gibberellin-responsiveness
		228	248	low-temperature responsiveness
		370	390	salicylic acid responsiveness
		315	335	abscisic acid responsiveness
		797	817	abscisic acid responsiveness
		139	159	anaerobic induction
		856	876	anaerobic induction
		861	881	anaerobic induction
		1932	1952	anaerobic induction
		1937	1957	anaerobic induction
		1942	1962	anaerobic induction
		1154	1174	auxin responsiveness
		384	404	circadian control
		314	334	light responsiveness
		339	359	light responsiveness
		1675	1695	light responsiveness
		797	817	meristem expression
		983	1003	endosperm expression
		407	427	gibberellin-responsive element
		482	502	gibberellin-responsive element
		415	435	light responsiveness
		416	436	light responsiveness
		1838	1858	light responsiveness
		93	113	MYB binding site involved in drought-inducibility
		462	482	part of a conserved DNA module involved in light responsiveness
		919	939	part of a conserved DNA module involved in light responsiveness
		962	982	part of a conserved DNA module involved in light responsiveness
		1621	1641	light responsiveness
HvMYB51	HORVU.MOREX.r3.4HG0383040.1	148	168	low-temperature responsiveness
		627	647	low-temperature responsiveness
		774	794	abscisic acid responsiveness
		1047	1067	abscisic acid responsiveness
		1542	1562	abscisic acid responsiveness
		1618	1638	abscisic acid responsiveness
		1636	1656	abscisic acid responsiveness
		1887	1907	abscisic acid responsiveness
		23	43	cis-acting regulatory element
		238	258	cis-acting regulatory element
		1222	1242	anaerobic induction
		1591	1611	light responsiveness
		1618	1638	light responsiveness
		1887	1907	light responsiveness
		774	794	light responsiveness
		1046	1066	light responsiveness
		1541	1561	light responsiveness
		1139	1159	seed-specific regulation
		1143	1163	seed-specific regulation
		500	520	MeJA-responsiveness
		800	820	MeJA-responsiveness
		911	931	MeJA-responsiveness
		500	520	MeJA-responsiveness
		800	820	MeJA-responsiveness
		911	931	MeJA-responsiveness
		1504	1524	anoxic specific inducibility
		1859	1879	gibberellin-responsive element
		294	314	light responsiveness
		1165	1185	light responsiveness
		1166	1186	light responsiveness
		1292	1312	light responsiveness
		1953	1973	light responsiveness
		350	370	MYBHv1 binding site
		1949	1969	MYBHv1 binding site
		115	135	part of a conserved DNA module involved in light responsiveness
		889	909	light responsiveness
		477	497	light responsiveness
HvMYB52	HORVU.MOREX.r3.4HG0384200.1	403	423	auxin-responsive element
		208	228	low-temperature responsiveness
		1089	1109	salicylic acid responsiveness
		1603	1623	salicylic acid responsiveness
		806	826	abscisic acid responsiveness
		1724	1744	abscisic acid responsiveness
		1810	1830	abscisic acid responsiveness
		152	172	anaerobic induction
		805	825	light responsiveness
		969	989	light responsiveness
		1489	1509	light responsiveness
		1721	1741	light responsiveness
		1724	1744	light responsiveness
		677	697	seed-specific regulation
		1762	1782	seed-specific regulation
		235	255	MeJA-responsiveness
		819	839	MeJA-responsiveness
		1230	1250	MeJA-responsiveness
		1751	1771	MeJA-responsiveness
		235	255	MeJA-responsiveness
		819	839	MeJA-responsiveness
		1230	1250	MeJA-responsiveness
		1751	1771	MeJA-responsiveness
		981	1001	meristem expression
		50	70	endosperm expression
		1919	1939	anoxic specific inducibility
		2002	2022	anoxic specific inducibility
		19	39	light responsiveness
		370	390	light responsiveness
		1589	1609	light responsiveness
		1590	1610	light responsiveness
		1626	1646	light responsiveness
		1680	1700	light responsiveness
		554	574	MYB binding site involved in drought-inducibility
		1391	1411	MYB binding site involved in drought-inducibility
		1655	1675	MYB binding site involved in drought-inducibility
		347	367	part of a conserved DNA module array (CMA3)
		1107	1127	part of a conserved DNA module involved in light responsiveness
		1572	1592	part of a conserved DNA module involved in light responsiveness
		1577	1597	part of a conserved DNA module involved in light responsiveness
		1062	1082	part of a conserved DNA module involved in light responsiveness
		146	166	light responsiveness
HvMYB53	HORVU.MOREX.r3.4HG0392620.1	740	760	low-temperature responsiveness
		669	689	abscisic acid responsiveness
		750	770	abscisic acid responsiveness
		954	974	cis-acting regulatory element
		964	984	cis-acting regulatory element
		1794	1814	cis-acting regulatory element
		40	60	anaerobic induction
		170	190	anaerobic induction
		669	689	light responsiveness
		1503	1523	MeJA-responsiveness
		1503	1523	MeJA-responsiveness
		1219	1239	MYBHv1 binding site
		208	228	part of a conserved DNA module involved in light responsiveness
		1509	1529	part of a conserved DNA module involved in light responsiveness
		1565	1585	light responsiveness
		856	876	light responsiveness
HvMYB54	HORVU.MOREX.r3.4HG0412080.1	1662	1682	salicylic acid responsiveness
		598	618	abscisic acid responsiveness
		1268	1288	abscisic acid responsiveness
		1270	1290	abscisic acid responsiveness
		1292	1312	abscisic acid responsiveness
		1293	1313	abscisic acid responsiveness
		195	215	anaerobic induction
		597	617	light responsiveness
		1270	1290	light responsiveness
		1291	1311	light responsiveness
		1292	1312	light responsiveness
		1292	1312	light responsiveness
		1228	1248	MeJA-responsiveness
		1228	1248	MeJA-responsiveness
		82	102	endosperm expression
		605	625	MYB binding site involved in drought-inducibility
		1968	1988	MYB binding site involved in drought-inducibility
		390	410	part of a conserved DNA module involved in light responsiveness
		653	673	part of a conserved DNA module involved in light responsiveness
		1060	1080	part of a conserved DNA module involved in light responsiveness
		1896	1916	part of a conserved DNA module involved in light responsiveness
		1945	1965	part of a conserved DNA module involved in light responsiveness
		1509	1529	light responsiveness
		343	363	light responsiveness
HvMYB55	HORVU.MOREX.r3.5HG0441760.1	342	362	low-temperature responsiveness
		164	184	salicylic acid responsiveness
		610	630	abscisic acid responsiveness
		961	981	abscisic acid responsiveness
		1098	1118	abscisic acid responsiveness
		1138	1158	abscisic acid responsiveness
		1156	1176	abscisic acid responsiveness
		1157	1177	abscisic acid responsiveness
		115	135	cis-acting regulatory element
		1008	1028	anaerobic induction
		1787	1807	anaerobic induction
		64	84	circadian control
		961	981	light responsiveness
		1156	1176	light responsiveness
		610	630	light responsiveness
		1098	1118	light responsiveness
		1138	1158	light responsiveness
		1156	1176	light responsiveness
		129	149	MeJA-responsiveness
		538	558	MeJA-responsiveness
		129	149	MeJA-responsiveness
		538	558	MeJA-responsiveness
		1370	1390	MYB binding site involved in drought-inducibility
		1600	1620	MYBHv1 binding site
		1757	1777	part of a conserved DNA module involved in light responsiveness
		1421	1441	light responsiveness
		580	600	light responsiveness
		510	530	light responsiveness
		932	952	light responsiveness
		575	595	light responsiveness
		1553	1573	light responsiveness
		525	545	wound-responsive element
HvMYB56	HORVU.MOREX.r3.5HG0442330.2	1986	2006	auxin-responsive element
		1196	1216	gibberellin-responsiveness
		1123	1143	salicylic acid responsiveness
		1248	1268	abscisic acid responsiveness
		1077	1097	cis-acting regulatory element
		1384	1404	cis-acting regulatory element
		1888	1908	cis-acting regulatory element
		11	31	anaerobic induction
		20	40	anaerobic induction
		1462	1482	anaerobic induction
		245	265	gibberellin-responsive element
		704	724	gibberellin-responsive element
		1534	1554	gibberellin-responsive element
		329	349	MYB binding site involved in drought-inducibility
		1294	1314	MYB binding site involved in drought-inducibility
		259	279	part of a conserved DNA module involved in light responsiveness
		342	362	part of a conserved DNA module involved in light responsiveness
		48	68	light responsiveness
		1829	1849	light responsiveness
HvMYB57	HORVU.MOREX.r3.5HG0443240.1	1691	1711	auxin-responsive element
		1889	1909	auxin-responsive element
		879	899	low-temperature responsiveness
		921	941	low-temperature responsiveness
		1295	1315	abscisic acid responsiveness
		1296	1316	abscisic acid responsiveness
		1423	1443	abscisic acid responsiveness
		1819	1839	abscisic acid responsiveness
		1820	1840	abscisic acid responsiveness
		1786	1806	cis-acting regulatory element
		1966	1986	cis-acting regulatory element
		1295	1315	light responsiveness
		1423	1443	light responsiveness
		1819	1839	light responsiveness
		1295	1315	light responsiveness
		1819	1839	light responsiveness
		412	432	zein metabolism regulation
		1727	1747	anoxic specific inducibility
		1992	2012	gibberellin-responsive element
		391	411	light responsiveness
		1568	1588	light responsiveness
		1570	1590	light responsiveness
		19	39	light responsiveness
		23	43	light responsiveness
		27	47	light responsiveness
		523	543	light responsiveness
		111	131	MYB binding site involved in drought-inducibility
		1503	1523	MYB binding site involved in drought-inducibility
		1921	1941	part of a conserved DNA module involved in light responsiveness
		1794	1814	light responsiveness
		1842	1862	light responsiveness
		647	667	light responsiveness
HvMYB58	HORVU.MOREX.r3.5HG0455320.1	1058	1078	auxin-responsive element
		459	479	defense and stress responsiveness
		802	822	salicylic acid responsiveness
		186	206	abscisic acid responsiveness
		605	625	abscisic acid responsiveness
		1713	1733	cis-acting regulatory element
		954	974	anaerobic induction
		1207	1227	anaerobic induction
		602	622	light responsiveness
		1912	1932	MeJA-responsiveness
		1912	1932	MeJA-responsiveness
		1741	1761	zein metabolism regulation
		1942	1962	meristem expression
		1737	1757	endosperm expression
		1583	1603	gibberellin-responsive element
		1292	1312	light responsiveness
		1483	1503	light responsiveness
		1850	1870	light responsiveness
		103	123	MYB binding site involved in drought-inducibility
		1572	1592	MYB binding site involved in drought-inducibility
		1076	1096	part of a conserved DNA module involved in light responsiveness
		1087	1107	part of a conserved DNA module involved in light responsiveness
		1626	1646	light responsiveness
		449	469	light responsiveness
		885	905	light responsiveness
		1638	1658	light responsiveness
HvMYB59	HORVU.MOREX.r3.5HG0467660.1	1119	1139	auxin-responsive element
		1839	1859	auxin-responsive element
		1272	1292	cell cycle regulation
		108	128	defense and stress responsiveness
		1544	1564	light responsiveness
		1179	1199	low-temperature responsiveness
		1730	1750	low-temperature responsiveness
		1843	1863	low-temperature responsiveness
		1976	1996	low-temperature responsiveness
		146	166	salicylic acid responsiveness
		706	726	abscisic acid responsiveness
		956	976	abscisic acid responsiveness
		1136	1156	abscisic acid responsiveness
		1165	1185	abscisic acid responsiveness
		1357	1377	abscisic acid responsiveness
		1702	1722	abscisic acid responsiveness
		1948	1968	abscisic acid responsiveness
		807	827	cis-acting regulatory element
		949	969	cis-acting regulatory element
		1619	1639	cis-acting regulatory element
		1930	1950	cis-acting regulatory element
		273	293	auxin responsiveness
		129	149	light responsiveness
		705	725	light responsiveness
		907	927	light responsiveness
		1136	1156	light responsiveness
		1281	1301	light responsiveness
		1357	1377	light responsiveness
		1702	1722	light responsiveness
		1948	1968	light responsiveness
		1650	1670	seed-specific regulation
		366	386	MeJA-responsiveness
		577	597	MeJA-responsiveness
		646	666	MeJA-responsiveness
		716	736	MeJA-responsiveness
		1112	1132	MeJA-responsiveness
		1613	1633	MeJA-responsiveness
		366	386	MeJA-responsiveness
		577	597	MeJA-responsiveness
		646	666	MeJA-responsiveness
		716	736	MeJA-responsiveness
		1112	1132	MeJA-responsiveness
		1613	1633	MeJA-responsiveness
		174	194	light responsiveness
		512	532	light responsiveness
		1005	1025	light responsiveness
		1009	1029	light responsiveness
		1986	2006	MYB binding site involved in drought-inducibility
		1027	1047	MYBHv1 binding site
		1274	1294	MYBHv1 binding site
		610	630	part of a conserved DNA module involved in light responsiveness
		1783	1803	light responsiveness
		347	367	light responsiveness
		1325	1345	light responsiveness
		1914	1934	light responsiveness
		1920	1940	light responsiveness
		839	859	light responsiveness
		108	128	light responsiveness
HvMYB60	HORVU.MOREX.r3.5HG0479070.1	724	744	auxin-responsive element
		1934	1954	light responsiveness
		894	914	low-temperature responsiveness
		1862	1882	low-temperature responsiveness
		1565	1585	abscisic acid responsiveness
		418	438	cis-acting regulatory element
		1913	1933	anaerobic induction
		1948	1968	anaerobic induction
		401	421	auxin responsiveness
		1596	1616	auxin responsiveness
		1603	1623	auxin responsiveness
		297	317	light responsiveness
		1565	1585	light responsiveness
		423	443	MeJA-responsiveness
		1567	1587	MeJA-responsiveness
		423	443	MeJA-responsiveness
		1567	1587	MeJA-responsiveness
		329	349	zein metabolism regulation
		540	560	zein metabolism regulation
		1564	1584	zein metabolism regulation
		681	701	meristem expression
		1705	1725	anoxic specific inducibility
		1475	1495	gibberellin-responsive element
		1756	1776	light responsiveness
		1693	1713	MYB binding site involved in drought-inducibility
HvMYB61	HORVU.MOREX.r3.5HG0481700.1	12	32	auxin-responsive element
		1514	1534	auxin-responsive element
		1645	1665	defense and stress responsiveness
		100	120	low-temperature responsiveness
		452	472	abscisic acid responsiveness
		1274	1294	abscisic acid responsiveness
		1612	1632	abscisic acid responsiveness
		1745	1765	abscisic acid responsiveness
		814	834	anaerobic induction
		452	472	light responsiveness
		1745	1765	light responsiveness
		1748	1768	light responsiveness
		1878	1898	light responsiveness
		439	459	MeJA-responsiveness
		454	474	MeJA-responsiveness
		439	459	MeJA-responsiveness
		454	474	MeJA-responsiveness
		451	471	zein metabolism regulation
[truncated: 1,034 more rows]
