# Supplementary material for: Comparative genomics analysis of the MYB gene family in barley: preliminary insights into evolution and biological function in Blue Qingke
Source: PeerJ. 2024 Dec 2;12:e18443. doi: 10.7717/peerj.18443 (PMC11619697; doi:10.7717/peerj.18443)
Supplement: Supplemental Information 10 [file peerj-12-18443-s010.xlsx]

## Sheet: Sheet1
Table S9 Raw RNA-seq data of 41 differential genes from blue and white Qingke
ID	White_1_1_fpkm	White_1_2_fpkm	White_1_3_fpkm	White_2_1_fpkm	White_2_2_fpkm	White_2_3_fpkm	White_3_1_fpkm	White_3_2_fpkm	White_3_3_fpkm	Blue_1_1_fpkm	Blue_1_2_fpkm	Blue_1_3_fpkm	Blue_2_1_fpkm	Blue_2_2_fpkm	Blue_2_3_fpkm	Blue_3_1_fpkm	Blue_3_2_fpkm	Blue_3_3_fpkm
HORVU.MOREX.r3.1HG0017050	0	0	0	0.736152	1.03453	0	0	0	0	0.213662	0	0.431546	0	0.0864677	0.27814	0.381017	0	0
HORVU.MOREX.r3.1HG0031520	5.39152	5.63049	4.40122	0.455237	0.434117	0.0485764	0	0	0.243351	2.4664	2.66253	1.49001	0.0283687	0.0267358	0.28667	0.250347	0.195449	0
HORVU.MOREX.r3.1HG0069820	3.36259	3.47195	3.59025	4.81131	5.55692	5.44322	6.73432	5.6366	5.82556	6.87003	7.60255	7.22109	9.89778	8.71527	10.4399	9.50713	9.32326	6.37357
HORVU.MOREX.r3.1HG0089650	41.5483	42.3141	39.9187	0	0.27067	0	0	0	0	3.91313	5.49586	2.89798	0	0	0	0	0	0
HORVU.MOREX.r3.2HG0210870	1.1273	0.863448	1.2554	2.92562	0.468174	1.85499	3.85908	2.8543	2.47809	0.574295	0.300588	0.621395	1.42681	0.697241	0.801005	2.35914	1.93242	3.80914
HORVU.MOREX.r3.3HG0236520	0.151898	0.271016	0.243035	3.821	1.66542	2.30685	3.57145	4.41011	3.94176	1.11874	1.11382	1.81749	5.20084	3.89757	5.19221	3.51297	3.71933	2.56172
HORVU.MOREX.r3.3HG0236690	2.01172	2.49258	1.9698	1.24848	1.53171	0.740112	0.205295	0	0	0.671038	0.676106	1.15204	1.72891	1.22204	2.79534	0.134622	0	0
HORVU.MOREX.r3.3HG0300210	3.10171	5.28181	3.18123	27.7716	26.622	23.1735	30.4354	32.9802	23.828	11.0147	9.33086	11.0592	15.9119	13.2182	13.9243	23.5025	26.8634	24.1782
HORVU.MOREX.r3.5HG0441760	5.43794	4.90508	5.35634	1.57491	4.15547	3.16897	12.4195	12.6061	6.86332	1.95901	2.59187	1.49477	3.86962	5.49675	3.79696	13.77	15.1579	21.3586
HORVU.MOREX.r3.5HG0442330	14.6139	15.8604	13.6328	83.0806	93.3428	91.1608	2.81698	1.40852	1.79561	28.7606	36.4145	29.3183	120.222	114.42	118.666	1.30393	1.81195	1.05094
HORVU.MOREX.r3.5HG0467660	1.92393	1.36858	2.42188	19.7408	19.8909	21.9839	47.1484	42.435	42.8511	6.3058	4.64723	5.45315	18.8144	18.3034	16.5119	78.8359	72.049	63.7631
HORVU.MOREX.r3.6HG0596410	0	0	0	0	0	0	0	0	0	0.568602	0.434012	0.0957033	0.122082	0	0	0	0	0.985063
HORVU.MOREX.r3.6HG0622080	1.67321	1.50057	1.59353	0.461511	0.132361	0.351756	0.195143	0.134494	0	0.191356	0.175274	0.772988	0.246512	0.309763	0.0830346	0	0	0
HORVU.MOREX.r3.7HG0666620	22.9485	23.3052	24.145	0.582489	0	2.23758	0	0	0	54.8889	55.0247	60.8947	0.290389	0.136837	0	0	0	0
HORVU.MOREX.r3.7HG0687560	0.424721	1.80425	1.27415	6.12516	11.5913	9.42884	16.7178	15.7723	13.9558	5.82876	4.98297	4.21855	15.2679	16.5121	14.7961	11.9534	9.94861	12.7234
HORVU.MOREX.r3.7HG0711530	1.00194	1.24944	0.77569	0	0	0	0	0	0.152495	0.206995	0.426596	0.20904	0	0	0	0.173029	0	0
HORVU.MOREX.r3.7HG0751030	0.292812	0.186584	0.355556	2.66522	2.9533	2.91782	0.230513	1.05914	0.740113	1.0716	0.950862	0.541092	6.51407	4.63483	5.18759	1.00773	1.44035	0.788998
HORVU.MOREX.r3.1HG0075320	2.04224	1.56598	1.92663	6.50448	7.55336	5.10343	8.39928	4.24947	5.54506	4.01018	2.93852	3.30215	1.11269	1.87257	1.52595	5.73474	6.78144	4.57457
HORVU.MOREX.r3.1HG0079700	0	0	0	0	0	0	0	0	0	0	0	0	0.411606	0	1.10916	0	0	0
HORVU.MOREX.r3.1HG0084760	1.30479	1.04098	1.5912	0	0.158601	0	0.233829	0.322312	0	0.254769	0.140014	0.771857	0.459482	0.371172	0.596974	0.306667	0.278299	0
HORVU.MOREX.r3.2HG0121480	3.48552	2.7016	2.48965	0	0.130607	0	0	0.20644	0	0.839202	0.691805	0.466121	0.702706	0.152829	0.382359	0.112239	0	0.174463
HORVU.MOREX.r3.2HG0135680	0	0	0	0	0.443974	0.104879	0.472739	0.63492	0	0	0	0	0.673742	1.03903	1.60923	0.572306	0	0
HORVU.MOREX.r3.3HG0222600	1.25416	3.26326	1.72445	0.259444	0	0	0	0	0	0.878516	0.689727	1.77439	1.45508	1.21896	1.96051	0	0	0
HORVU.MOREX.r3.3HG0264850	6.43967	5.86303	6.63044	0.631541	1.58485	0.589655	0.817804	0.697833	0	5.49898	7.48528	5.32192	2.95165	2.41086	2.18731	0	0	0.95266
HORVU.MOREX.r3.3HG0298680	8.97814	7.40974	7.70652	14.2206	17.0271	17.4197	52.6135	53.2051	43.8151	4.38035	2.65597	6.6666	5.16604	7.11578	8.59353	47.0744	42.5841	26.8489
HORVU.MOREX.r3.3HG0301430	9.36235	10.723	9.85854	11.3879	14.8935	14.021	31.3162	32.5378	32.4277	3.86671	5.48241	5.40269	4.70828	4.30866	4.55093	27.4517	29.6537	28.6305
HORVU.MOREX.r3.4HG0338090	0	0	0	0.688483	0.789825	0.10495	0	0.802552	0	0	0.522949	0	1.83873	1.96395	1.85807	0	0.974474	0.46158
HORVU.MOREX.r3.4HG0346020	0.571731	0.618231	0.363827	0	0	0	0.381893	0	0	0	0	0	0.857636	0.808271	1.40831	0.166951	0.397707	0.980356
HORVU.MOREX.r3.4HG0353430	0.653899	0.800667	1.84629	2.29164	1.46966	1.01888	0.376828	0.432853	0.453709	0.61586	0.902561	0.435361	0.158674	0.523393	0.721542	1.11197	0.33637	0.682838
HORVU.MOREX.r3.4HG0383040	0.382643	0.408459	0.412074	0.63325	1.56469	1.71528	0.0720894	0.463721	1.04157	0.377016	0.906492	1.47537	2.73198	2.00256	3.86499	0.189091	0.160874	1.40428
HORVU.MOREX.r3.4HG0392620	0	0.0589093	0	1.57368	4.24531	3.88316	7.27788	6.01914	7.15038	0.0951554	0.174316	0	61.904	57.3011	54.5034	9.48131	6.4965	7.2534
HORVU.MOREX.r3.6HG0575580	33.4455	39.4435	43.8451	84.6818	88.8155	82.8591	225.593	239.229	202.609	28.8465	27.6394	29.1315	33.3341	35.5915	29.2069	241.679	236.811	278.828
HORVU.MOREX.r3.6HG0595270	0	0	0	0	0	0	4.06272	2.58929	3.91328	0.17135	0	0	1.32443	1.35221	0.669179	8.53668	7.54552	1.18741
HORVU.MOREX.r3.7HG0746520	0.750061	0.693911	1.65012	1.90333	1.49522	0.441515	1.71457	0.956605	1.41557	0.560432	0.806664	0.323411	0	0.194403	0.729559	1.98096	2.18641	0.665767
HORVU.MOREX.r3.1HG0018590	3.31494	2.94103	2.35319	1.5239	1.63166	1.04792	2.35549	1.63493	3.35499	1.86748	1.2904	1.65433	0.506473	0.238661	0.725049	1.53366	0.961824	1.11248
HORVU.MOREX.r3.1HG0025510	2.5862	4.07412	3.78691	11.235	11.2009	12.5593	70.9756	74.5248	79.6955	3.99289	2.50594	3.06159	0.95255	0.987494	0.57754	31.5968	27.7653	31.3589
HORVU.MOREX.r3.2HG0104540	0	0.142708	0	0.119132	0.398616	0.67798	0	0.378036	0.481162	0	0.0703803	0.0387986	0.544419	0.373151	1.05028	0.899215	1.28525	1.22467
HORVU.MOREX.r3.2HG0197540	0.0524771	0.260082	0.0524768	0.825041	2.65887	0.973037	1.28526	0.620066	1.02134	0.126032	0.34632	0.339406	0.595315	1.47913	1.47659	0.084281	0.229454	0
HORVU.MOREX.r3.4HG0380990	0	0.41199	0	0.917142	0.61375	0.815537	3.50636	6.912	2.56028	0.147885	0.745008	0.074673	0.476275	0.448861	0.192513	2.17568	1.91833	1.99836
HORVU.MOREX.r3.5HG0500520	3.45844	4.8354	3.82246	3.01237	2.41905	1.99291	2.18446	1.14708	0.472351	4.19671	2.93639	3.35522	4.65546	2.05221	2.88335	3.46909	4.17842	3.35251
HORVU.MOREX.r3.6HG0596330	0.115292	0	0.0768609	1.46281	1.72373	0.88225	2.30603	1.60014	2.03989	0.184595	0	0	1.10974	1.04586	2.00251	3.99134	4.91507	5.84164
