# Supplementary material for: Comparative genomics analysis of the MYB gene family in barley: preliminary insights into evolution and biological function in Blue Qingke
Source: PeerJ. 2024 Dec 2;12:e18443. doi: 10.7717/peerj.18443 (PMC11619697; doi:10.7717/peerj.18443)
Supplement: Supplemental Information 11 [file peerj-12-18443-s011.xlsx]

## Sheet: final
Table S10 Raw data from HvMYB53 and HvMYC RNA-seq and qRT-PCR
	Duplicate value of HvMYB53
		White_1_1_fpkm	White_1_2_fpkm	White_1_3_fpkm	White_2_1_fpkm	White_2_2_fpkm	White_2_3_fpkm	White_3_1_fpkm	White_3_2_fpkm	White_3_3_fpkm	Blue_1_1_fpkm	Blue_1_2_fpkm	Blue_1_3_fpkm	Blue_2_1_fpkm	Blue_2_2_fpkm	Blue_2_3_fpkm	Blue_3_1_fpkm	Blue_3_2_fpkm	Blue_3_3_fpkm
	RNA-seq	0	0.0589093	0	1.57368	4.24531	3.88316	7.27788	6.01914	7.15038	0.0951554	0.174316	0	61.904	57.3011	54.5034	9.48131	6.4965	7.2534
	qRT-PCR	1.20225	1.34988	1.33498	31.0496	8.84109	17.5927	8.61155	7.90913	8.36764	3.23052	2.66439	2.80591	8.02217	6.94576	9.62582	1.02842	1.17062	1
	Duplicate value of HvMYC
		White_1_1_fpkm	White_1_2_fpkm	White_1_3_fpkm	White_2_1_fpkm	White_2_2_fpkm	White_2_3_fpkm	White_3_1_fpkm	White_3_2_fpkm	White_3_3_fpkm	Blue_1_1_fpkm	Blue_1_2_fpkm	Blue_1_3_fpkm	Blue_2_1_fpkm	Blue_2_2_fpkm	Blue_2_3_fpkm	Blue_3_1_fpkm	Blue_3_2_fpkm	Blue_3_3_fpkm
	RNA-seq	0	0	0	0	0	0	0	0	0	0	0	0	11.0108	9.98987	8.96774	9.93863	7.01122	12.9069
	qRT-PCR	4.28288	1	1.57224	93.7915	104.906	98.8734	114.162	104.231	102.014	27.1618	30.0394	26.6108	319.24	289.81	370.861	61.938	47.6551	72.1983
							HvMYB53
	The average value of HvMYB							W1	W2	W3	B1	B2	B3
	W1	W2	W3	B1	B2	B3	error in RNA-seq	0.0277701	1.18333	0.565725	0.0712641	3.05112	1.26691
RNA-seq	0.0196364	3.23405	6.8158	0.0898239	57.9028	7.74374	significant difference	C	BC	B	C	A	B
qRT-PCR	1.2957	19.1611	8.29611	2.90027	8.19792	1.06635	error in qRT-PCR	0.0663599	9.13415	0.291192	0.240562	1.10117	0.074642
							significant difference	B	A	AB	B	AB	B
	The average value of HvMYC						HvMYC
	W1	W2	W3	B1	B2	B3		W1	W2	W3	B1	B2	B3
RNA-seq	0	0	0	0	9.98948	9.95223	error in RNA-seq	3.35607	0.197648	6.22836	0.459067	0.409944	1.79508
qRT-PCR	2.28504	99.1902	106.802	27.9373	326.637	60.5971	significant difference	B	B	B	B	A	A
							error in qRT-PCR	1.43187	4.54292	5.28208	1.50331	33.4998	10.0645
							significant difference	D	B	B	CD	A	BC
