# Supplementary material for: Comparative genomics analysis of the MYB gene family in barley: preliminary insights into evolution and biological function in Blue Qingke
Source: PeerJ. 2024 Dec 2;12:e18443. doi: 10.7717/peerj.18443 (PMC11619697; doi:10.7717/peerj.18443)
Supplement: Supplemental Information 12 [file peerj-12-18443-s012.xlsx]

## Sheet: Sheet1
Table S11 PPI results of interacting proteins HvMYB and HvMYC in blue and white Qingke RNA-seq
node1_protein	node2_protein	node1_gene	node2_gene	score
112509.A0A287J214	112509.A0A287PCL2	HORVU.MOREX.r3.4HG0392660	HORVU.MOREX.r3.4HG0392620	893
