# Supplementary material for: Comparative genomics analysis of the MYB gene family in barley: preliminary insights into evolution and biological function in Blue Qingke
Source: PeerJ. 2024 Dec 2;12:e18443. doi: 10.7717/peerj.18443 (PMC11619697; doi:10.7717/peerj.18443)
Supplement: Supplemental Information 13 [file peerj-12-18443-s013.xls]

## Sheet: Sheet1
ITEM TO CHECK	IMPORTANCE	CHECKLIST	page/line
EXPERIMENTAL DESIGN
Definition of experimental and control groups	E	Yes	3/108
Number within each group	E	3 samples	4/113
Assay carried out by core lab or investigator's lab?	D
Acknowledgement of authors' contributions	D
SAMPLE
Description	E	Qingke grains	3/108
Volume/mass of sample processed	D
Microdissection or macrodissection	E	Not appliable
Processing procedure	E	RNA was reverse-transcribed into cDNA for qRT-PCR	5/159
If frozen - how and how quickly?	E	Yes, RNA frozen at -80 degrees immediately after isolation; see line 113	4/113
If fixed - with what, how quickly?	E	Not appliable
Sample storage conditions and duration (especially for FFPE samples)	E	Store in -80℃ refrigerator until used	4/113
NUCLEIC ACID EXTRACTION
Procedure and/or instrumentation	E	RNA extraction kit (Takara, Beijing, China)	5/156
Name of kit and details of any modifications	E	RNA extraction kit (Takara, Beijing, China)	5/156
Source of additional reagents used	D
Details of DNase or RNAse treatment	E	ddH2O and reverse transcriptase were treated with RNAa, see Table S2, no Dnase treatment.	5/164
Contamination assessment (DNA or RNA)	E	Done by A260/280 determination; also no reverse transcriptase control done for qRT-PCR	5/158
Nucleic acid quantification	E
Instrument and method	E	RNA extraction kit for RNA extract	5/156
Purity (A260/A280)	D
Yield	D
RNA integrity method/instrument	E	Not performed
RIN/RQI or Cq of 3' and 5' transcripts	E	Not performed
Electrophoresis traces	D	Not performed
Inhibition testing (Cq dilutions, spike or other)	E	Not performed
REVERSE TRANSCRIPTION
Complete reaction conditions	E	according to the instructions for the cDNA synthesis kit (Takara, Beijing, China)	5/159
Amount of RNA and reaction volume	E	See Table S2, depending on the reaction	5/161
Priming oligonucleotide (if using GSP) and concentration	E	Not appliable
Reverse transcriptase and concentration	E	See Table S2, depending on the reaction	5/161
Temperature and time	E	See Table S2: 37 ℃ 15 min, 85 ℃ 5 s, 4 ℃ ∞	5/161
Manufacturer of reagents and catalogue numbers	D
Cqs with and without RT	D*	Not performed
Storage conditions of cDNA	D	Stored at -20 degree	5/160
qPCR TARGET INFORMATION
If multiplex, efficiency and LOD of each assay.	E	Not applicable
Sequence accession number	E	Not applicable
Location of amplicon	D
Amplicon length	E	150-250 bp	5/167
In silico specificity screen (BLAST, etc)	E	Yes, BLAST analysis performed	5/169
Pseudogenes, retropseudogenes or other homologs?	D	None
Sequence alignment	D	None
Secondary structure analysis of amplicon	D	Not performed
Location of each primer by exon or intron (if applicable)	E	None
What splice variants are targeted?	E	None
qPCR OLIGONUCLEOTIDES
Primer sequences	E	See Table 1	5/168
RTPrimerDB Identification Number	D	Not applicable
Probe sequences	D**	Not applicable
Location and identity of any modifications	E	None
Manufacturer of oligonucleotides	D	None
Purification method	D	None
qPCR PROTOCOL
Complete reaction conditions	E	see ref. Chen et al., 2023 and Yao et al., 2021	5/172
Reaction volume and amount of cDNA/DNA	E	See Table S3	5/172
Primer, (probe), Mg++ and dNTP concentrations	E	0.8 ul of each primer into 20 ul total as above, see Table S3	5/172
Polymerase identity and concentration	E	See line 158	5/158
Buffer/kit identity and manufacturer	E	See line 170	5/170
Exact chemical constitution of the buffer	D	Not performed
Additives (SYBR Green I, DMSO, etc.)	E	See Table S3	5/172
Manufacturer of plates/tubes and catalog number	D	See line 170	5/170
Complete thermocycling parameters	E	See Table S3	5/172
Reaction setup (manual/robotic)	D
Manufacturer of qPCR instrument	E	See line 171	5/171
qPCR VALIDATION
Evidence of optimisation (from gradients)	D	None
Specificity (gel, sequence, melt, or digest)	E	using 1.0% agarose gel elect rophoresis; see also ref. Chen et al., 2023 and Yao et al., 2021	5/172
For SYBR Green I, Cq of the NTC	E	Not performed
Standard curves with slope and y-intercept	E	Not performed
PCR efficiency calculated from slope	E	Not performed
Confidence interval for PCR efficiency or standard error	D
r2 of standard curve	E	Not performed
Linear dynamic range	E	Yes
Cq variation at lower limit	E	Not performed
Confidence intervals throughout range	D	Not performed
Evidence for limit of detection	E	Not performed
If multiplex, efficiency and LOD of each assay.	E	Not applicable
DATA ANALYSIS
qPCR analysis program (source, version)	E	Microsoft Excel 2010	5/149
Cq method determination	E	See ref. Chen et al., 2023 and Yao et al., 2021	5/172
Outlier identification and disposition	E	Not performed
Results of NTCs	E	Not performed
Justification of number and choice of reference genes	E	See ref. Chen et al., 2023 and Yao et al., 2021	5/172
Description of normalisation method	E	See ref. Chen et al., 2023 and Yao et al., 2021	5/172
Number and concordance of biological replicates	D
Number and stage (RT or qPCR) of technical replicates	E	3	5/172
Repeatability (intra-assay variation)	E	Not performed
Reproducibility (inter-assay variation, %CV)	D	Not performed
Power analysis	D	Not performed
Statistical methods for result significance	E	ANOVA: see line 173	5/173
Software (source, version)	E	Microsoft Excel 2010; SPSS 19.0	5/149
Cq or raw data submission using RDML	D	Not done
Table 1. MIQE checklist for authors, reviewers and editors. All essential information (E) must be submitted with the manuscript. Desirable
information (D) should be submitted if available. If using primers obtained from RTPrimerDB, information on qPCR target, oligonucleotides,
protocols and validation is available from that source.
*: Assessing the absence of DNA using a no RT assay is essential when first extracting RNA. Once the sample has been validated as
RDNA-free, inclusion of a no-RT control is desirable, but no longer essential.
**: Disclosure of the probe sequence is highly desirable and strongly encouraged. However, since not all commercial pre-designed assay
vendors provide this information, it cannot be an essential requirement. Use of such assays is advised against.
